# Supplementary material for: Theoretical investigations of the Ir-catalyzed direct borylation of B(3,6)–H of o-carborane: the actual catalyst, mechanism, and origin of regioselectivity
Source: Royal Society of Chemistry journal article supplement (doi:10.1039/c8cy01322e), 2018-01-01
Supplement: c8cy01322e1.pdf [file c8cy01322e1.pdf]

## Electronic Supplementary Information for

### Theoretical Investigations to the Iridium-Catalyzed Direct Borylation of B(3,6)-H of *o*-Carborane: the Actual Catalyst, Mechanism, and Origin of Regioselectivity

Huining Bai,<sup>a</sup> Hao Xu,<sup>a</sup> Huimin Zhang,<sup>a</sup> Yuen Guo,<sup>a</sup> Jiankai Shan,<sup>a</sup> Donghui Wei,<sup>a</sup> Yanyan Zhu,<sup>a</sup> Shouren Zhang,<sup>b</sup> and Wenjing Zhang<sup>\*,a</sup>

<sup>a</sup>College of Chemistry and Molecular Engineering, Zhengzhou University, Zhengzhou, Henan Province 450001, P. R. China

<sup>b</sup>Henan Provincial Key Laboratory of Nanocomposites and Applications, Institute of Nanostructured Functional Materials, Huanghe Science and Technology College, Zhengzhou, Henan 450006, China

#### Content

|                                                                                                                                          |   |
|------------------------------------------------------------------------------------------------------------------------------------------|---|
| Part 1: The NAO analysis to the lowest-lying delocalized $\pi$ orbital of <i>o</i> -C <sub>2</sub> B <sub>10</sub> H <sub>12</sub> ..... | 2 |
| Part 2: Details of Mechanism III .....                                                                                                   | 4 |
| Part 3: Flexible scanning results from <b>Int4</b> .....                                                                                 | 5 |
| Part 4: Hydrogen bond distributions in <b>Int3s</b> and <b>Int5s</b> .....                                                               | 6 |
| Part 5: List of Cartesian coordinates of all structures involved in this work.....                                                       | 8 |

---

\*Corresponding author: [zhangwj@zzu.edu.cn](mailto:zhangwj@zzu.edu.cn) (W.-J. Zhang)

### Part 1: The NAO analysis<sup>[1]</sup> to the lowest-lying delocalized $\pi$ orbital of *o*-C<sub>2</sub>B<sub>10</sub>H<sub>12</sub>

All results were shown in Table S1 and Fig. S1. As we can see, the equatorial plane of the  $\pi$  orbital locates at the xz plane, in which the cage B(3,6,8,10) atoms locate as well. So these four atoms contribute their 2p<sub>y</sub> orbitals to the molecule orbital. While the cage C(1,2), B(4,5,7,11), and the H(17,24) atoms locate out of the plane, and they contribute their valence s (2s or 1s) and the p<sub>y</sub> orbitals to construct the molecule orbital. In another word, this  $\pi$  orbital is formed by the linear combination (hybridization) of the valence atomic orbitals of the cage carbon and borane atoms, which is in accordance with the LOL analysis which concludes the 26-electron-delocalization structure of carborane. The second and third lowest-lying  $\pi$  orbitals are with the xy (HOMO-22) and yz (HOMO-21) plane as the equatorial planes, respectively. They have similar components with HOMO-23.

**Table S1** Percentage of the major components that contribute to the lowest-lying  $\pi$  orbital (HOMO-23) of *o*-C<sub>2</sub>B<sub>10</sub>H<sub>12</sub> (M06-L/6-31G(d, p))

|                 | C(1,2) | B(3,6) | B(4,5,7,11) | B(8,10) | B(9,12) | H(17,24) |
|-----------------|--------|--------|-------------|---------|---------|----------|
| 1s              |        |        |             |         |         | 2.8%     |
| 2s              | 15.4%  |        | 4.1%        |         |         |          |
| 2p <sub>x</sub> |        |        | 2.0%        |         |         |          |
| 2p <sub>y</sub> | 5.1%   | 5.2%   |             | 1.2%    |         |          |
| 2p <sub>z</sub> | 1.1%   |        | 0.9%        |         | 0.8%    |          |

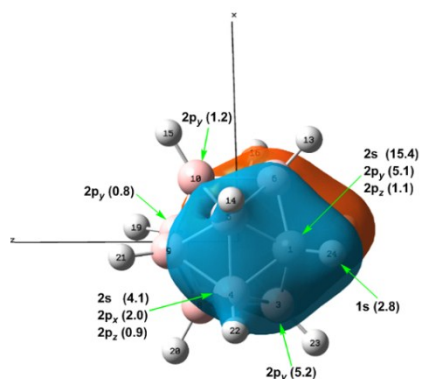

**Fig. S1** A brief map to illustrate the major components that contribute to the HOMO-23 orbital of  $o\text{-C}_2\text{B}_{10}\text{H}_{12}$ .

Obviously, these  $\pi$  orbitals are quite comparable with the lowest-lying  $\pi$  orbital of benzene, and the  $o$ -carborane also has  $\pi$  orbitals with one or more nodal planes (Fig. S2). The differences lie mainly in: (1) the benzene has only one this type of  $\pi$  orbital, but the  $o$ -carborane has three quasi degenerate ones (be exactly degenerate for  $\text{B}_{12}\text{H}_{12}^{2-}$ ). (2) the lowest-lying  $\pi$  orbital of benzene consists of six delocalized 2p orbitals with the same phase, but these of the carborane consist of 26 atomic orbitals (see the LOL analysis in main text), including not only 2p orbitals, but also s orbitals.

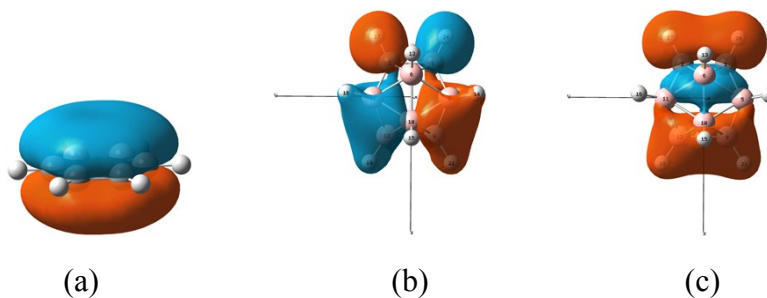

**Fig. S2** The lowest-lying  $\pi$  orbitals of benzene (a), the  $\pi$  orbitals of  $o$ -carborane with one nodal plane (b) or two nodal planes (c).

## Reference

- [1]. Reed, A. E.; Weinstock, R. B.; Weinhold, F., Natural population analysis. *J. Chem. Phys.* 1985, 83, 735-746.

## Part 2: Details of Mechanism III

This mechanism indicates that, with approach of the **R** to **D**, a precursory intermediate **E** generates with the H5 atom oriented to the Ir atom, followed by the nucleophilic attack of the H5 atom to the Ir<sup>III</sup> atom and simultaneous release of the product **P1**. Finally, the byproduct HBpin eliminates to regenerate the Ir<sup>I</sup> catalyst **C**.

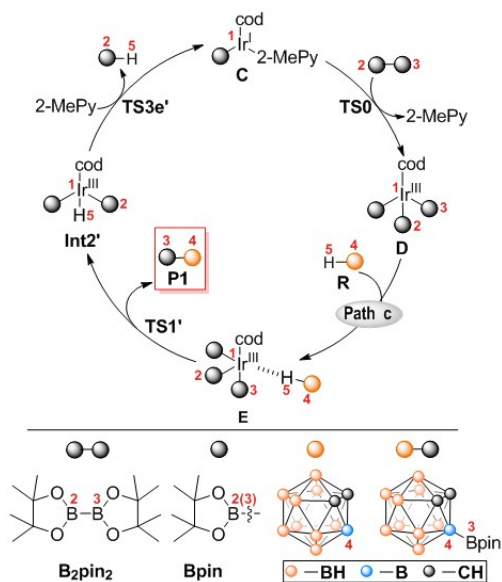

**Scheme S1** The proposed catalytic cycle of Mechanism III. The number labels aside the shaded balls indicate labels for the boron atom of the Bpin group (black balls) or the cage B(3) atom (orange balls).

### Part 3: Flexible scanning results from Int4

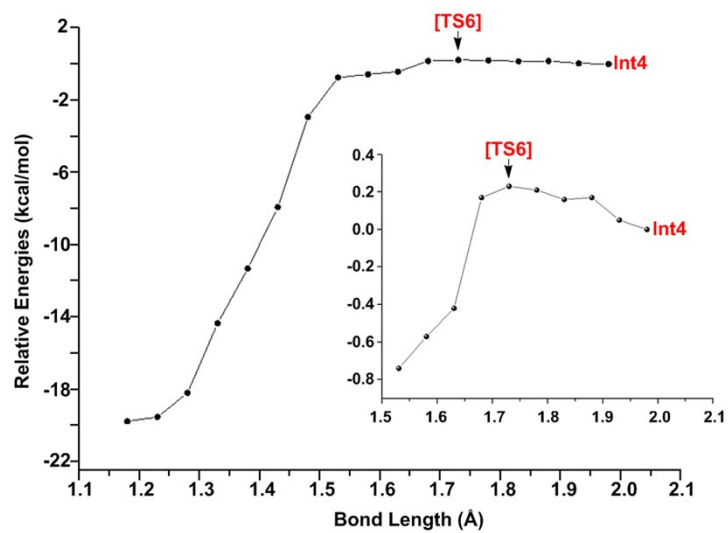

**Fig. S3** The flexible scanning curve to the bond length of H6-B7 from the optimized structure of **Int4**.

## Part 4: Hydrogen bond distributions in Int3s and Int5s

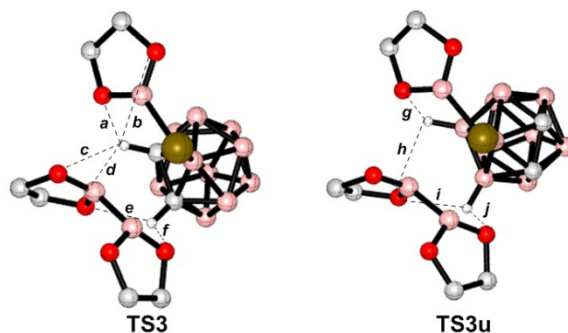

**Fig. S4** Hydrogen bonds distributions in **TS3** and **TS3u**<sup>a</sup>. The Bpin group bonded to the cage B(3) atom is omitted for brevity.

<sup>a</sup> The B–H···O is not an actual hydrogen bond, and we plot them after the way we do for the C–H···O just for the sake of visual comparison.

**Table S2** The bond lengths of hydrogen bonds in **TS3** and **TS3u**<sup>a</sup>.

| Stationary Point | Hydrogen Bond | Bond Length (Å) |      |      |      |      |
|------------------|---------------|-----------------|------|------|------|------|
|                  |               | O-H             | C-H  | B-H  | C-O  | B-O  |
| <b>TS3</b>       | <i>a</i>      | 2.34            | 1.08 | –    | 3.12 | –    |
|                  | <i>b</i>      | 3.95            | 1.08 | –    | 4.22 | –    |
|                  | <i>c</i>      | 3.73            | 1.08 | –    | 4.55 | –    |
|                  | <i>d</i>      | 2.48            | 1.08 | –    | 3.11 | –    |
|                  | <i>e</i>      | 2.22            | 1.08 | –    | 2.98 | –    |
|                  | <i>f</i>      | 2.36            | 1.08 | –    | 3.06 | –    |
| <b>TS3u</b>      | <i>g</i>      | 2.70            | –    | 1.18 | –    | 3.39 |
|                  | <i>h</i>      | 2.97            | –    | 1.18 | –    | 3.42 |
|                  | <i>i</i>      | 2.47            | –    | 1.17 | –    | 3.13 |
|                  | <i>j</i>      | 2.60            | –    | 1.17 | –    | 3.22 |

<sup>a</sup> The geometry parameters of the B–H···O “interactions” are also listed after the way we do for the C–H···O interactions, although they are not actual hydrogen bonds.

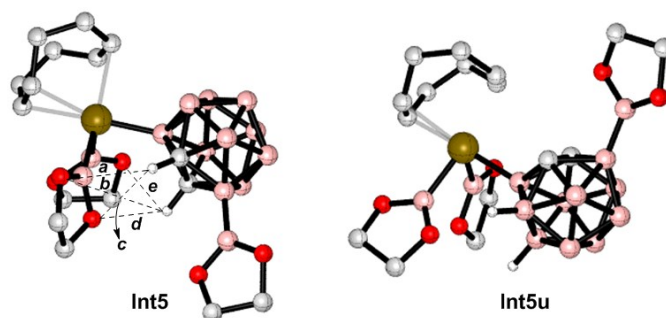

**Fig. S5** Hydrogen bonds distributions in **Int5** and **Int5u**<sup>a</sup>. The Bpin group bonded to the cage B(3) atom is omitted for brevity.

<sup>a</sup> The B–H···O is not an actual hydrogen bond, and we plot them after the way we do for the C–H···O just for the sake of visual comparison.

**Table S3** The bond lengths of hydrogen bonds in **Int5** and **Int5u**<sup>a</sup>.

|              | Hydrogen Bond | Bond Length (Å) |      |      |      |      |
|--------------|---------------|-----------------|------|------|------|------|
|              |               | O-H             | C-H  | B-H  | C-O  | B-O  |
| <b>Int5</b>  | <i>a</i>      | 2.81            | 1.09 | –    | 3.72 | –    |
|              | <i>b</i>      | 4.00            | 1.09 | –    | 4.34 | –    |
|              | <i>c</i>      | 2.96            | 1.09 | –    | 3.47 | –    |
|              | <i>d</i>      | 2.37            | 1.09 | –    | 3.17 | –    |
|              | <i>e</i>      | 3.43            | 1.09 | –    | 3.63 | –    |
| <b>Int5u</b> | <i>f</i>      | 2.53            | –    | 1.18 | –    | 3.07 |
|              | <i>g</i>      | 2.90            | –    | 1.18 | –    | 3.30 |
|              | <i>h</i>      | 2.98            | –    | 1.18 | –    | 3.55 |

<sup>a</sup> The geometry parameters of the B–H···O “interactions” are also listed after the way we do for the C–H···O interactions, although they are not actual hydrogen bonds.

## Part 5: List of Cartesian coordinates of all structures involved in this work

### 2-MePy

---

| Center<br>Number | Atomic<br>Number | Atomic<br>Type | Coordinates (Angstroms) |           |           |
|------------------|------------------|----------------|-------------------------|-----------|-----------|
|                  |                  |                | X                       | Y         | Z         |
| 1                | 6                | 0              | 0.522523                | -0.164385 | 0.000197  |
| 2                | 6                | 0              | 1.929401                | -0.164385 | 0.000197  |
| 3                | 6                | 0              | 2.596092                | 1.062222  | 0.000197  |
| 4                | 6                | 0              | 1.842019                | 2.237009  | -0.000044 |
| 5                | 6                | 0              | 0.438817                | 2.134204  | -0.000185 |
| 6                | 7                | 0              | -0.220713               | 0.959253  | 0.000000  |
| 7                | 1                | 0              | 3.694636                | 1.101998  | -0.000753 |
| 8                | 1                | 0              | -0.043024               | -1.113206 | 0.000319  |
| 9                | 1                | 0              | 2.484133                | -1.111286 | 0.000461  |
| 10               | 1                | 0              | 2.326055                | 3.221933  | -0.000145 |
| 11               | 6                | 0              | -0.444133               | 3.395949  | -0.000298 |
| 12               | 1                | 0              | -0.236699               | 3.976509  | 0.874243  |
| 13               | 1                | 0              | -0.234023               | 3.978225  | -0.873057 |
| 14               | 1                | 0              | -1.475153               | 3.109780  | -0.002157 |

---

### B<sub>2</sub>pin<sub>2</sub>

---

| Center<br>Number | Atomic<br>Number | Atomic<br>Type | Coordinates (Angstroms) |           |           |
|------------------|------------------|----------------|-------------------------|-----------|-----------|
|                  |                  |                | X                       | Y         | Z         |
| 1                | 5                | 0              | -0.305603               | -1.247878 | 0.000000  |
| 2                | 5                | 0              | 1.454397                | -1.247878 | 0.000000  |
| 3                | 8                | 0              | -1.075603               | 0.085801  | 0.000000  |
| 4                | 8                | 0              | -1.075603               | -2.581557 | 0.000000  |
| 5                | 8                | 0              | 2.224397                | -1.245292 | 1.333677  |
| 6                | 6                | 0              | -2.505603               | -2.581557 | 0.000000  |
| 7                | 6                | 0              | -2.481655               | -0.174794 | -0.002614 |
| 8                | 8                | 0              | 2.224397                | -1.250464 | -1.333677 |
| 9                | 6                | 0              | 3.630038                | -1.209918 | 1.073250  |
| 10               | 6                | 0              | 3.630321                | -1.249957 | -1.072374 |
| 11               | 6                | 0              | 4.302090                | 0.009196  | -1.651044 |
| 12               | 1                | 0              | 5.353254                | -0.024873 | -1.454084 |
| 13               | 1                | 0              | 4.138261                | 0.047190  | -2.707745 |

---



|    |   |   |           |           |           |
|----|---|---|-----------|-----------|-----------|
| 14 | 1 | 0 | 3.881504  | 0.880137  | -1.193367 |
| 15 | 6 | 0 | 4.294186  | -2.533972 | -1.603588 |
| 16 | 1 | 0 | 4.156043  | -2.594925 | -2.662880 |
| 17 | 1 | 0 | 5.340563  | -2.512835 | -1.380991 |
| 18 | 1 | 0 | 3.847210  | -3.386297 | -1.135982 |
| 19 | 6 | 0 | 4.260734  | 0.090684  | 1.604529  |
| 20 | 1 | 0 | 4.175494  | 0.118795  | 2.670758  |
| 21 | 1 | 0 | 5.293899  | 0.124830  | 1.328297  |
| 22 | 1 | 0 | 3.751020  | 0.932092  | 1.183668  |
| 23 | 6 | 0 | 4.333503  | -2.451613 | 1.651980  |
| 24 | 1 | 0 | 5.363474  | -2.445552 | 1.362111  |
| 25 | 1 | 0 | 4.263339  | -2.436135 | 2.719565  |
| 26 | 1 | 0 | 3.862469  | -3.335889 | 1.276369  |
| 27 | 6 | 0 | -3.144926 | 0.383247  | -1.275509 |
| 28 | 1 | 0 | -4.202892 | 0.232487  | -1.221834 |
| 29 | 1 | 0 | -2.937438 | 1.429822  | -1.356313 |
| 30 | 1 | 0 | -2.755294 | -0.124839 | -2.132792 |
| 31 | 6 | 0 | -3.150173 | 0.386060  | 1.266294  |
| 32 | 1 | 0 | -2.988682 | 1.442574  | 1.317263  |
| 33 | 1 | 0 | -4.200990 | 0.187041  | 1.233507  |
| 34 | 1 | 0 | -2.725336 | -0.081753 | 2.129755  |
| 35 | 6 | 0 | -3.103138 | -3.171775 | 1.290812  |
| 36 | 1 | 0 | -4.154977 | -2.977407 | 1.318294  |
| 37 | 1 | 0 | -2.935015 | -4.228290 | 1.311071  |
| 38 | 1 | 0 | -2.634592 | -2.719714 | 2.139932  |
| 39 | 6 | 0 | -3.103138 | -3.174577 | -1.289527 |
| 40 | 1 | 0 | -2.936213 | -4.231334 | -1.306844 |
| 41 | 1 | 0 | -4.154740 | -2.979083 | -1.318087 |
| 42 | 1 | 0 | -2.633632 | -2.725347 | -2.139618 |

---

**BH**

---

| Center<br>Number | Atomic<br>Number | Atomic<br>Type | Coordinates (Angstroms) |           |          |
|------------------|------------------|----------------|-------------------------|-----------|----------|
|                  |                  |                | X                       | Y         | Z        |
| 1                | 5                | 0              | 0.000000                | 0.000000  | 0.000000 |
| 2                | 5                | 0              | 0.000000                | 0.000000  | 2.902961 |
| 3                | 5                | 0              | 2.514167                | 0.000000  | 1.451931 |
| 4                | 5                | 0              | -0.238527               | -1.003000 | 1.469813 |
| 5                | 5                | 0              | 1.391965                | -1.003000 | 2.374109 |

|    |   |   |           |           |           |
|----|---|---|-----------|-----------|-----------|
| 6  | 5 | 0 | -0.824544 | 0.641000  | 1.476474  |
| 7  | 5 | 0 | 1.689921  | 0.641000  | 2.878929  |
| 8  | 5 | 0 | 0.327662  | 1.672000  | 0.606381  |
| 9  | 5 | 0 | 0.361033  | 1.672000  | 2.316246  |
| 10 | 5 | 0 | 1.825472  | 1.672000  | 1.432266  |
| 11 | 1 | 0 | 3.672828  | -0.223391 | 1.452895  |
| 12 | 1 | 0 | 1.771633  | -1.925031 | 3.005069  |
| 13 | 1 | 0 | 2.280092  | 0.870055  | 3.874737  |
| 14 | 1 | 0 | 2.524234  | 2.622646  | 1.412170  |
| 15 | 1 | 0 | 2.214595  | 0.869897  | -1.010102 |
| 16 | 1 | 0 | -0.039026 | 2.622848  | 0.011546  |
| 17 | 1 | 0 | 0.029167  | 2.622835  | 2.931207  |
| 18 | 1 | 0 | -1.982018 | 0.870046  | 1.490355  |
| 19 | 1 | 0 | -0.579764 | -0.223539 | 3.906108  |
| 20 | 1 | 0 | -0.975043 | -1.924833 | 1.482799  |
| 21 | 1 | 0 | -0.578626 | -0.223373 | -1.003841 |
| 22 | 1 | 0 | 1.716453  | -1.925136 | -0.133354 |
| 23 | 6 | 0 | 1.647821  | 0.641000  | -0.000759 |
| 24 | 6 | 0 | 1.359760  | -1.003000 | 0.510723  |

---

**C**

---

| Center<br>Number | Atomic<br>Number | Atomic<br>Type | Coordinates (Angstroms) |           |           |
|------------------|------------------|----------------|-------------------------|-----------|-----------|
|                  |                  |                | X                       | Y         | Z         |
| 1                | 5                | 0              | 1.249817                | -0.465803 | -0.186623 |
| 2                | 8                | 0              | 2.069242                | 0.062671  | 0.809685  |
| 3                | 8                | 0              | 2.010677                | -1.172958 | -1.104703 |
| 4                | 6                | 0              | 3.393099                | -0.934883 | -0.785035 |
| 5                | 6                | 0              | 3.374786                | -0.508735 | 0.672292  |
| 6                | 6                | 0              | 4.173582                | -2.220261 | -1.008257 |
| 7                | 1                | 0              | 4.121872                | -2.499553 | -2.064246 |
| 8                | 1                | 0              | 5.231901                | -2.089756 | -0.745118 |
| 9                | 1                | 0              | 3.767079                | -3.049603 | -0.417622 |
| 10               | 6                | 0              | 3.891486                | 0.126974  | -1.762437 |
| 11               | 1                | 0              | 4.948381                | 0.369537  | -1.597296 |
| 12               | 1                | 0              | 3.781955                | -0.242689 | -2.787236 |
| 13               | 1                | 0              | 3.301701                | 1.050393  | -1.674060 |
| 14               | 6                | 0              | 3.465463                | -1.628293 | 1.711730  |
| 15               | 1                | 0              | 4.441326                | -2.127806 | 1.694181  |

|    |    |   |           |           |           |
|----|----|---|-----------|-----------|-----------|
| 16 | 1  | 0 | 3.314607  | -1.208787 | 2.712834  |
| 17 | 1  | 0 | 2.682930  | -2.381331 | 1.540722  |
| 18 | 6  | 0 | 4.403596  | 0.567208  | 0.984728  |
| 19 | 1  | 0 | 4.287823  | 0.890462  | 2.023527  |
| 20 | 1  | 0 | 5.424169  | 0.181796  | 0.862635  |
| 21 | 1  | 0 | 4.283870  | 1.449104  | 0.341543  |
| 22 | 7  | 0 | -0.503105 | 1.915957  | -0.122676 |
| 23 | 6  | 0 | -0.180616 | 2.723276  | 0.920339  |
| 24 | 6  | 0 | -0.670637 | 2.468298  | -1.343951 |
| 25 | 6  | 0 | -0.052987 | 4.102847  | 0.737476  |
| 26 | 6  | 0 | -0.559266 | 3.828005  | -1.580119 |
| 27 | 1  | 0 | -0.899740 | 1.763797  | -2.139476 |
| 28 | 6  | 0 | -0.249477 | 4.666126  | -0.514607 |
| 29 | 1  | 0 | 0.208520  | 4.722005  | 1.591123  |
| 30 | 1  | 0 | -0.709412 | 4.214296  | -2.583813 |
| 31 | 1  | 0 | -0.150741 | 5.737751  | -0.660224 |
| 32 | 6  | 0 | 0.052108  | 2.073185  | 2.244920  |
| 33 | 1  | 0 | -0.894357 | 1.762173  | 2.695847  |
| 34 | 1  | 0 | 0.670000  | 1.176716  | 2.107578  |
| 35 | 1  | 0 | 0.547214  | 2.746525  | 2.952287  |
| 36 | 77 | 0 | -0.792148 | -0.242126 | -0.032346 |
| 37 | 6  | 0 | -1.369036 | -1.749041 | -1.320647 |
| 38 | 6  | 0 | -3.123322 | 0.051621  | 0.150319  |
| 39 | 6  | 0 | -2.591602 | -0.363220 | 1.349285  |
| 40 | 6  | 0 | -1.093874 | -2.340989 | -0.041737 |
| 41 | 6  | 0 | -2.759759 | -1.498328 | -1.863704 |
| 42 | 1  | 0 | -0.611329 | -1.879334 | -2.097231 |
| 43 | 6  | 0 | -3.760114 | -0.878988 | -0.852050 |
| 44 | 1  | 0 | -3.269698 | 1.121722  | 0.011460  |
| 45 | 6  | 0 | -2.647136 | -1.772406 | 1.881675  |
| 46 | 1  | 0 | -2.446228 | 0.402655  | 2.112452  |
| 47 | 6  | 0 | -2.198775 | -2.841092 | 0.875439  |
| 48 | 1  | 0 | -0.163417 | -2.903084 | 0.030682  |
| 49 | 1  | 0 | -2.657452 | -0.821960 | -2.723340 |
| 50 | 1  | 0 | -3.181283 | -2.431787 | -2.272198 |
| 51 | 1  | 0 | -4.530640 | -0.335268 | -1.408540 |
| 52 | 1  | 0 | -4.296528 | -1.676444 | -0.320873 |
| 53 | 1  | 0 | -1.996827 | -1.821135 | 2.762894  |
| 54 | 1  | 0 | -3.662860 | -1.989706 | 2.247861  |
| 55 | 1  | 0 | -3.051719 | -3.196796 | 0.283732  |
| 56 | 1  | 0 | -1.847523 | -3.718435 | 1.428555  |

---

**D**

---

| Center<br>Number | Atomic<br>Number | Atomic<br>Type | Coordinates (Angstroms) |           |           |
|------------------|------------------|----------------|-------------------------|-----------|-----------|
|                  |                  |                | X                       | Y         | Z         |
| 1                | 5                | 0              | 0.125913                | 1.043002  | 0.294871  |
| 2                | 8                | 0              | 0.262429                | 1.529608  | 1.588869  |
| 3                | 8                | 0              | 0.042841                | 2.076579  | -0.615528 |
| 4                | 6                | 0              | -0.108321               | 2.931932  | 1.556557  |
| 5                | 6                | 0              | 0.228442                | 3.328920  | 0.086816  |
| 6                | 6                | 0              | 1.674971                | 3.768044  | -0.082333 |
| 7                | 1                | 0              | 1.921081                | 3.827806  | -1.146355 |
| 8                | 1                | 0              | 1.840481                | 4.754158  | 0.364199  |
| 9                | 1                | 0              | 2.357013                | 3.047922  | 0.372462  |
| 10               | 6                | 0              | -0.712007               | 4.345903  | -0.532254 |
| 11               | 1                | 0              | -0.714979               | 5.281938  | 0.037308  |
| 12               | 1                | 0              | -0.389165               | 4.576985  | -1.552455 |
| 13               | 1                | 0              | -1.732606               | 3.958797  | -0.584182 |
| 14               | 6                | 0              | 0.681492                | 3.661057  | 2.623248  |
| 15               | 1                | 0              | 0.482341                | 4.737757  | 2.590009  |
| 16               | 1                | 0              | 0.391329                | 3.297780  | 3.613480  |
| 17               | 1                | 0              | 1.756154                | 3.504580  | 2.507741  |
| 18               | 6                | 0              | -1.601609               | 2.997289  | 1.845228  |
| 19               | 1                | 0              | -1.808390               | 2.548018  | 2.821560  |
| 20               | 1                | 0              | -1.969312               | 4.028205  | 1.863883  |
| 21               | 1                | 0              | -2.153092               | 2.439113  | 1.082448  |
| 22               | 5                | 0              | 1.912452                | -0.366617 | -0.920361 |
| 23               | 8                | 0              | 2.828848                | -1.348733 | -1.285422 |
| 24               | 8                | 0              | 2.563888                | 0.837449  | -0.695318 |
| 25               | 6                | 0              | 3.992792                | 0.598527  | -0.698162 |
| 26               | 6                | 0              | 4.121589                | -0.738667 | -1.495966 |
| 27               | 6                | 0              | 4.425201                | 0.466580  | 0.756399  |
| 28               | 1                | 0              | 5.513518                | 0.399570  | 0.852047  |
| 29               | 1                | 0              | 4.083855                | 1.343929  | 1.315099  |
| 30               | 1                | 0              | 3.989610                | -0.420677 | 1.224795  |
| 31               | 6                | 0              | 4.683881                | 1.789839  | -1.333543 |
| 32               | 1                | 0              | 4.551231                | 2.678959  | -0.710736 |
| 33               | 1                | 0              | 5.759682                | 1.607509  | -1.431261 |
| 34               | 1                | 0              | 4.279963                | 2.011485  | -2.323596 |

---

|    |    |   |           |           |           |
|----|----|---|-----------|-----------|-----------|
| 35 | 6  | 0 | 4.311378  | -0.528479 | -2.990250 |
| 36 | 1  | 0 | 5.301162  | -0.119692 | -3.216029 |
| 37 | 1  | 0 | 4.221706  | -1.489896 | -3.506499 |
| 38 | 1  | 0 | 3.550409  | 0.143005  | -3.388735 |
| 39 | 6  | 0 | 5.177616  | -1.698867 | -0.978786 |
| 40 | 1  | 0 | 5.158742  | -2.616912 | -1.573464 |
| 41 | 1  | 0 | 6.179631  | -1.263981 | -1.061053 |
| 42 | 1  | 0 | 5.005518  | -1.975351 | 0.063433  |
| 43 | 77 | 0 | 0.020048  | -0.979670 | -0.157448 |
| 44 | 6  | 0 | -1.650776 | -1.222417 | 1.619231  |
| 45 | 6  | 0 | 1.228852  | -1.193686 | 1.837157  |
| 46 | 6  | 0 | 1.389864  | -2.389478 | 1.142295  |
| 47 | 6  | 0 | -1.489366 | -2.488126 | 1.106855  |
| 48 | 6  | 0 | -1.077017 | -0.750812 | 2.920662  |
| 49 | 1  | 0 | -2.433100 | -0.598650 | 1.200867  |
| 50 | 6  | 0 | 0.415935  | -1.057746 | 3.106583  |
| 51 | 1  | 0 | 1.980874  | -0.422386 | 1.692426  |
| 52 | 6  | 0 | 0.718807  | -3.692032 | 1.471556  |
| 53 | 1  | 0 | 2.265062  | -2.475336 | 0.503616  |
| 54 | 6  | 0 | -0.758755 | -3.572981 | 1.851225  |
| 55 | 1  | 0 | -2.110246 | -2.771911 | 0.262632  |
| 56 | 1  | 0 | -1.228323 | 0.327232  | 2.990827  |
| 57 | 1  | 0 | -1.652734 | -1.202065 | 3.743510  |
| 58 | 1  | 0 | 0.857929  | -0.260036 | 3.710462  |
| 59 | 1  | 0 | 0.541191  | -1.983198 | 3.683085  |
| 60 | 1  | 0 | 0.808905  | -4.349363 | 0.601884  |
| 61 | 1  | 0 | 1.276924  | -4.195722 | 2.276557  |
| 62 | 1  | 0 | -0.865754 | -3.398072 | 2.928752  |
| 63 | 1  | 0 | -1.252790 | -4.529482 | 1.650627  |
| 64 | 5  | 0 | -1.848517 | -0.281658 | -0.992483 |
| 65 | 8  | 0 | -2.759901 | -1.293314 | -1.244318 |
| 66 | 8  | 0 | -2.492988 | 0.943160  | -0.860875 |
| 67 | 6  | 0 | -3.928490 | 0.738436  | -0.939804 |
| 68 | 6  | 0 | -4.062168 | -0.722923 | -1.502735 |
| 69 | 6  | 0 | -5.085732 | -1.586273 | -0.786277 |
| 70 | 1  | 0 | -6.098023 | -1.186313 | -0.909694 |
| 71 | 1  | 0 | -5.068195 | -2.594942 | -1.208038 |
| 72 | 1  | 0 | -4.873175 | -1.667582 | 0.282569  |
| 73 | 6  | 0 | -4.308293 | -0.776727 | -3.003361 |
| 74 | 1  | 0 | -4.266976 | -1.816086 | -3.337653 |
| 75 | 1  | 0 | -5.292635 | -0.372152 | -3.260534 |

|    |   |   |           |           |           |
|----|---|---|-----------|-----------|-----------|
| 76 | 1 | 0 | -3.537890 | -0.226556 | -3.545991 |
| 77 | 6 | 0 | -4.530507 | 1.816799  | -1.824942 |
| 78 | 1 | 0 | -5.622343 | 1.730451  | -1.843737 |
| 79 | 1 | 0 | -4.277907 | 2.803030  | -1.424072 |
| 80 | 1 | 0 | -4.172596 | 1.768581  | -2.852322 |
| 81 | 6 | 0 | -4.507924 | 0.921612  | 0.460511  |
| 82 | 1 | 0 | -4.291587 | 1.933347  | 0.814510  |
| 83 | 1 | 0 | -5.594796 | 0.795898  | 0.453513  |
| 84 | 1 | 0 | -4.100707 | 0.218890  | 1.190742  |

---

### HBpin

| Center<br>Number | Atomic<br>Number | Atomic<br>Type | Coordinates (Angstroms) |           |           |
|------------------|------------------|----------------|-------------------------|-----------|-----------|
|                  |                  |                | X                       | Y         | Z         |
| 1                | 5                | 0              | 0.000000                | 2.021146  | 0.000001  |
| 2                | 8                | 0              | -1.333679               | 1.251146  | 0.000003  |
| 3                | 8                | 0              | 1.333679                | 1.251146  | -0.000001 |
| 4                | 6                | 0              | 1.073082                | -0.154909 | 0.000000  |
| 5                | 6                | 0              | -1.073082               | -0.154909 | 0.000000  |
| 6                | 6                | 0              | -1.628332               | -0.822522 | -1.271845 |
| 7                | 1                | 0              | -1.575398               | -1.886201 | -1.168477 |
| 8                | 1                | 0              | -2.647275               | -0.528196 | -1.413367 |
| 9                | 1                | 0              | -1.048115               | -0.517029 | -2.117375 |
| 10               | 6                | 0              | -1.628332               | -0.822526 | 1.271843  |
| 11               | 1                | 0              | -2.668234               | -0.590969 | 1.371268  |
| 12               | 1                | 0              | -1.504218               | -1.882956 | 1.201252  |
| 13               | 1                | 0              | -1.098333               | -0.457516 | 2.126694  |
| 14               | 6                | 0              | 1.628332                | -0.822523 | 1.271844  |
| 15               | 1                | 0              | 1.404211                | -1.868608 | 1.252446  |
| 16               | 1                | 0              | 2.688759                | -0.685652 | 1.312605  |
| 17               | 1                | 0              | 1.177817                | -0.377172 | 2.134166  |
| 18               | 6                | 0              | 1.628332                | -0.822524 | -1.271844 |
| 19               | 1                | 0              | 2.690676                | -0.699061 | -1.304730 |
| 20               | 1                | 0              | 1.390705                | -1.865736 | -1.259849 |
| 21               | 1                | 0              | 1.189404                | -0.366639 | -2.134637 |
| 22               | 1                | 0              | 0.000000                | 3.201146  | 0.000000  |

---

**Int1**

---

| Center<br>Number | Atomic<br>Number | Atomic<br>Type | Coordinates (Angstroms) |           |           |
|------------------|------------------|----------------|-------------------------|-----------|-----------|
|                  |                  |                | X                       | Y         | Z         |
| 1                | 5                | 0              | -0.183577               | 1.514918  | -0.484276 |
| 2                | 5                | 0              | -2.162909               | -0.149840 | 0.409941  |
| 3                | 5                | 0              | 2.137231                | 0.034523  | 0.564561  |
| 4                | 8                | 0              | 3.216297                | -0.397939 | 1.305128  |
| 5                | 8                | 0              | -2.744898               | 0.930817  | -0.254929 |
| 6                | 8                | 0              | -3.153510               | -1.040340 | 0.802355  |
| 7                | 8                | 0              | -0.429726               | 1.525228  | -1.850197 |
| 8                | 8                | 0              | 0.062463                | 2.776482  | 0.012550  |
| 9                | 8                | 0              | 2.565483                | 0.748634  | -0.564278 |
| 10               | 6                | 0              | -4.446218               | -0.456047 | 0.510002  |
| 11               | 6                | 0              | -4.098597               | 0.567725  | -0.617301 |
| 12               | 6                | 0              | 4.411858                | 0.251103  | 0.811586  |
| 13               | 6                | 0              | 4.025176                | 0.676806  | -0.638373 |
| 14               | 6                | 0              | -0.296346               | 3.719910  | -1.045326 |
| 15               | 6                | 0              | -0.176217               | 2.860678  | -2.345922 |
| 16               | 6                | 0              | -1.714495               | 4.170128  | -0.750342 |
| 17               | 1                | 0              | -1.749853               | 4.627649  | 0.242455  |
| 18               | 1                | 0              | -2.064631               | 4.909893  | -1.481990 |
| 19               | 1                | 0              | -2.395128               | 3.307283  | -0.759651 |
| 20               | 6                | 0              | -1.201221               | 3.162049  | -3.412517 |
| 21               | 1                | 0              | -1.095258               | 4.184700  | -3.777550 |
| 22               | 1                | 0              | -1.073224               | 2.487653  | -4.254282 |
| 23               | 1                | 0              | -2.219194               | 3.035411  | -3.026982 |
| 24               | 6                | 0              | 1.237299                | 2.841003  | -2.927883 |
| 25               | 1                | 0              | 1.281344                | 2.074587  | -3.706521 |
| 26               | 1                | 0              | 1.505547                | 3.803889  | -3.375955 |
| 27               | 1                | 0              | 1.970932                | 2.581217  | -2.158616 |
| 28               | 6                | 0              | 0.669242                | 4.883449  | -0.976085 |
| 29               | 1                | 0              | 0.492605                | 5.585988  | -1.799979 |
| 30               | 1                | 0              | 0.539006                | 5.431303  | -0.036959 |
| 31               | 1                | 0              | 1.713468                | 4.557726  | -1.027488 |
| 32               | 6                | 0              | 4.551979                | 2.031852  | -1.069213 |
| 33               | 1                | 0              | 5.644902                | 2.047601  | -1.021948 |
| 34               | 1                | 0              | 4.263141                | 2.237480  | -2.097023 |
| 35               | 1                | 0              | 4.166905                | 2.834653  | -0.432840 |

|    |   |   |           |           |           |
|----|---|---|-----------|-----------|-----------|
| 36 | 6 | 0 | 4.367587  | -0.363014 | -1.697036 |
| 37 | 1 | 0 | 3.908413  | -0.073829 | -2.657522 |
| 38 | 1 | 0 | 5.450280  | -0.437514 | -1.854739 |
| 39 | 1 | 0 | 3.988698  | -1.353939 | -1.434681 |
| 40 | 6 | 0 | 4.660719  | 1.440450  | 1.720529  |
| 41 | 1 | 0 | 4.761445  | 1.097339  | 2.751485  |
| 42 | 1 | 0 | 5.582456  | 1.980838  | 1.452934  |
| 43 | 1 | 0 | 3.831087  | 2.153828  | 1.688368  |
| 44 | 6 | 0 | 5.558987  | -0.734333 | 0.900331  |
| 45 | 1 | 0 | 6.477666  | -0.312421 | 0.481367  |
| 46 | 1 | 0 | 5.750388  | -0.989697 | 1.938908  |
| 47 | 1 | 0 | 5.328714  | -1.658313 | 0.362232  |
| 48 | 6 | 0 | -4.014130 | -0.078670 | -1.992314 |
| 49 | 1 | 0 | -5.006982 | -0.308235 | -2.405098 |
| 50 | 1 | 0 | -3.506097 | 0.597128  | -2.679629 |
| 51 | 1 | 0 | -3.448527 | -1.019107 | -1.953738 |
| 52 | 6 | 0 | -4.956816 | 1.807394  | -0.654120 |
| 53 | 1 | 0 | -4.646252 | 2.456041  | -1.475201 |
| 54 | 1 | 0 | -6.014457 | 1.551881  | -0.811002 |
| 55 | 1 | 0 | -4.887735 | 2.383601  | 0.271773  |
| 56 | 6 | 0 | -4.936319 | 0.226566  | 1.780987  |
| 57 | 1 | 0 | -5.942590 | 0.644607  | 1.655034  |
| 58 | 1 | 0 | -4.961381 | -0.498064 | 2.599138  |
| 59 | 1 | 0 | -4.261358 | 1.044531  | 2.067188  |
| 60 | 6 | 0 | -5.398387 | -1.560438 | 0.093317  |
| 61 | 1 | 0 | -5.583932 | -2.230331 | 0.934586  |
| 62 | 1 | 0 | -6.358826 | -1.146827 | -0.224418 |
| 63 | 1 | 0 | -4.978985 | -2.155696 | -0.724672 |
| 64 | 5 | 0 | 0.134369  | -1.836115 | -0.605376 |
| 65 | 5 | 0 | 1.628443  | -2.801064 | -0.908526 |
| 66 | 5 | 0 | 0.482809  | -2.370235 | -3.472015 |
| 67 | 5 | 0 | -0.981475 | -3.182350 | -2.940124 |
| 68 | 1 | 0 | -0.947183 | -0.790867 | -2.427547 |
| 69 | 5 | 0 | 1.843740  | -3.110019 | -2.626265 |
| 70 | 1 | 0 | 1.601870  | -0.749181 | -2.174371 |
| 71 | 5 | 0 | 1.224529  | -4.367886 | -1.583186 |
| 72 | 1 | 0 | 2.570165  | -2.522530 | -0.242166 |
| 73 | 5 | 0 | -0.525167 | -4.421800 | -1.778022 |
| 74 | 1 | 0 | 0.092124  | -4.049815 | 0.733303  |
| 75 | 1 | 0 | -2.266921 | -2.700601 | -0.793305 |
| 76 | 5 | 0 | 0.507256  | -4.106247 | -3.182518 |



|     |    |   |           |           |           |
|-----|----|---|-----------|-----------|-----------|
| 77  | 1  | 0 | 0.575419  | -1.729546 | -4.450059 |
| 78  | 1  | 0 | -1.919627 | -3.140239 | -3.648537 |
| 79  | 1  | 0 | 2.918483  | -2.991360 | -3.116752 |
| 80  | 1  | 0 | 1.884817  | -5.331848 | -1.331005 |
| 81  | 1  | 0 | -1.158380 | -5.421637 | -1.669517 |
| 82  | 1  | 0 | 0.625465  | -4.854451 | -4.090901 |
| 83  | 77 | 0 | -0.014666 | -0.215032 | 0.821627  |
| 84  | 6  | 0 | -0.703691 | -1.735753 | 2.351380  |
| 85  | 6  | 0 | -0.831111 | 1.084680  | 2.527325  |
| 86  | 6  | 0 | 0.570516  | 1.236929  | 2.502142  |
| 87  | 6  | 0 | 0.696084  | -1.594222 | 2.463016  |
| 88  | 6  | 0 | -1.664023 | -1.192558 | 3.382020  |
| 89  | 1  | 0 | -1.087723 | -2.559619 | 1.768065  |
| 90  | 6  | 0 | -1.505081 | 0.316148  | 3.641388  |
| 91  | 1  | 0 | -1.411303 | 1.867687  | 2.049662  |
| 92  | 6  | 0 | 1.471397  | 0.608542  | 3.540607  |
| 93  | 1  | 0 | 0.954655  | 2.124094  | 2.013531  |
| 94  | 6  | 0 | 1.319047  | -0.910700 | 3.663108  |
| 95  | 1  | 0 | 1.310169  | -2.337014 | 1.957024  |
| 96  | 1  | 0 | -2.668951 | -1.408708 | 3.043490  |
| 97  | 1  | 0 | -1.525245 | -1.757193 | 4.327208  |
| 98  | 1  | 0 | -2.496654 | 0.746188  | 3.827986  |
| 99  | 1  | 0 | -0.937277 | 0.484081  | 4.573341  |
| 100 | 1  | 0 | 2.504070  | 0.839969  | 3.286854  |
| 101 | 1  | 0 | 1.274865  | 1.095491  | 4.505982  |
| 102 | 1  | 0 | 0.716727  | -1.155369 | 4.551857  |
| 103 | 1  | 0 | 2.303791  | -1.351769 | 3.840603  |
| 104 | 1  | 0 | 0.708453  | 0.147232  | -0.771154 |
| 105 | 6  | 0 | 1.113673  | -1.714713 | -2.048524 |
| 106 | 6  | 0 | -0.479728 | -1.745880 | -2.209369 |
| 107 | 5  | 0 | -1.182798 | -2.887648 | -1.210002 |
| 108 | 5  | 0 | 0.183332  | -3.609437 | -0.368463 |

---

**Intlu**

---

| Center<br>Number | Atomic<br>Number | Atomic<br>Type | Coordinates (Angstroms) |           |           |
|------------------|------------------|----------------|-------------------------|-----------|-----------|
|                  |                  |                | X                       | Y         | Z         |
| 1                | 5                | 0              | -0.131311               | 1.603752  | -0.460020 |
| 2                | 5                | 0              | -2.145333               | -0.027024 | 0.429847  |
| 3                | 5                | 0              | 2.167520                | 0.047144  | 0.426598  |
| 4                | 8                | 0              | 3.218915                | -0.531815 | 1.105473  |
| 5                | 8                | 0              | -2.838061               | 1.184342  | 0.394738  |
| 6                | 8                | 0              | -3.021313               | -1.081777 | 0.234004  |
| 7                | 8                | 0              | -0.544654               | 1.665628  | -1.775348 |
| 8                | 8                | 0              | 0.256849                | 2.822434  | 0.019037  |
| 9                | 8                | 0              | 2.613117                | 0.837331  | -0.619543 |
| 10               | 6                | 0              | -4.383702               | -0.570952 | 0.123345  |
| 11               | 6                | 0              | -4.138615               | 0.935840  | -0.215278 |
| 12               | 6                | 0              | 4.446122                | 0.073015  | 0.640493  |
| 13               | 6                | 0              | 4.046509                | 0.648635  | -0.759998 |
| 14               | 6                | 0              | -0.113113               | 3.811630  | -0.979698 |
| 15               | 6                | 0              | -0.169699               | 2.968299  | -2.288072 |
| 16               | 6                | 0              | -1.478470               | 4.351431  | -0.575483 |
| 17               | 1                | 0              | -1.406043               | 4.774795  | 0.435891  |
| 18               | 1                | 0              | -1.829999               | 5.136374  | -1.248837 |
| 19               | 1                | 0              | -2.210254               | 3.548432  | -0.544306 |
| 20               | 6                | 0              | -1.207147               | 3.413480  | -3.300505 |
| 21               | 1                | 0              | -0.971034               | 4.401966  | -3.686251 |
| 22               | 1                | 0              | -1.215547               | 2.714118  | -4.140889 |
| 23               | 1                | 0              | -2.207255               | 3.437817  | -2.874026 |
| 24               | 6                | 0              | 1.193502                | 2.801567  | -2.953786 |
| 25               | 1                | 0              | 1.116032                | 2.054115  | -3.749257 |
| 26               | 1                | 0              | 1.533147                | 3.746246  | -3.402738 |
| 27               | 1                | 0              | 1.935177                | 2.456595  | -2.241889 |
| 28               | 6                | 0              | 0.938790                | 4.910518  | -0.987355 |
| 29               | 1                | 0              | 0.742562                | 5.622452  | -1.784086 |
| 30               | 1                | 0              | 0.916879                | 5.449438  | -0.032053 |
| 31               | 1                | 0              | 1.936813                | 4.492907  | -1.115970 |
| 32               | 6                | 0              | 4.669600                | 2.002940  | -1.080344 |
| 33               | 1                | 0              | 5.762591                | 1.933767  | -1.087563 |
| 34               | 1                | 0              | 4.361065                | 2.324440  | -2.079097 |
| 35               | 1                | 0              | 4.372453                | 2.769585  | -0.365516 |

|    |   |   |           |           |           |
|----|---|---|-----------|-----------|-----------|
| 36 | 6 | 0 | 4.283029  | -0.317331 | -1.907990 |
| 37 | 1 | 0 | 3.808776  | 0.083017  | -2.818372 |
| 38 | 1 | 0 | 5.343040  | -0.447555 | -2.109769 |
| 39 | 1 | 0 | 3.833242  | -1.294848 | -1.716975 |
| 40 | 6 | 0 | 4.821478  | 1.159603  | 1.643759  |
| 41 | 1 | 0 | 4.925461  | 0.708448  | 2.635677  |
| 42 | 1 | 0 | 5.763806  | 1.640647  | 1.390613  |
| 43 | 1 | 0 | 4.040026  | 1.925194  | 1.693369  |
| 44 | 6 | 0 | 5.519794  | -0.996177 | 0.596190  |
| 45 | 1 | 0 | 6.454793  | -0.604143 | 0.185160  |
| 46 | 1 | 0 | 5.712943  | -1.362459 | 1.609895  |
| 47 | 1 | 0 | 5.207624  | -1.855543 | -0.009463 |
| 48 | 6 | 0 | -3.982527 | 1.199634  | -1.703042 |
| 49 | 1 | 0 | -4.929493 | 1.046640  | -2.237312 |
| 50 | 1 | 0 | -3.680842 | 2.243210  | -1.847354 |
| 51 | 1 | 0 | -3.210436 | 0.567620  | -2.140464 |
| 52 | 6 | 0 | -5.152000 | 1.887244  | 0.388942  |
| 53 | 1 | 0 | -4.894918 | 2.919333  | 0.125381  |
| 54 | 1 | 0 | -6.157995 | 1.679487  | 0.009195  |
| 55 | 1 | 0 | -5.174741 | 1.820770  | 1.487560  |
| 56 | 6 | 0 | -5.059460 | -0.782881 | 1.462407  |
| 57 | 1 | 0 | -6.119335 | -0.504056 | 1.432760  |
| 58 | 1 | 0 | -4.995879 | -1.838337 | 1.739005  |
| 59 | 1 | 0 | -4.567461 | -0.189891 | 2.251628  |
| 60 | 6 | 0 | -5.086269 | -1.360060 | -0.968312 |
| 61 | 1 | 0 | -5.199166 | -2.402438 | -0.656279 |
| 62 | 1 | 0 | -6.075800 | -0.955162 | -1.168753 |
| 63 | 1 | 0 | -4.506693 | -1.357621 | -1.894349 |
| 64 | 5 | 0 | 0.142850  | -1.780823 | -0.714730 |
| 65 | 5 | 0 | -0.813491 | -1.896636 | -2.233159 |
| 66 | 5 | 0 | 0.940787  | -1.832968 | -2.333103 |
| 67 | 5 | 0 | 1.586504  | -2.796336 | -1.020048 |
| 68 | 6 | 0 | 0.243102  | -3.431481 | -0.273971 |
| 69 | 6 | 0 | -1.116114 | -2.913141 | -0.958970 |
| 70 | 5 | 0 | 0.049421  | -2.902169 | -3.412455 |
| 71 | 5 | 0 | -1.311732 | -3.563576 | -2.500821 |
| 72 | 1 | 0 | -1.566923 | -1.011415 | -2.436573 |
| 73 | 5 | 0 | 1.533522  | -3.466077 | -2.654330 |
| 74 | 1 | 0 | 1.497708  | -0.847014 | -2.698813 |
| 75 | 5 | 0 | 1.096973  | -4.472761 | -1.277753 |
| 76 | 1 | 0 | 2.534130  | -2.582046 | -0.348591 |

|     |    |   |           |           |           |
|-----|----|---|-----------|-----------|-----------|
| 77  | 5  | 0 | -0.661404 | -4.527348 | -1.186304 |
| 78  | 1  | 0 | 0.197152  | -3.623527 | 0.794977  |
| 79  | 1  | 0 | -1.970415 | -2.744657 | -0.314442 |
| 80  | 5  | 0 | 0.134736  | -4.545135 | -2.747861 |
| 81  | 1  | 0 | -0.046951 | -2.696684 | -4.566932 |
| 82  | 1  | 0 | -2.411488 | -3.798646 | -2.854652 |
| 83  | 1  | 0 | 2.540299  | -3.663150 | -3.244348 |
| 84  | 1  | 0 | 1.706093  | -5.346889 | -0.760965 |
| 85  | 1  | 0 | -1.267364 | -5.356410 | -0.602391 |
| 86  | 1  | 0 | 0.106819  | -5.524976 | -3.415711 |
| 87  | 77 | 0 | 0.012652  | -0.166821 | 0.768624  |
| 88  | 6  | 0 | -0.735089 | -1.656623 | 2.284012  |
| 89  | 6  | 0 | -0.683094 | 1.167425  | 2.486810  |
| 90  | 6  | 0 | 0.730008  | 1.240317  | 2.442069  |
| 91  | 6  | 0 | 0.674637  | -1.574145 | 2.410715  |
| 92  | 6  | 0 | -1.681193 | -1.053954 | 3.286588  |
| 93  | 1  | 0 | -1.166962 | -2.480630 | 1.721131  |
| 94  | 6  | 0 | -1.410155 | 0.428155  | 3.587221  |
| 95  | 1  | 0 | -1.214738 | 1.980138  | 2.003549  |
| 96  | 6  | 0 | 1.616222  | 0.555327  | 3.455458  |
| 97  | 1  | 0 | 1.146436  | 2.101167  | 1.940299  |
| 98  | 6  | 0 | 1.328469  | -0.934163 | 3.624406  |
| 99  | 1  | 0 | 1.285681  | -2.317450 | 1.907704  |
| 100 | 1  | 0 | -2.693436 | -1.167252 | 2.875861  |
| 101 | 1  | 0 | -1.661891 | -1.645715 | 4.221644  |
| 102 | 1  | 0 | -2.362328 | 0.936491  | 3.775707  |
| 103 | 1  | 0 | -0.831105 | 0.525722  | 4.514099  |
| 104 | 1  | 0 | 2.653050  | 0.685012  | 3.150505  |
| 105 | 1  | 0 | 1.512678  | 1.078666  | 4.414906  |
| 106 | 1  | 0 | 0.683006  | -1.104122 | 4.488109  |
| 107 | 1  | 0 | 2.260754  | -1.463776 | 3.831260  |
| 108 | 1  | 0 | 0.570337  | 0.072752  | -0.948764 |

---

**Int2**

---

| Center<br>Number | Atomic<br>Number | Atomic<br>Type | Coordinates (Angstroms) |           |           |
|------------------|------------------|----------------|-------------------------|-----------|-----------|
|                  |                  |                | X                       | Y         | Z         |
| 1                | 5                | 0              | 1.292524                | -0.518679 | -0.909294 |
| 2                | 5                | 0              | 0.171311                | 0.617719  | 1.175453  |
| 3                | 8                | 0              | -0.282362               | 1.450976  | 2.184482  |
| 4                | 8                | 0              | 1.246671                | -1.903434 | -1.037425 |
| 5                | 8                | 0              | 2.616778                | -0.080400 | -0.939867 |
| 6                | 8                | 0              | 1.028922                | -0.350748 | 1.684914  |
| 7                | 6                | 0              | 0.431090                | 1.154874  | 3.408850  |
| 8                | 6                | 0              | 1.106645                | -0.239225 | 3.125779  |
| 9                | 6                | 0              | 3.449323                | -1.185485 | -1.353776 |
| 10               | 6                | 0              | 2.590799                | -2.429827 | -0.967448 |
| 11               | 6                | 0              | 3.624803                | -1.045801 | -2.860076 |
| 12               | 1                | 0              | 4.053585                | -0.064696 | -3.084908 |
| 13               | 1                | 0              | 4.282113                | -1.815092 | -3.278975 |
| 14               | 1                | 0              | 2.648508                | -1.116917 | -3.351178 |
| 15               | 6                | 0              | 2.688620                | -3.600157 | -1.927223 |
| 16               | 1                | 0              | 3.712919                | -3.985578 | -1.978430 |
| 17               | 1                | 0              | 2.040954                | -4.413192 | -1.586200 |
| 18               | 1                | 0              | 2.370067                | -3.318935 | -2.933787 |
| 19               | 6                | 0              | 2.816510                | -2.893257 | 0.464213  |
| 20               | 1                | 0              | 2.060118                | -3.641806 | 0.722202  |
| 21               | 1                | 0              | 3.802993                | -3.349685 | 0.593788  |
| 22               | 1                | 0              | 2.712660                | -2.055198 | 1.157030  |
| 23               | 6                | 0              | 4.784001                | -1.088072 | -0.643317 |
| 24               | 1                | 0              | 5.416385                | -1.952069 | -0.875769 |
| 25               | 1                | 0              | 5.315299                | -0.187846 | -0.964173 |
| 26               | 1                | 0              | 4.655377                | -1.035416 | 0.440058  |
| 27               | 6                | 0              | 2.572512                | -0.316008 | 3.522475  |
| 28               | 1                | 0              | 2.699305                | -0.140542 | 4.596055  |
| 29               | 1                | 0              | 2.964444                | -1.313718 | 3.304234  |
| 30               | 1                | 0              | 3.180338                | 0.409600  | 2.977478  |
| 31               | 6                | 0              | 0.366604                | -1.430703 | 3.716682  |
| 32               | 1                | 0              | 0.819687                | -2.353706 | 3.340674  |
| 33               | 1                | 0              | 0.435498                | -1.444255 | 4.808811  |
| 34               | 1                | 0              | -0.688891               | -1.439486 | 3.439310  |
| 35               | 6                | 0              | 1.437237                | 2.280856  | 3.609789  |

---

|    |    |   |           |           |           |
|----|----|---|-----------|-----------|-----------|
| 36 | 1  | 0 | 0.904111  | 3.235376  | 3.647860  |
| 37 | 1  | 0 | 1.997260  | 2.168092  | 4.543080  |
| 38 | 1  | 0 | 2.155250  | 2.326787  | 2.784985  |
| 39 | 6  | 0 | -0.569061 | 1.146747  | 4.549427  |
| 40 | 1  | 0 | -0.083436 | 0.881927  | 5.494797  |
| 41 | 1  | 0 | -1.007912 | 2.141447  | 4.664018  |
| 42 | 1  | 0 | -1.381681 | 0.440705  | 4.367296  |
| 43 | 5  | 0 | -1.694513 | -0.727235 | -0.334463 |
| 44 | 5  | 0 | -2.408981 | -1.171282 | 1.243733  |
| 45 | 5  | 0 | -1.977350 | -3.623296 | -0.129207 |
| 46 | 5  | 0 | -3.054803 | -3.081646 | -1.409895 |
| 47 | 1  | 0 | -0.741059 | -2.399041 | -1.716783 |
| 48 | 5  | 0 | -2.540096 | -2.921939 | 1.382447  |
| 49 | 1  | 0 | -0.280517 | -2.241389 | 0.768748  |
| 50 | 5  | 0 | -3.973679 | -1.955551 | 1.036577  |
| 51 | 1  | 0 | -2.057384 | -0.541471 | 2.179740  |
| 52 | 5  | 0 | -4.288927 | -2.053538 | -0.691424 |
| 53 | 1  | 0 | -3.991126 | 0.442866  | 0.016609  |
| 54 | 1  | 0 | -2.923455 | -0.829429 | -2.598690 |
| 55 | 5  | 0 | -3.702133 | -3.485189 | 0.180861  |
| 56 | 1  | 0 | -1.266417 | -4.563546 | -0.205021 |
| 57 | 1  | 0 | -3.112891 | -3.731434 | -2.397296 |
| 58 | 1  | 0 | -2.231152 | -3.457802 | 2.391528  |
| 59 | 1  | 0 | -4.827935 | -1.827523 | 1.848128  |
| 60 | 1  | 0 | -5.377888 | -1.997609 | -1.156420 |
| 61 | 1  | 0 | -4.357213 | -4.456215 | 0.355839  |
| 62 | 77 | 0 | -0.299308 | 0.786147  | -0.818214 |
| 63 | 6  | 0 | -2.094228 | 2.337228  | -1.403452 |
| 64 | 6  | 0 | 0.805157  | 2.449532  | -1.999290 |
| 65 | 6  | 0 | 1.172470  | 2.591953  | -0.666234 |
| 66 | 6  | 0 | -1.728097 | 2.663745  | -0.124057 |
| 67 | 6  | 0 | -1.640019 | 3.060910  | -2.643693 |
| 68 | 1  | 0 | -2.903287 | 1.620247  | -1.533512 |
| 69 | 6  | 0 | -0.138225 | 3.406567  | -2.703984 |
| 70 | 1  | 0 | 1.480115  | 1.869673  | -2.630428 |
| 71 | 6  | 0 | 0.633761  | 3.657743  | 0.247258  |
| 72 | 1  | 0 | 2.098035  | 2.113066  | -0.351929 |
| 73 | 6  | 0 | -0.890659 | 3.873482  | 0.209934  |
| 74 | 1  | 0 | -2.233205 | 2.161878  | 0.698259  |
| 75 | 1  | 0 | -1.893951 | 2.445297  | -3.511511 |
| 76 | 1  | 0 | -2.224968 | 3.985971  | -2.759740 |

|    |   |   |           |           |           |
|----|---|---|-----------|-----------|-----------|
| 77 | 1 | 0 | 0.151695  | 3.462147  | -3.758388 |
| 78 | 1 | 0 | 0.028057  | 4.411394  | -2.295476 |
| 79 | 1 | 0 | 0.924470  | 3.408321  | 1.268388  |
| 80 | 1 | 0 | 1.138188  | 4.608573  | 0.014068  |
| 81 | 1 | 0 | -1.136843 | 4.667087  | -0.506227 |
| 82 | 1 | 0 | -1.203875 | 4.247705  | 1.189952  |
| 83 | 6 | 0 | -1.327030 | -2.190651 | 0.483865  |
| 84 | 6 | 0 | -1.617401 | -2.281103 | -1.088578 |
| 85 | 5 | 0 | -2.910804 | -1.329839 | -1.522935 |
| 86 | 5 | 0 | -3.473460 | -0.625354 | -0.024917 |

---

## Int2u

---

| Center<br>Number | Atomic<br>Number | Atomic<br>Type | Coordinates (Angstroms) |           |           |
|------------------|------------------|----------------|-------------------------|-----------|-----------|
|                  |                  |                | X                       | Y         | Z         |
| 1                | 5                | 0              | 1.347629                | -0.653430 | -0.913673 |
| 2                | 5                | 0              | 0.218475                | 0.589410  | 1.171215  |
| 3                | 8                | 0              | -0.308138               | 1.435843  | 2.137780  |
| 4                | 8                | 0              | 1.306673                | -2.009506 | -1.192255 |
| 5                | 8                | 0              | 2.666195                | -0.216671 | -0.787589 |
| 6                | 8                | 0              | 1.105452                | -0.310261 | 1.728610  |
| 7                | 6                | 0              | 0.365985                | 1.183397  | 3.397583  |
| 8                | 6                | 0              | 1.070579                | -0.203022 | 3.169696  |
| 9                | 6                | 0              | 3.534640                | -1.307536 | -1.168026 |
| 10               | 6                | 0              | 2.626507                | -2.548427 | -0.927235 |
| 11               | 6                | 0              | 3.882157                | -1.100233 | -2.637318 |
| 12               | 1                | 0              | 4.350531                | -0.119357 | -2.759779 |
| 13               | 1                | 0              | 4.579741                | -1.859565 | -3.006258 |
| 14               | 1                | 0              | 2.978571                | -1.118321 | -3.256929 |
| 15               | 6                | 0              | 2.882470                | -3.721311 | -1.850930 |
| 16               | 1                | 0              | 3.877328                | -4.143114 | -1.669963 |
| 17               | 1                | 0              | 2.145173                | -4.507141 | -1.663468 |
| 18               | 1                | 0              | 2.817134                | -3.441920 | -2.902963 |
| 19               | 6                | 0              | 2.635118                | -3.018808 | 0.521261  |
| 20               | 1                | 0              | 1.840875                | -3.757247 | 0.661215  |
| 21               | 1                | 0              | 3.590447                | -3.483247 | 0.787382  |
| 22               | 1                | 0              | 2.437283                | -2.183190 | 1.196437  |
| 23               | 6                | 0              | 4.780235                | -1.256889 | -0.306341 |
| 24               | 1                | 0              | 5.423378                | -2.124071 | -0.493576 |

|    |   |   |           |           |           |
|----|---|---|-----------|-----------|-----------|
| 25 | 1 | 0 | 5.358493  | -0.356307 | -0.531637 |
| 26 | 1 | 0 | 4.524539  | -1.237556 | 0.755507  |
| 27 | 6 | 0 | 2.501964  | -0.274826 | 3.675763  |
| 28 | 1 | 0 | 2.545059  | -0.118258 | 4.759080  |
| 29 | 1 | 0 | 2.915356  | -1.266008 | 3.467471  |
| 30 | 1 | 0 | 3.144661  | 0.463205  | 3.191274  |
| 31 | 6 | 0 | 0.289282  | -1.395623 | 3.701579  |
| 32 | 1 | 0 | 0.765876  | -2.316935 | 3.355372  |
| 33 | 1 | 0 | 0.276364  | -1.406699 | 4.796126  |
| 34 | 1 | 0 | -0.741055 | -1.405831 | 3.342095  |
| 35 | 6 | 0 | 1.349649  | 2.326320  | 3.608807  |
| 36 | 1 | 0 | 0.808651  | 3.277325  | 3.588580  |
| 37 | 1 | 0 | 1.862520  | 2.247950  | 4.572347  |
| 38 | 1 | 0 | 2.109849  | 2.349591  | 2.821863  |
| 39 | 6 | 0 | -0.675141 | 1.186173  | 4.500381  |
| 40 | 1 | 0 | -0.220448 | 0.945956  | 5.467496  |
| 41 | 1 | 0 | -1.130314 | 2.177237  | 4.580302  |
| 42 | 1 | 0 | -1.470231 | 0.464095  | 4.303907  |
| 43 | 5 | 0 | -1.587101 | -0.814131 | -0.305262 |
| 44 | 5 | 0 | -1.793295 | -2.365126 | -1.181763 |
| 45 | 5 | 0 | -1.487204 | -2.385038 | 0.545101  |
| 46 | 5 | 0 | -2.445233 | -1.093251 | 1.250694  |
| 47 | 6 | 0 | -3.287174 | -0.445766 | -0.018044 |
| 48 | 6 | 0 | -2.921006 | -1.155965 | -1.390492 |
| 49 | 5 | 0 | -2.619247 | -3.551531 | -0.165654 |
| 50 | 5 | 0 | -3.497769 | -2.731187 | -1.451817 |
| 51 | 1 | 0 | -1.040363 | -2.586324 | -2.063981 |
| 52 | 5 | 0 | -3.020192 | -2.759231 | 1.354388  |
| 53 | 1 | 0 | -0.440605 | -2.702921 | 0.997604  |
| 54 | 5 | 0 | -4.153428 | -1.458599 | 1.003435  |
| 55 | 1 | 0 | -2.175999 | -0.376155 | 2.150648  |
| 56 | 5 | 0 | -4.453293 | -1.447726 | -0.725529 |
| 57 | 1 | 0 | -3.526074 | 0.611139  | -0.061983 |
| 58 | 1 | 0 | -2.939481 | -0.545258 | -2.286753 |
| 59 | 5 | 0 | -4.273065 | -2.976598 | 0.115406  |
| 60 | 1 | 0 | -2.363319 | -4.705978 | -0.249591 |
| 61 | 1 | 0 | -3.844506 | -3.149807 | -2.502980 |
| 62 | 1 | 0 | -3.053697 | -3.323944 | 2.396957  |
| 63 | 1 | 0 | -4.963913 | -0.966639 | 1.709747  |
| 64 | 1 | 0 | -5.381184 | -0.930568 | -1.240296 |
| 65 | 1 | 0 | -5.206912 | -3.694207 | 0.240700  |



|    |    |   |           |          |           |
|----|----|---|-----------|----------|-----------|
| 66 | 77 | 0 | -0.212747 | 0.701248 | -0.838362 |
| 67 | 6  | 0 | -1.913280 | 2.329194 | -1.525461 |
| 68 | 6  | 0 | 1.002545  | 2.279491 | -2.025986 |
| 69 | 6  | 0 | 1.329894  | 2.454166 | -0.687954 |
| 70 | 6  | 0 | -1.574934 | 2.679659 | -0.244436 |
| 71 | 6  | 0 | -1.390435 | 3.007278 | -2.766047 |
| 72 | 1  | 0 | -2.756962 | 1.658058 | -1.682617 |
| 73 | 6  | 0 | 0.133156  | 3.256682 | -2.795849 |
| 74 | 1  | 0 | 1.657822  | 1.635495 | -2.611606 |
| 75 | 6  | 0 | 0.813212  | 3.570462 | 0.175191  |
| 76 | 1  | 0 | 2.213196  | 1.935242 | -0.321861 |
| 77 | 6  | 0 | -0.694481 | 3.861638 | 0.071434  |
| 78 | 1  | 0 | -2.108640 | 2.230379 | 0.589948  |
| 79 | 1  | 0 | -1.674407 | 2.395288 | -3.629735 |
| 80 | 1  | 0 | -1.913191 | 3.965207 | -2.907701 |
| 81 | 1  | 0 | 0.457065  | 3.258250 | -3.842120 |
| 82 | 1  | 0 | 0.342632  | 4.268128 | -2.425710 |
| 83 | 1  | 0 | 1.048391  | 3.333902 | 1.213278  |
| 84 | 1  | 0 | 1.373667  | 4.488797 | -0.058948 |
| 85 | 1  | 0 | -0.875691 | 4.635203 | -0.684768 |
| 86 | 1  | 0 | -1.024595 | 4.290635 | 1.023188  |

---

### Int3

| Center<br>Number | Atomic<br>Number | Atomic<br>Type | Coordinates (Angstroms) |           |           |
|------------------|------------------|----------------|-------------------------|-----------|-----------|
|                  |                  |                | X                       | Y         | Z         |
| 1                | 5                | 0              | 1.828371                | 0.749786  | -0.890119 |
| 2                | 8                | 0              | 2.953701                | -0.048257 | -1.038217 |
| 3                | 8                | 0              | 2.125681                | 1.931441  | -0.232105 |
| 4                | 6                | 0              | 4.058609                | 0.567783  | -0.336236 |
| 5                | 6                | 0              | 3.562831                | 2.043021  | -0.129478 |
| 6                | 6                | 0              | 4.006985                | 2.996572  | -1.234586 |
| 7                | 1                | 0              | 3.506938                | 3.959270  | -1.098239 |
| 8                | 1                | 0              | 5.083827                | 3.172568  | -1.215654 |
| 9                | 1                | 0              | 3.731512                | 2.612420  | -2.218139 |
| 10               | 6                | 0              | 3.880567                | 2.630072  | 1.238343  |
| 11               | 1                | 0              | 4.961364                | 2.673274  | 1.403163  |
| 12               | 1                | 0              | 3.485634                | 3.645358  | 1.302644  |
| 13               | 1                | 0              | 3.422452                | 2.036003  | 2.032701  |

|    |   |   |           |           |           |
|----|---|---|-----------|-----------|-----------|
| 14 | 6 | 0 | 5.285943  | 0.438370  | -1.225909 |
| 15 | 1 | 0 | 6.154715  | 0.924747  | -0.772448 |
| 16 | 1 | 0 | 5.530458  | -0.627926 | -1.357244 |
| 17 | 1 | 0 | 5.124992  | 0.875486  | -2.216670 |
| 18 | 6 | 0 | 4.282417  | -0.185759 | 0.954732  |
| 19 | 1 | 0 | 4.506301  | -1.236315 | 0.734618  |
| 20 | 1 | 0 | 5.121201  | 0.233436  | 1.527807  |
| 21 | 1 | 0 | 3.379119  | -0.166363 | 1.571100  |
| 22 | 5 | 0 | -0.686608 | 1.861159  | -0.260229 |
| 23 | 8 | 0 | -0.889660 | 2.209306  | 1.064182  |
| 24 | 8 | 0 | -0.786634 | 2.975835  | -1.079453 |
| 25 | 6 | 0 | -0.871164 | 4.167279  | -0.272674 |
| 26 | 6 | 0 | -1.246802 | 3.617751  | 1.154647  |
| 27 | 6 | 0 | -1.922007 | 5.086729  | -0.883995 |
| 28 | 1 | 0 | -2.058534 | 5.977831  | -0.267459 |
| 29 | 1 | 0 | -1.602527 | 5.397642  | -1.876452 |
| 30 | 1 | 0 | -2.882500 | 4.581174  | -0.984424 |
| 31 | 6 | 0 | 0.501748  | 4.824617  | -0.337976 |
| 32 | 1 | 0 | 0.743955  | 5.033164  | -1.383582 |
| 33 | 1 | 0 | 0.525171  | 5.775742  | 0.211883  |
| 34 | 1 | 0 | 1.274141  | 4.160564  | 0.059460  |
| 35 | 6 | 0 | -0.437521 | 4.234851  | 2.281988  |
| 36 | 1 | 0 | -0.558472 | 5.322710  | 2.300509  |
| 37 | 1 | 0 | -0.775959 | 3.855315  | 3.246646  |
| 38 | 1 | 0 | 0.627224  | 4.013430  | 2.171310  |
| 39 | 6 | 0 | -2.727216 | 3.693079  | 1.480139  |
| 40 | 1 | 0 | -2.919401 | 3.161032  | 2.422058  |
| 41 | 1 | 0 | -3.051188 | 4.727515  | 1.618780  |
| 42 | 1 | 0 | -3.343911 | 3.232222  | 0.706039  |
| 43 | 5 | 0 | -2.300444 | -0.501535 | -0.649831 |
| 44 | 5 | 0 | -3.603204 | 0.741275  | -0.646141 |
| 45 | 5 | 0 | -3.703596 | -0.558437 | -1.801447 |
| 46 | 5 | 0 | -3.196797 | -2.022998 | -0.993226 |
| 47 | 6 | 0 | -2.895659 | -1.556209 | 0.565114  |
| 48 | 6 | 0 | -3.127844 | 0.013621  | 0.764154  |
| 49 | 5 | 0 | -5.175826 | 0.019847  | -0.998943 |
| 50 | 5 | 0 | -4.755549 | 0.422252  | 0.654934  |
| 51 | 1 | 0 | -3.281406 | 1.855726  | -0.867632 |
| 52 | 5 | 0 | -4.920474 | -1.705117 | -1.219145 |
| 53 | 1 | 0 | -3.524423 | -0.359990 | -2.957727 |
| 54 | 5 | 0 | -4.338782 | -2.365864 | 0.301624  |

|    |    |   |           |           |           |
|----|----|---|-----------|-----------|-----------|
| 55 | 1  | 0 | -2.595639 | -2.946807 | -1.441709 |
| 56 | 5  | 0 | -4.241044 | -1.043284 | 1.458416  |
| 57 | 1  | 0 | -2.478763 | 0.519740  | 1.472924  |
| 58 | 5  | 0 | -5.570807 | -1.097655 | 0.313569  |
| 59 | 1  | 0 | -6.002372 | 0.632853  | -1.589032 |
| 60 | 1  | 0 | -5.140594 | 1.322206  | 1.332919  |
| 61 | 1  | 0 | -5.568377 | -2.371812 | -1.965250 |
| 62 | 1  | 0 | -4.438041 | -3.464372 | 0.727983  |
| 63 | 1  | 0 | -4.205341 | -1.195140 | 2.631201  |
| 64 | 1  | 0 | -6.679571 | -1.315629 | 0.687553  |
| 65 | 77 | 0 | -0.207311 | 0.015013  | -1.059263 |
| 66 | 6  | 0 | 1.103520  | -1.715018 | -2.598219 |
| 67 | 6  | 0 | 0.928933  | 1.115534  | -2.642406 |
| 68 | 6  | 0 | -0.507304 | 0.860871  | -2.939220 |
| 69 | 6  | 0 | -0.213012 | -2.001914 | -2.726756 |
| 70 | 6  | 0 | 1.920250  | -1.019453 | -3.652244 |
| 71 | 1  | 0 | 1.654284  | -2.153037 | -1.766160 |
| 72 | 6  | 0 | 1.962508  | 0.513566  | -3.587156 |
| 73 | 1  | 0 | 1.099927  | 2.170453  | -2.426741 |
| 74 | 6  | 0 | -0.927254 | 0.000155  | -4.122294 |
| 75 | 1  | 0 | -1.131165 | 1.751059  | -2.842918 |
| 76 | 6  | 0 | -1.047006 | -1.515334 | -3.872185 |
| 77 | 1  | 0 | -0.676153 | -2.676173 | -2.024257 |
| 78 | 1  | 0 | 2.950249  | -1.401592 | -3.604294 |
| 79 | 1  | 0 | 1.531982  | -1.324292 | -4.632727 |
| 80 | 1  | 0 | 2.956920  | 0.839766  | -3.284350 |
| 81 | 1  | 0 | 1.790955  | 0.939691  | -4.585268 |
| 82 | 1  | 0 | -1.897032 | 0.366831  | -4.475435 |
| 83 | 1  | 0 | -0.227842 | 0.187667  | -4.942181 |
| 84 | 1  | 0 | -0.777724 | -2.057359 | -4.790786 |
| 85 | 1  | 0 | -2.090342 | -1.768774 | -3.674717 |
| 86 | 5  | 0 | 0.623612  | -1.780237 | 0.438730  |
| 87 | 5  | 0 | 0.211623  | -0.409334 | 1.502183  |
| 88 | 8  | 0 | -0.204749 | -2.842106 | 0.133765  |
| 89 | 8  | 0 | 1.879509  | -2.206413 | 0.837808  |
| 90 | 8  | 0 | 1.175463  | 0.365474  | 2.105414  |
| 91 | 6  | 0 | 1.940309  | -3.664425 | 0.779901  |
| 92 | 6  | 0 | 0.453847  | -4.094762 | 0.469932  |
| 93 | 8  | 0 | -0.729012 | -0.850091 | 2.408555  |
| 94 | 6  | 0 | 1.030921  | 0.225218  | 3.549429  |
| 95 | 6  | 0 | -0.455168 | -0.258730 | 3.721561  |

|     |   |   |           |           |           |
|-----|---|---|-----------|-----------|-----------|
| 96  | 6 | 0 | 0.298276  | -5.033365 | -0.709065 |
| 97  | 1 | 0 | 0.779340  | -5.995591 | -0.505511 |
| 98  | 1 | 0 | -0.759376 | -5.209779 | -0.907562 |
| 99  | 1 | 0 | 0.733619  | -4.613402 | -1.622958 |
| 100 | 6 | 0 | -0.314957 | -4.633768 | 1.670621  |
| 101 | 1 | 0 | -1.360664 | -4.801778 | 1.375999  |
| 102 | 1 | 0 | 0.095764  | -5.571964 | 2.030930  |
| 103 | 1 | 0 | -0.321273 | -3.904231 | 2.496204  |
| 104 | 6 | 0 | 2.466168  | -4.156966 | 2.131859  |
| 105 | 1 | 0 | 2.569588  | -5.242302 | 2.138450  |
| 106 | 1 | 0 | 3.449269  | -3.719120 | 2.325144  |
| 107 | 1 | 0 | 1.808643  | -3.863382 | 2.963001  |
| 108 | 6 | 0 | 2.956032  | -4.047367 | -0.295434 |
| 109 | 1 | 0 | 3.918882  | -3.601509 | -0.043287 |
| 110 | 1 | 0 | 3.075805  | -5.133113 | -0.349796 |
| 111 | 1 | 0 | 2.668702  | -3.690227 | -1.286476 |
| 112 | 1 | 0 | -2.119136 | -1.996816 | 1.171999  |
| 113 | 6 | 0 | -1.455254 | 0.862983  | 3.942167  |
| 114 | 1 | 0 | -2.474186 | 0.467697  | 3.889894  |
| 115 | 1 | 0 | -1.330852 | 1.317871  | 4.927561  |
| 116 | 1 | 0 | -1.345093 | 1.635615  | 3.177574  |
| 117 | 6 | 0 | -0.657579 | -1.345663 | 4.772637  |
| 118 | 1 | 0 | -1.698929 | -1.664354 | 4.770872  |
| 119 | 1 | 0 | -0.030140 | -2.221774 | 4.581657  |
| 120 | 1 | 0 | -0.418417 | -0.956897 | 5.769062  |
| 121 | 6 | 0 | 1.321452  | 1.554230  | 4.213430  |
| 122 | 1 | 0 | 0.702918  | 2.358611  | 3.801471  |
| 123 | 1 | 0 | 1.144443  | 1.496921  | 5.301069  |
| 124 | 1 | 0 | 2.369933  | 1.830443  | 4.067544  |
| 125 | 6 | 0 | 2.050906  | -0.813482 | 3.987071  |
| 126 | 1 | 0 | 1.902466  | -1.762832 | 3.458832  |
| 127 | 1 | 0 | 3.053139  | -0.457666 | 3.745799  |
| 128 | 1 | 0 | 2.006827  | -1.003024 | 5.063191  |

---

### Int3u

---

| Center<br>Number | Atomic<br>Number | Atomic<br>Type | Coordinates (Angstroms) |          |           |
|------------------|------------------|----------------|-------------------------|----------|-----------|
|                  |                  |                | X                       | Y        | Z         |
| 1                | 5                | 0              | 1.719131                | 0.651814 | -1.149104 |

---

|    |   |   |           |           |           |
|----|---|---|-----------|-----------|-----------|
| 2  | 8 | 0 | 2.779310  | -0.232681 | -1.326157 |
| 3  | 8 | 0 | 2.156811  | 1.847317  | -0.615193 |
| 4  | 6 | 0 | 3.991156  | 0.366725  | -0.834170 |
| 5  | 6 | 0 | 3.591469  | 1.884831  | -0.640806 |
| 6  | 6 | 0 | 3.994958  | 2.769665  | -1.812648 |
| 7  | 1 | 0 | 3.568891  | 3.772674  | -1.662283 |
| 8  | 1 | 0 | 5.074186  | 2.870154  | -1.907052 |
| 9  | 1 | 0 | 3.600309  | 2.384168  | -2.762224 |
| 10 | 6 | 0 | 4.065672  | 2.497436  | 0.666460  |
| 11 | 1 | 0 | 5.160409  | 2.521314  | 0.723613  |
| 12 | 1 | 0 | 3.698773  | 3.521869  | 0.745076  |
| 13 | 1 | 0 | 3.680027  | 1.931464  | 1.516055  |
| 14 | 6 | 0 | 5.077209  | 0.121473  | -1.868229 |
| 15 | 1 | 0 | 6.029660  | 0.578473  | -1.559680 |
| 16 | 1 | 0 | 5.242921  | -0.948378 | -1.970792 |
| 17 | 1 | 0 | 4.806615  | 0.519168  | -2.852944 |
| 18 | 6 | 0 | 4.367479  | -0.331466 | 0.465368  |
| 19 | 1 | 0 | 4.530708  | -1.388384 | 0.276101  |
| 20 | 1 | 0 | 5.284213  | 0.089799  | 0.892976  |
| 21 | 1 | 0 | 3.553221  | -0.259790 | 1.197288  |
| 22 | 5 | 0 | -0.675975 | 1.886705  | -0.218752 |
| 23 | 8 | 0 | -0.640881 | 2.356159  | 1.085958  |
| 24 | 8 | 0 | -0.925085 | 2.926664  | -1.104981 |
| 25 | 6 | 0 | -0.856664 | 4.182055  | -0.384567 |
| 26 | 6 | 0 | -1.083041 | 3.734630  | 1.093133  |
| 27 | 6 | 0 | -1.920749 | 5.114617  | -0.934156 |
| 28 | 1 | 0 | -1.953409 | 6.044396  | -0.363518 |
| 29 | 1 | 0 | -1.693094 | 5.365013  | -1.972676 |
| 30 | 1 | 0 | -2.914709 | 4.651593  | -0.911386 |
| 31 | 6 | 0 | 0.533815  | 4.760836  | -0.640608 |
| 32 | 1 | 0 | 0.684169  | 4.869421  | -1.718892 |
| 33 | 1 | 0 | 0.655311  | 5.741271  | -0.179401 |
| 34 | 1 | 0 | 1.303511  | 4.077030  | -0.267091 |
| 35 | 6 | 0 | -0.243884 | 4.510077  | 2.100313  |
| 36 | 1 | 0 | -0.471842 | 5.574520  | 2.049596  |
| 37 | 1 | 0 | -0.479771 | 4.169918  | 3.115341  |
| 38 | 1 | 0 | 0.823602  | 4.365852  | 1.926455  |
| 39 | 6 | 0 | -2.541357 | 3.753757  | 1.515482  |
| 40 | 1 | 0 | -2.648822 | 3.274633  | 2.487898  |
| 41 | 1 | 0 | -2.924437 | 4.779741  | 1.598780  |
| 42 | 1 | 0 | -3.168816 | 3.212996  | 0.811148  |

|    |    |   |           |           |           |
|----|----|---|-----------|-----------|-----------|
| 43 | 5  | 0 | -2.325234 | -0.435638 | -0.141917 |
| 44 | 5  | 0 | -3.674972 | 0.736969  | -0.351740 |
| 45 | 5  | 0 | -5.158727 | -0.081491 | -0.853510 |
| 46 | 5  | 0 | -4.971587 | 0.435623  | 0.814623  |
| 47 | 1  | 0 | -3.401184 | 1.768020  | -0.868264 |
| 48 | 5  | 0 | -4.807712 | -1.798236 | -0.950605 |
| 49 | 1  | 0 | -3.310830 | -0.604316 | -2.313013 |
| 50 | 5  | 0 | -4.392354 | -2.354461 | 0.671115  |
| 51 | 1  | 0 | -2.611583 | -2.684664 | -0.920839 |
| 52 | 5  | 0 | -4.491890 | -0.975049 | 1.759613  |
| 53 | 1  | 0 | -2.711185 | 0.883178  | 2.026912  |
| 54 | 5  | 0 | -5.674371 | -1.155543 | 0.441797  |
| 55 | 1  | 0 | -5.828021 | 0.390036  | -1.712228 |
| 56 | 1  | 0 | -5.602289 | 1.327545  | 1.261086  |
| 57 | 1  | 0 | -5.154449 | -2.507068 | -1.829715 |
| 58 | 1  | 0 | -4.519848 | -3.504056 | 0.910666  |
| 59 | 1  | 0 | -4.785058 | -1.130259 | 2.902015  |
| 60 | 1  | 0 | -6.810592 | -1.425486 | 0.605756  |
| 61 | 77 | 0 | -0.351824 | -0.009656 | -0.947728 |
| 62 | 6  | 0 | 0.803382  | -1.918974 | -2.657148 |
| 63 | 6  | 0 | 0.646689  | 0.940672  | -2.721692 |
| 64 | 6  | 0 | -0.825600 | 0.710869  | -2.835799 |
| 65 | 6  | 0 | -0.525790 | -2.173537 | -2.642154 |
| 66 | 6  | 0 | 1.503309  | -1.248600 | -3.811845 |
| 67 | 1  | 0 | 1.419943  | -2.296764 | -1.856320 |
| 68 | 6  | 0 | 1.544819  | 0.295921  | -3.777418 |
| 69 | 1  | 0 | 0.847094  | 2.001351  | -2.621983 |
| 70 | 6  | 0 | -1.400621 | -0.169099 | -3.938976 |
| 71 | 1  | 0 | -1.391737 | 1.637521  | -2.757587 |
| 72 | 6  | 0 | -1.456785 | -1.694630 | -3.714409 |
| 73 | 1  | 0 | -0.909994 | -2.796062 | -1.847657 |
| 74 | 1  | 0 | 2.524891  | -1.633790 | -3.863562 |
| 75 | 1  | 0 | 1.007600  | -1.576479 | -4.735417 |
| 76 | 1  | 0 | 2.580322  | 0.623492  | -3.626154 |
| 77 | 1  | 0 | 1.241980  | 0.690911  | -4.755398 |
| 78 | 1  | 0 | -2.411174 | 0.179265  | -4.163790 |
| 79 | 1  | 0 | -0.831265 | 0.039079  | -4.857257 |
| 80 | 1  | 0 | -1.228834 | -2.214451 | -4.660816 |
| 81 | 1  | 0 | -2.473214 | -2.018297 | -3.467844 |
| 82 | 5  | 0 | 0.666000  | -1.745078 | 0.575583  |
| 83 | 5  | 0 | 0.411053  | -0.308406 | 1.574983  |

|     |   |   |           |           |           |
|-----|---|---|-----------|-----------|-----------|
| 84  | 8 | 0 | -0.164487 | -2.792437 | 0.238661  |
| 85  | 8 | 0 | 1.912990  | -2.205006 | 0.970090  |
| 86  | 8 | 0 | 1.459942  | 0.507812  | 1.949546  |
| 87  | 6 | 0 | 1.956659  | -3.653898 | 0.892679  |
| 88  | 6 | 0 | 0.447450  | -4.054351 | 0.641352  |
| 89  | 8 | 0 | -0.393128 | -0.650343 | 2.633146  |
| 90  | 6 | 0 | 1.505895  | 0.528149  | 3.404149  |
| 91  | 6 | 0 | 0.079284  | 0.017366  | 3.829048  |
| 92  | 6 | 0 | 0.235902  | -5.065115 | -0.468218 |
| 93  | 1 | 0 | 0.693849  | -6.023567 | -0.218529 |
| 94  | 1 | 0 | -0.841217 | -5.235076 | -0.602550 |
| 95  | 1 | 0 | 0.641310  | -4.715280 | -1.414182 |
| 96  | 6 | 0 | -0.288483 | -4.471733 | 1.908891  |
| 97  | 1 | 0 | -1.358033 | -4.602500 | 1.666079  |
| 98  | 1 | 0 | 0.093093  | -5.418056 | 2.308629  |
| 99  | 1 | 0 | -0.230167 | -3.696762 | 2.677052  |
| 100 | 6 | 0 | 2.523384  | -4.176684 | 2.205941  |
| 101 | 1 | 0 | 2.567488  | -5.271895 | 2.212452  |
| 102 | 1 | 0 | 3.546466  | -3.791653 | 2.333690  |
| 103 | 1 | 0 | 1.932118  | -3.848476 | 3.068941  |
| 104 | 6 | 0 | 2.904056  | -4.027772 | -0.248792 |
| 105 | 1 | 0 | 3.900695  | -3.637347 | -0.022138 |
| 106 | 1 | 0 | 2.984012  | -5.123834 | -0.353041 |
| 107 | 1 | 0 | 2.595091  | -3.613788 | -1.210605 |
| 108 | 1 | 0 | -2.132959 | -2.134633 | 1.771799  |
| 109 | 6 | 0 | -0.907758 | 1.137941  | 4.150270  |
| 110 | 1 | 0 | -1.901459 | 0.708699  | 4.292491  |
| 111 | 1 | 0 | -0.622590 | 1.677125  | 5.059735  |
| 112 | 1 | 0 | -0.972026 | 1.841426  | 3.315532  |
| 113 | 6 | 0 | 0.090410  | -1.008638 | 4.948242  |
| 114 | 1 | 0 | -0.931446 | -1.327730 | 5.157210  |
| 115 | 1 | 0 | 0.676570  | -1.903529 | 4.679855  |
| 116 | 1 | 0 | 0.507600  | -0.592837 | 5.875192  |
| 117 | 6 | 0 | 1.820696  | 1.942513  | 3.858668  |
| 118 | 1 | 0 | 1.119532  | 2.656770  | 3.434219  |
| 119 | 1 | 0 | 1.786846  | 2.012438  | 4.957841  |
| 120 | 1 | 0 | 2.828839  | 2.229321  | 3.540776  |
| 121 | 6 | 0 | 2.636531  | -0.409800 | 3.810753  |
| 122 | 1 | 0 | 2.486426  | -1.413145 | 3.395467  |
| 123 | 1 | 0 | 3.586123  | -0.026216 | 3.419978  |
| 124 | 1 | 0 | 2.728878  | -0.484936 | 4.899592  |

|     |   |   |           |           |           |
|-----|---|---|-----------|-----------|-----------|
| 125 | 6 | 0 | -3.627572 | -0.636586 | -1.285825 |
| 126 | 5 | 0 | -2.922149 | -1.518071 | 1.164621  |
| 127 | 5 | 0 | -3.268660 | 0.190619  | 1.255761  |
| 128 | 6 | 0 | -3.195811 | -1.911526 | -0.430337 |

---

#### Int4

| Center<br>Number | Atomic<br>Number | Atomic<br>Type | Coordinates (Angstroms) |           |           |
|------------------|------------------|----------------|-------------------------|-----------|-----------|
|                  |                  |                | X                       | Y         | Z         |
| 1                | 5                | 0              | -0.632303               | -0.110116 | 1.569153  |
| 2                | 5                | 0              | -0.592242               | 2.396925  | -0.199485 |
| 3                | 5                | 0              | -1.999199               | -1.679332 | -0.045180 |
| 4                | 8                | 0              | -2.999469               | -2.393395 | -0.688565 |
| 5                | 8                | 0              | 0.555782                | 2.422567  | 0.609066  |
| 6                | 8                | 0              | -0.807274               | 3.617836  | -0.778181 |
| 7                | 8                | 0              | 0.644324                | -0.614305 | 1.732276  |
| 8                | 8                | 0              | -1.216166               | 0.241903  | 2.763568  |
| 9                | 8                | 0              | -1.290323               | -2.514857 | 0.816915  |
| 10               | 6                | 0              | 0.102492                | 4.579208  | -0.145918 |
| 11               | 6                | 0              | 1.253000                | 3.672286  | 0.372481  |
| 12               | 6                | 0              | -3.086966               | -3.732971 | -0.126307 |
| 13               | 6                | 0              | -1.719202               | -3.887394 | 0.637066  |
| 14               | 6                | 0              | -0.166090               | 0.211860  | 3.789308  |
| 15               | 6                | 0              | 0.897650                | -0.741693 | 3.151353  |
| 16               | 6                | 0              | 0.317898                | 1.642721  | 3.935617  |
| 17               | 1                | 0              | -0.523395               | 2.282347  | 4.231527  |
| 18               | 1                | 0              | 1.088545                | 1.729438  | 4.709226  |
| 19               | 1                | 0              | 0.714922                | 2.017912  | 2.989483  |
| 20               | 6                | 0              | 2.338879                | -0.331013 | 3.388379  |
| 21               | 1                | 0              | 2.581400                | -0.300418 | 4.459327  |
| 22               | 1                | 0              | 3.013669                | -1.053541 | 2.910376  |
| 23               | 1                | 0              | 2.548461                | 0.650766  | 2.942604  |
| 24               | 6                | 0              | 0.682511                | -2.208772 | 3.493644  |
| 25               | 1                | 0              | 1.322550                | -2.821681 | 2.852058  |
| 26               | 1                | 0              | 0.927405                | -2.428254 | 4.536651  |
| 27               | 1                | 0              | -0.355996               | -2.503572 | 3.289061  |
| 28               | 6                | 0              | -0.773891               | -0.297661 | 5.081739  |
| 29               | 1                | 0              | 0.000794                | -0.392490 | 5.847527  |
| 30               | 1                | 0              | -1.519054               | 0.418474  | 5.446817  |



|    |   |   |           |           |           |
|----|---|---|-----------|-----------|-----------|
| 31 | 1 | 0 | -1.257458 | -1.265856 | 4.947619  |
| 32 | 6 | 0 | -1.843616 | -4.545255 | 1.997335  |
| 33 | 1 | 0 | -2.268293 | -5.555975 | 1.907347  |
| 34 | 1 | 0 | -0.851088 | -4.651092 | 2.448263  |
| 35 | 1 | 0 | -2.465202 | -3.968133 | 2.676675  |
| 36 | 6 | 0 | -0.639405 | -4.598462 | -0.171584 |
| 37 | 1 | 0 | 0.314031  | -4.500879 | 0.365226  |
| 38 | 1 | 0 | -0.855870 | -5.657955 | -0.288224 |
| 39 | 1 | 0 | -0.510371 | -4.162515 | -1.159125 |
| 40 | 6 | 0 | -4.290139 | -3.741570 | 0.797884  |
| 41 | 1 | 0 | -5.187520 | -3.465199 | 0.231866  |
| 42 | 1 | 0 | -4.469283 | -4.738592 | 1.232956  |
| 43 | 1 | 0 | -4.174475 | -3.035282 | 1.618578  |
| 44 | 6 | 0 | -3.296025 | -4.718495 | -1.262538 |
| 45 | 1 | 0 | -3.299563 | -5.746410 | -0.883413 |
| 46 | 1 | 0 | -4.251178 | -4.524652 | -1.745702 |
| 47 | 1 | 0 | -2.508501 | -4.625363 | -2.013469 |
| 48 | 6 | 0 | 2.338499  | 3.398331  | -0.654075 |
| 49 | 1 | 0 | 2.953436  | 4.282898  | -0.834202 |
| 50 | 1 | 0 | 2.981944  | 2.593879  | -0.293292 |
| 51 | 1 | 0 | 1.905291  | 3.075528  | -1.609149 |
| 52 | 6 | 0 | 1.885675  | 4.139504  | 1.675678  |
| 53 | 1 | 0 | 2.649375  | 3.423638  | 1.984245  |
| 54 | 1 | 0 | 2.374739  | 5.104316  | 1.531476  |
| 55 | 1 | 0 | 1.159300  | 4.233591  | 2.475181  |
| 56 | 6 | 0 | -0.683716 | 5.242911  | 0.977692  |
| 57 | 1 | 0 | -0.106517 | 6.031842  | 1.463231  |
| 58 | 1 | 0 | -1.599660 | 5.679350  | 0.559931  |
| 59 | 1 | 0 | -0.978279 | 4.507782  | 1.738115  |
| 60 | 6 | 0 | 0.511213  | 5.585977  | -1.198781 |
| 61 | 1 | 0 | -0.356426 | 6.166948  | -1.513784 |
| 62 | 1 | 0 | 1.251763  | 6.284700  | -0.792633 |
| 63 | 1 | 0 | 0.927881  | 5.105791  | -2.080713 |
| 64 | 5 | 0 | -0.305738 | -0.211499 | -1.791151 |
| 65 | 5 | 0 | -0.187214 | -1.797268 | -2.614749 |
| 66 | 5 | 0 | 2.495902  | -1.057681 | -1.991277 |
| 67 | 5 | 0 | 2.298604  | 0.392358  | -2.990056 |
| 68 | 1 | 0 | 1.647427  | 0.690838  | -0.703246 |
| 69 | 5 | 0 | 1.490373  | -2.309412 | -2.702693 |
| 70 | 1 | 0 | 0.836654  | -1.716424 | -0.406676 |
| 71 | 5 | 0 | 0.684669  | -1.648105 | -4.130668 |

|     |    |   |           |           |           |
|-----|----|---|-----------|-----------|-----------|
| 72  | 1  | 0 | -1.031063 | -2.576270 | -2.356745 |
| 73  | 5  | 0 | 1.178836  | 0.032365  | -4.301509 |
| 74  | 1  | 0 | -1.419485 | -0.103244 | -4.124443 |
| 75  | 1  | 0 | 0.347328  | 2.048299  | -2.795178 |
| 76  | 5  | 0 | 2.353882  | -1.188891 | -3.756754 |
| 77  | 1  | 0 | 3.155201  | 1.209578  | -2.943500 |
| 78  | 1  | 0 | 1.763998  | -3.439643 | -2.463124 |
| 79  | 1  | 0 | 0.404969  | -2.342343 | -5.050191 |
| 80  | 1  | 0 | 1.275945  | 0.571885  | -5.358591 |
| 81  | 1  | 0 | 3.291478  | -1.539177 | -4.393698 |
| 82  | 77 | 0 | -1.657940 | 0.462088  | -0.297697 |
| 83  | 6  | 0 | -2.778001 | 1.547811  | -1.910039 |
| 84  | 6  | 0 | -3.139139 | 1.812223  | 0.908060  |
| 85  | 6  | 0 | -3.566694 | 0.487138  | 1.061928  |
| 86  | 6  | 0 | -3.319561 | 0.246558  | -1.768170 |
| 87  | 6  | 0 | -3.513671 | 2.782388  | -1.462875 |
| 88  | 1  | 0 | -2.052859 | 1.696241  | -2.709069 |
| 89  | 6  | 0 | -3.893369 | 2.797837  | 0.025284  |
| 90  | 1  | 0 | -2.566464 | 2.227236  | 1.733642  |
| 91  | 6  | 0 | -4.750216 | -0.088952 | 0.336943  |
| 92  | 1  | 0 | -3.291901 | -0.012410 | 1.977817  |
| 93  | 6  | 0 | -4.716077 | 0.059586  | -1.183304 |
| 94  | 1  | 0 | -2.995902 | -0.511131 | -2.474370 |
| 95  | 1  | 0 | -2.882905 | 3.648533  | -1.679783 |
| 96  | 1  | 0 | -4.416581 | 2.891718  | -2.080039 |
| 97  | 1  | 0 | -3.749259 | 3.800461  | 0.427299  |
| 98  | 1  | 0 | -4.967290 | 2.583281  | 0.141430  |
| 99  | 1  | 0 | -4.808477 | -1.153557 | 0.576589  |
| 100 | 1  | 0 | -5.677168 | 0.361746  | 0.740114  |
| 101 | 1  | 0 | -5.329027 | 0.914002  | -1.495365 |
| 102 | 1  | 0 | -5.168045 | -0.822627 | -1.645190 |
| 103 | 1  | 0 | -0.071254 | 0.885670  | 0.432055  |
| 104 | 6  | 0 | 0.914350  | -1.360414 | -1.427907 |
| 105 | 6  | 0 | 1.375788  | 0.160183  | -1.613492 |
| 106 | 5  | 0 | 0.607387  | 0.897333  | -2.883831 |
| 107 | 5  | 0 | -0.395611 | -0.346592 | -3.571552 |
| 108 | 5  | 0 | 3.854949  | -1.104808 | -1.019099 |
| 109 | 8  | 0 | 4.896283  | -1.991716 | -1.098064 |
| 110 | 8  | 0 | 4.071616  | -0.107975 | -0.083385 |
| 111 | 6  | 0 | 5.813144  | -1.677592 | -0.016322 |
| 112 | 6  | 0 | 5.491209  | -0.180141 | 0.252011  |

|     |   |   |          |           |           |
|-----|---|---|----------|-----------|-----------|
| 113 | 6 | 0 | 7.232514 | -1.943942 | -0.491265 |
| 114 | 1 | 0 | 7.959957 | -1.628696 | 0.274085  |
| 115 | 1 | 0 | 7.375838 | -3.013121 | -0.666264 |
| 116 | 1 | 0 | 7.452923 | -1.418269 | -1.419432 |
| 117 | 6 | 0 | 5.459118 | -2.583586 | 1.147376  |
| 118 | 1 | 0 | 5.493196 | -3.625677 | 0.822068  |
| 119 | 1 | 0 | 6.141484 | -2.458001 | 1.983654  |
| 120 | 1 | 0 | 4.439896 | -2.380296 | 1.502243  |
| 121 | 6 | 0 | 5.673744 | 0.274198  | 1.685429  |
| 122 | 1 | 0 | 6.726477 | 0.219965  | 1.982593  |
| 123 | 1 | 0 | 5.349974 | 1.314598  | 1.796119  |
| 124 | 1 | 0 | 5.097967 | -0.327977 | 2.391797  |
| 125 | 6 | 0 | 6.206971 | 0.763145  | -0.698073 |
| 126 | 1 | 0 | 5.774650 | 1.763884  | -0.615519 |
| 127 | 1 | 0 | 7.274042 | 0.830224  | -0.475605 |
| 128 | 1 | 0 | 6.089346 | 0.436045  | -1.736597 |

---

### Int4u

| Center<br>Number | Atomic<br>Number | Atomic<br>Type | Coordinates (Angstroms) |           |           |
|------------------|------------------|----------------|-------------------------|-----------|-----------|
|                  |                  |                | X                       | Y         | Z         |
| 1                | 5                | 0              | -2.282814               | 1.122045  | 0.282047  |
| 2                | 5                | 0              | 0.232817                | 1.887394  | -0.305900 |
| 3                | 5                | 0              | -2.087452               | -1.747276 | -0.457372 |
| 4                | 8                | 0              | -2.057366               | -2.996601 | -1.055677 |
| 5                | 8                | 0              | -0.447939               | 3.104696  | -0.396451 |
| 6                | 8                | 0              | 1.570262                | 2.133824  | -0.004426 |
| 7                | 8                | 0              | -2.313606               | 1.592873  | 1.581939  |
| 8                | 8                | 0              | -3.442643               | 1.418873  | -0.397646 |
| 9                | 8                | 0              | -3.154275               | -1.640502 | 0.421251  |
| 10               | 6                | 0              | 1.803159                | 3.560228  | 0.059845  |
| 11               | 6                | 0              | 0.358675                | 4.131798  | 0.226927  |
| 12               | 6                | 0              | -3.266770               | -3.706473 | -0.694304 |
| 13               | 6                | 0              | -3.753563               | -2.954082 | 0.584882  |
| 14               | 6                | 0              | -4.220748               | 2.308501  | 0.442307  |
| 15               | 6                | 0              | -3.682197               | 1.979436  | 1.873619  |
| 16               | 6                | 0              | -3.899816               | 3.726549  | -0.000979 |
| 17               | 1                | 0              | -4.134822               | 3.829874  | -1.066878 |
| 18               | 1                | 0              | -4.484962               | 4.473173  | 0.555496  |

|    |   |   |           |           |           |
|----|---|---|-----------|-----------|-----------|
| 19 | 1 | 0 | -2.836851 | 3.933506  | 0.135742  |
| 20 | 6 | 0 | -3.670465 | 3.139792  | 2.835043  |
| 21 | 1 | 0 | -4.695125 | 3.477608  | 3.051344  |
| 22 | 1 | 0 | -3.204818 | 2.832729  | 3.778077  |
| 23 | 1 | 0 | -3.114968 | 3.992304  | 2.450315  |
| 24 | 6 | 0 | -4.354784 | 0.767630  | 2.496964  |
| 25 | 1 | 0 | -3.808552 | 0.486068  | 3.404623  |
| 26 | 1 | 0 | -5.393516 | 0.977858  | 2.773439  |
| 27 | 1 | 0 | -4.337743 | -0.090405 | 1.809802  |
| 28 | 6 | 0 | -5.687364 | 1.984485  | 0.237465  |
| 29 | 1 | 0 | -6.318725 | 2.573306  | 0.928782  |
| 30 | 1 | 0 | -5.986654 | 2.242414  | -0.786278 |
| 31 | 1 | 0 | -5.892402 | 0.926907  | 0.392242  |
| 32 | 6 | 0 | -5.260145 | -2.774508 | 0.683437  |
| 33 | 1 | 0 | -5.774443 | -3.746284 | 0.701819  |
| 34 | 1 | 0 | -5.520988 | -2.253316 | 1.606667  |
| 35 | 1 | 0 | -5.654737 | -2.194927 | -0.153983 |
| 36 | 6 | 0 | -3.225470 | -3.551189 | 1.883971  |
| 37 | 1 | 0 | -3.455527 | -2.868909 | 2.709701  |
| 38 | 1 | 0 | -3.684973 | -4.515863 | 2.094128  |
| 39 | 1 | 0 | -2.140233 | -3.677495 | 1.854490  |
| 40 | 6 | 0 | -4.227074 | -3.548546 | -1.873793 |
| 41 | 1 | 0 | -3.747527 | -3.940812 | -2.779414 |
| 42 | 1 | 0 | -5.157986 | -4.093841 | -1.713999 |
| 43 | 1 | 0 | -4.470100 | -2.496294 | -2.040365 |
| 44 | 6 | 0 | -2.927569 | -5.166087 | -0.482687 |
| 45 | 1 | 0 | -3.802492 | -5.725404 | -0.149270 |
| 46 | 1 | 0 | -2.576207 | -5.608112 | -1.423931 |
| 47 | 1 | 0 | -2.133312 | -5.282661 | 0.255935  |
| 48 | 6 | 0 | -0.081326 | 4.228526  | 1.681597  |
| 49 | 1 | 0 | 0.480992  | 4.998588  | 2.217154  |
| 50 | 1 | 0 | -1.136405 | 4.483717  | 1.710375  |
| 51 | 1 | 0 | 0.042910  | 3.275880  | 2.194226  |
| 52 | 6 | 0 | 0.115089  | 5.445612  | -0.488889 |
| 53 | 1 | 0 | -0.919232 | 5.762838  | -0.340803 |
| 54 | 1 | 0 | 0.768006  | 6.233229  | -0.101645 |
| 55 | 1 | 0 | 0.277217  | 5.356596  | -1.571240 |
| 56 | 6 | 0 | 2.464611  | 3.970206  | -1.246644 |
| 57 | 1 | 0 | 2.736204  | 5.024493  | -1.252808 |
| 58 | 1 | 0 | 3.368227  | 3.380345  | -1.400475 |
| 59 | 1 | 0 | 1.797777  | 3.789773  | -2.096687 |

|     |    |   |           |           |           |
|-----|----|---|-----------|-----------|-----------|
| 60  | 6  | 0 | 2.737443  | 3.829446  | 1.224001  |
| 61  | 1  | 0 | 3.719561  | 3.394836  | 1.036426  |
| 62  | 1  | 0 | 2.875159  | 4.910463  | 1.376915  |
| 63  | 1  | 0 | 2.345067  | 3.392992  | 2.155673  |
| 64  | 5  | 0 | 0.335943  | -0.877470 | 1.005191  |
| 65  | 5  | 0 | 0.761393  | -0.013541 | 2.508377  |
| 66  | 5  | 0 | -0.218362 | -1.465354 | 2.613857  |
| 67  | 5  | 0 | 0.427771  | -2.620463 | 1.458375  |
| 68  | 6  | 0 | 1.737905  | -1.857991 | 0.799499  |
| 69  | 6  | 0 | 1.924841  | -0.384058 | 1.384498  |
| 70  | 5  | 0 | 1.041868  | -1.160519 | 3.822333  |
| 71  | 5  | 0 | 2.411525  | -0.418628 | 2.996560  |
| 72  | 1  | 0 | 0.381798  | 1.104811  | 2.582644  |
| 73  | 5  | 0 | 0.830216  | -2.784022 | 3.168885  |
| 74  | 1  | 0 | -1.381971 | -1.418795 | 2.855935  |
| 75  | 5  | 0 | 2.061108  | -3.035043 | 1.939649  |
| 76  | 1  | 0 | -0.171228 | -3.369259 | 0.768310  |
| 77  | 5  | 0 | 3.061833  | -1.585518 | 1.838755  |
| 78  | 1  | 0 | 2.052256  | -1.998805 | -0.233076 |
| 79  | 1  | 0 | 2.312756  | 0.372145  | 0.703557  |
| 80  | 5  | 0 | 2.460112  | -2.139392 | 3.407369  |
| 81  | 1  | 0 | 0.771944  | -0.874849 | 4.940889  |
| 82  | 1  | 0 | 3.137753  | 0.433514  | 3.369583  |
| 83  | 1  | 0 | 0.409475  | -3.697922 | 3.806721  |
| 84  | 1  | 0 | 2.534594  | -4.052141 | 1.560658  |
| 85  | 1  | 0 | 3.222700  | -2.557558 | 4.203329  |
| 86  | 77 | 0 | -0.747092 | -0.042648 | -0.674420 |
| 87  | 6  | 0 | 1.095020  | -0.280623 | -1.959788 |
| 88  | 6  | 0 | -1.268594 | 1.156000  | -2.559403 |
| 89  | 6  | 0 | -2.087642 | 0.003102  | -2.564199 |
| 90  | 6  | 0 | 0.298533  | -1.427571 | -2.128395 |
| 91  | 6  | 0 | 1.221244  | 0.799071  | -3.017132 |
| 92  | 1  | 0 | 1.964810  | -0.332478 | -1.298512 |
| 93  | 6  | 0 | -0.116373 | 1.316956  | -3.527119 |
| 94  | 1  | 0 | -1.727569 | 2.062791  | -2.184154 |
| 95  | 6  | 0 | -1.845441 | -1.163127 | -3.498000 |
| 96  | 1  | 0 | -3.101429 | 0.123483  | -2.196899 |
| 97  | 6  | 0 | -0.425247 | -1.713026 | -3.434101 |
| 98  | 1  | 0 | 0.544202  | -2.313761 | -1.547877 |
| 99  | 1  | 0 | 1.792540  | 1.625234  | -2.570700 |
| 100 | 1  | 0 | 1.848169  | 0.426339  | -3.848337 |

|     |   |   |           |           |           |
|-----|---|---|-----------|-----------|-----------|
| 101 | 1 | 0 | -0.026100 | 2.380310  | -3.772353 |
| 102 | 1 | 0 | -0.387716 | 0.823493  | -4.470003 |
| 103 | 1 | 0 | -2.556492 | -1.952070 | -3.237717 |
| 104 | 1 | 0 | -2.094180 | -0.839058 | -4.522845 |
| 105 | 1 | 0 | 0.174629  | -1.311991 | -4.263867 |
| 106 | 1 | 0 | -0.455021 | -2.795709 | -3.579165 |
| 107 | 1 | 0 | -1.429489 | -0.252631 | 0.914849  |
| 108 | 5 | 0 | 4.476945  | -1.354357 | 0.976460  |
| 109 | 8 | 0 | 5.737683  | -1.083235 | 1.428530  |
| 110 | 8 | 0 | 4.352187  | -1.229494 | -0.397202 |
| 111 | 6 | 0 | 6.587739  | -0.922532 | 0.245018  |
| 112 | 6 | 0 | 5.548199  | -0.539596 | -0.850367 |
| 113 | 6 | 0 | 7.241927  | -2.267257 | -0.006121 |
| 114 | 1 | 0 | 7.960710  | -2.213334 | -0.829401 |
| 115 | 1 | 0 | 7.774934  | -2.579852 | 0.894683  |
| 116 | 1 | 0 | 6.501337  | -3.035928 | -0.244648 |
| 117 | 6 | 0 | 7.621975  | 0.141977  | 0.544813  |
| 118 | 1 | 0 | 8.293003  | -0.199986 | 1.336532  |
| 119 | 1 | 0 | 8.228332  | 0.352624  | -0.342677 |
| 120 | 1 | 0 | 7.158349  | 1.072821  | 0.876596  |
| 121 | 6 | 0 | 5.198353  | 0.942977  | -0.854136 |
| 122 | 1 | 0 | 6.014773  | 1.558413  | -1.244498 |
| 123 | 1 | 0 | 4.315929  | 1.099436  | -1.472784 |
| 124 | 1 | 0 | 4.965098  | 1.290409  | 0.156200  |
| 125 | 6 | 0 | 5.888909  | -1.005945 | -2.245960 |
| 126 | 1 | 0 | 5.084822  | -0.717484 | -2.940812 |
| 127 | 1 | 0 | 6.812637  | -0.552670 | -2.604809 |
| 128 | 1 | 0 | 5.994800  | -2.091621 | -2.297305 |

## Int5

| Center<br>Number | Atomic<br>Number | Atomic<br>Type | Coordinates (Angstroms) |          |           |
|------------------|------------------|----------------|-------------------------|----------|-----------|
|                  |                  |                | X                       | Y        | Z         |
| 1                | 5                | 0              | -0.517412               | 0.851473 | -1.170883 |
| 2                | 5                | 0              | -2.112701               | 0.603133 | 0.983858  |
| 3                | 8                | 0              | -2.039012               | 0.210697 | 2.308864  |
| 4                | 8                | 0              | -0.216991               | 1.096246 | -2.520339 |
| 5                | 8                | 0              | 0.217698                | 1.715375 | -0.361684 |
| 6                | 8                | 0              | -2.412586               | 1.961809 | 0.891799  |

|    |   |   |           |           |           |
|----|---|---|-----------|-----------|-----------|
| 7  | 6 | 0 | -1.847754 | 1.414961  | 3.092723  |
| 8  | 6 | 0 | -2.603286 | 2.470971  | 2.235342  |
| 9  | 6 | 0 | 0.748879  | 2.766308  | -1.202521 |
| 10 | 6 | 0 | 0.891016  | 2.037130  | -2.567223 |
| 11 | 6 | 0 | -0.289528 | 3.879121  | -1.246081 |
| 12 | 1 | 0 | -0.512364 | 4.209057  | -0.229054 |
| 13 | 1 | 0 | 0.065863  | 4.741012  | -1.819975 |
| 14 | 1 | 0 | -1.224922 | 3.524613  | -1.690066 |
| 15 | 6 | 0 | 0.727979  | 2.929459  | -3.781635 |
| 16 | 1 | 0 | 1.447171  | 3.755620  | -3.753459 |
| 17 | 1 | 0 | 0.914888  | 2.364768  | -4.700530 |
| 18 | 1 | 0 | -0.278409 | 3.349137  | -3.840767 |
| 19 | 6 | 0 | 2.179946  | 1.236004  | -2.665602 |
| 20 | 1 | 0 | 2.085823  | 0.488223  | -3.457139 |
| 21 | 1 | 0 | 3.032290  | 1.883547  | -2.894118 |
| 22 | 1 | 0 | 2.406345  | 0.716656  | -1.727844 |
| 23 | 6 | 0 | 2.048031  | 3.256312  | -0.594666 |
| 24 | 1 | 0 | 2.555353  | 3.960654  | -1.264807 |
| 25 | 1 | 0 | 1.844228  | 3.780128  | 0.344744  |
| 26 | 1 | 0 | 2.723797  | 2.425896  | -0.373038 |
| 27 | 6 | 0 | -4.097050 | 2.495646  | 2.526647  |
| 28 | 1 | 0 | -4.310611 | 2.972463  | 3.488495  |
| 29 | 1 | 0 | -4.614043 | 3.060002  | 1.744949  |
| 30 | 1 | 0 | -4.510981 | 1.482530  | 2.553720  |
| 31 | 6 | 0 | -2.032592 | 3.873514  | 2.301143  |
| 32 | 1 | 0 | -2.601774 | 4.542227  | 1.648398  |
| 33 | 1 | 0 | -2.087871 | 4.270625  | 3.320616  |
| 34 | 1 | 0 | -0.989042 | 3.893237  | 1.979419  |
| 35 | 6 | 0 | -2.404863 | 1.182767  | 4.481321  |
| 36 | 1 | 0 | -1.822129 | 0.409371  | 4.988727  |
| 37 | 1 | 0 | -2.346286 | 2.096926  | 5.082397  |
| 38 | 1 | 0 | -3.445582 | 0.853806  | 4.452834  |
| 39 | 6 | 0 | -0.349590 | 1.690140  | 3.153073  |
| 40 | 1 | 0 | -0.130220 | 2.566647  | 3.771341  |
| 41 | 1 | 0 | 0.165549  | 0.829653  | 3.587383  |
| 42 | 1 | 0 | 0.052746  | 1.862176  | 2.148367  |
| 43 | 5 | 0 | -0.261105 | -1.657068 | 0.341802  |
| 44 | 5 | 0 | 0.312467  | -1.823211 | 2.034153  |
| 45 | 5 | 0 | 2.685552  | -1.780567 | 0.434122  |
| 46 | 5 | 0 | 2.123102  | -3.221826 | -0.401988 |
| 47 | 1 | 0 | 1.310678  | -1.167506 | -1.393006 |

|    |    |   |           |           |           |
|----|----|---|-----------|-----------|-----------|
| 48 | 5  | 0 | 2.072532  | -1.860822 | 2.085293  |
| 49 | 1  | 0 | 1.284633  | 0.078613  | 0.857366  |
| 50 | 5  | 0 | 1.157876  | -3.355202 | 2.271546  |
| 51 | 1  | 0 | -0.246372 | -1.222517 | 2.874411  |
| 52 | 5  | 0 | 1.182722  | -4.196591 | 0.729594  |
| 53 | 1  | 0 | -1.286805 | -3.763209 | 1.454670  |
| 54 | 1  | 0 | -0.186431 | -3.545086 | -1.422121 |
| 55 | 5  | 0 | 2.624777  | -3.329032 | 1.280273  |
| 56 | 1  | 0 | 2.713797  | -3.568652 | -1.367761 |
| 57 | 1  | 0 | 2.645119  | -1.236435 | 2.914088  |
| 58 | 1  | 0 | 1.111297  | -3.909478 | 3.318427  |
| 59 | 1  | 0 | 1.145345  | -5.377090 | 0.624652  |
| 60 | 1  | 0 | 3.639386  | -3.855160 | 1.594301  |
| 61 | 77 | 0 | -1.831967 | -0.619745 | -0.640160 |
| 62 | 6  | 0 | -3.145995 | -2.629593 | -0.701857 |
| 63 | 6  | 0 | -3.413644 | -0.200745 | -2.366312 |
| 64 | 6  | 0 | -3.771722 | 0.612740  | -1.313681 |
| 65 | 6  | 0 | -3.696213 | -1.879305 | 0.309668  |
| 66 | 6  | 0 | -3.690877 | -2.757870 | -2.099594 |
| 67 | 1  | 0 | -2.377775 | -3.350151 | -0.429305 |
| 68 | 6  | 0 | -4.177121 | -1.449260 | -2.749113 |
| 69 | 1  | 0 | -2.736726 | 0.211633  | -3.113768 |
| 70 | 6  | 0 | -4.886361 | 0.329221  | -0.347033 |
| 71 | 1  | 0 | -3.378315 | 1.625720  | -1.280325 |
| 72 | 6  | 0 | -4.994842 | -1.120670 | 0.166335  |
| 73 | 1  | 0 | -3.301641 | -2.017535 | 1.314480  |
| 74 | 1  | 0 | -2.908205 | -3.195386 | -2.728563 |
| 75 | 1  | 0 | -4.513171 | -3.489411 | -2.106789 |
| 76 | 1  | 0 | -4.118587 | -1.566981 | -3.835085 |
| 77 | 1  | 0 | -5.236743 | -1.290119 | -2.516808 |
| 78 | 1  | 0 | -4.750952 | 1.002778  | 0.501956  |
| 79 | 1  | 0 | -5.846559 | 0.619847  | -0.800430 |
| 80 | 1  | 0 | -5.658285 | -1.697832 | -0.488511 |
| 81 | 1  | 0 | -5.494313 | -1.098683 | 1.141092  |
| 82 | 6  | 0 | 1.237454  | -1.007097 | 0.906865  |
| 83 | 6  | 0 | 1.270049  | -1.773371 | -0.492177 |
| 84 | 5  | 0 | 0.361923  | -3.168986 | -0.441208 |
| 85 | 5  | 0 | -0.246917 | -3.249122 | 1.197021  |
| 86 | 5  | 0 | 4.061543  | -0.869088 | 0.155678  |
| 87 | 8  | 0 | 5.296073  | -1.421745 | -0.078519 |
| 88 | 8  | 0 | 4.116481  | 0.501670  | 0.313614  |



|     |   |   |          |           |           |
|-----|---|---|----------|-----------|-----------|
| 89  | 6 | 0 | 6.281917 | -0.403805 | 0.236529  |
| 90  | 6 | 0 | 5.481654 | 0.917853  | 0.023726  |
| 91  | 6 | 0 | 7.475527 | -0.581852 | -0.678647 |
| 92  | 1 | 0 | 8.211735 | 0.212955  | -0.516745 |
| 93  | 1 | 0 | 7.962786 | -1.537939 | -0.472142 |
| 94  | 1 | 0 | 7.183221 | -0.573985 | -1.730354 |
| 95  | 6 | 0 | 6.680264 | -0.628182 | 1.688707  |
| 96  | 1 | 0 | 7.042032 | -1.652152 | 1.806926  |
| 97  | 1 | 0 | 7.473187 | 0.057360  | 2.003075  |
| 98  | 1 | 0 | 5.823990 | -0.497523 | 2.357504  |
| 99  | 6 | 0 | 5.847403 | 2.046061  | 0.966482  |
| 100 | 1 | 0 | 6.896063 | 2.335009  | 0.837258  |
| 101 | 1 | 0 | 5.229663 | 2.924258  | 0.757058  |
| 102 | 1 | 0 | 5.691900 | 1.766278  | 2.009731  |
| 103 | 6 | 0 | 5.510121 | 1.400588  | -1.417943 |
| 104 | 1 | 0 | 4.803809 | 2.226900  | -1.537652 |
| 105 | 1 | 0 | 6.504363 | 1.760210  | -1.699890 |
| 106 | 1 | 0 | 5.221578 | 0.602537  | -2.109073 |

---

## Int5u

| Center<br>Number | Atomic<br>Number | Atomic<br>Type | Coordinates (Angstroms) |           |           |
|------------------|------------------|----------------|-------------------------|-----------|-----------|
|                  |                  |                | X                       | Y         | Z         |
| 1                | 5                | 0              | 2.137980                | -0.306143 | -1.380704 |
| 2                | 5                | 0              | 1.781642                | 0.385721  | 1.179468  |
| 3                | 8                | 0              | 1.585597                | 0.968275  | 2.424944  |
| 4                | 8                | 0              | 2.095992                | -1.594508 | -1.887899 |
| 5                | 8                | 0              | 3.362957                | 0.296650  | -1.669210 |
| 6                | 8                | 0              | 2.887698                | -0.443265 | 1.187135  |
| 7                | 6                | 0              | 2.707278                | 0.628011  | 3.279406  |
| 8                | 6                | 0              | 3.384111                | -0.580477 | 2.537499  |
| 9                | 6                | 0              | 4.087561                | -0.579646 | -2.561494 |
| 10               | 6                | 0              | 3.448873                | -1.964369 | -2.251266 |
| 11               | 6                | 0              | 3.799877                | -0.100273 | -3.979290 |
| 12               | 1                | 0              | 4.097014                | 0.948387  | -4.071386 |
| 13               | 1                | 0              | 4.351420                | -0.678486 | -4.728312 |
| 14               | 1                | 0              | 2.728650                | -0.166069 | -4.200200 |
| 15               | 6                | 0              | 3.403596                | -2.928229 | -3.419124 |
| 16               | 1                | 0              | 4.416552                | -3.216579 | -3.721319 |

|    |   |   |           |           |           |
|----|---|---|-----------|-----------|-----------|
| 17 | 1 | 0 | 2.867978  | -3.836228 | -3.127679 |
| 18 | 1 | 0 | 2.896778  | -2.502503 | -4.286228 |
| 19 | 6 | 0 | 4.068522  | -2.644916 | -1.037833 |
| 20 | 1 | 0 | 3.450428  | -3.501592 | -0.755351 |
| 21 | 1 | 0 | 5.081479  | -3.002882 | -1.250238 |
| 22 | 1 | 0 | 4.096932  | -1.959355 | -0.187731 |
| 23 | 6 | 0 | 5.566185  | -0.478095 | -2.246149 |
| 24 | 1 | 0 | 6.143561  | -1.200535 | -2.833929 |
| 25 | 1 | 0 | 5.935959  | 0.522439  | -2.487957 |
| 26 | 1 | 0 | 5.757029  | -0.662152 | -1.186442 |
| 27 | 6 | 0 | 4.901839  | -0.518436 | 2.485830  |
| 28 | 1 | 0 | 5.330570  | -0.528096 | 3.493880  |
| 29 | 1 | 0 | 5.287446  | -1.392858 | 1.953581  |
| 30 | 1 | 0 | 5.257091  | 0.372915  | 1.964391  |
| 31 | 6 | 0 | 2.954165  | -1.947262 | 3.050196  |
| 32 | 1 | 0 | 3.337307  | -2.717311 | 2.374885  |
| 33 | 1 | 0 | 3.352342  | -2.140265 | 4.051570  |
| 34 | 1 | 0 | 1.868186  | -2.051562 | 3.081946  |
| 35 | 6 | 0 | 3.599546  | 1.860071  | 3.348450  |
| 36 | 1 | 0 | 3.015543  | 2.709331  | 3.716100  |
| 37 | 1 | 0 | 4.446243  | 1.711320  | 4.025727  |
| 38 | 1 | 0 | 3.996592  | 2.120107  | 2.362223  |
| 39 | 6 | 0 | 2.170248  | 0.298541  | 4.658731  |
| 40 | 1 | 0 | 2.978280  | -0.018070 | 5.327145  |
| 41 | 1 | 0 | 1.699503  | 1.183107  | 5.096647  |
| 42 | 1 | 0 | 1.423417  | -0.496941 | 4.618550  |
| 43 | 5 | 0 | -0.306707 | -1.017862 | 0.199377  |
| 44 | 5 | 0 | -0.726180 | -2.404105 | -0.858390 |
| 45 | 5 | 0 | 0.182400  | -2.690784 | 0.614521  |
| 46 | 5 | 0 | -0.529088 | -1.673415 | 1.859016  |
| 47 | 6 | 0 | -1.802456 | -0.924966 | 1.119605  |
| 48 | 6 | 0 | -1.908587 | -1.329172 | -0.403940 |
| 49 | 5 | 0 | -1.068864 | -3.845138 | 0.104387  |
| 50 | 5 | 0 | -2.395360 | -2.922901 | -0.597755 |
| 51 | 1 | 0 | -0.335990 | -2.371317 | -1.972937 |
| 52 | 5 | 0 | -0.939661 | -3.390954 | 1.799550  |
| 53 | 1 | 0 | 1.336991  | -2.955201 | 0.608515  |
| 54 | 5 | 0 | -2.194526 | -2.200618 | 2.139055  |
| 55 | 1 | 0 | 0.003655  | -1.103383 | 2.747085  |
| 56 | 5 | 0 | -3.109413 | -1.919652 | 0.665478  |
| 57 | 1 | 0 | -2.106013 | 0.085173  | 1.371985  |

|    |    |   |           |           |           |
|----|----|---|-----------|-----------|-----------|
| 58 | 1  | 0 | -2.292644 | -0.569752 | -1.076346 |
| 59 | 5  | 0 | -2.541953 | -3.540616 | 1.047478  |
| 60 | 1  | 0 | -0.797198 | -4.925974 | -0.300364 |
| 61 | 1  | 0 | -3.069319 | -3.176984 | -1.539389 |
| 62 | 1  | 0 | -0.565410 | -4.132212 | 2.646770  |
| 63 | 1  | 0 | -2.707984 | -1.946271 | 3.174105  |
| 64 | 1  | 0 | -3.322706 | -4.385722 | 1.329699  |
| 65 | 77 | 0 | 0.623583  | 0.758114  | -0.475302 |
| 66 | 6  | 0 | -1.372857 | 2.205097  | -0.169418 |
| 67 | 6  | 0 | 1.143561  | 2.670804  | -1.674699 |
| 68 | 6  | 0 | 1.938314  | 2.684080  | -0.534975 |
| 69 | 6  | 0 | -0.602028 | 2.404700  | 0.943989  |
| 70 | 6  | 0 | -1.406394 | 3.128919  | -1.360103 |
| 71 | 1  | 0 | -2.166199 | 1.457374  | -0.140204 |
| 72 | 6  | 0 | -0.032621 | 3.609520  | -1.875183 |
| 73 | 1  | 0 | 1.584077  | 2.238867  | -2.572743 |
| 74 | 6  | 0 | 1.694272  | 3.554760  | 0.665054  |
| 75 | 1  | 0 | 2.937329  | 2.262311  | -0.623667 |
| 76 | 6  | 0 | 0.237294  | 3.638900  | 1.152557  |
| 77 | 1  | 0 | -0.736493 | 1.754993  | 1.806272  |
| 78 | 1  | 0 | -1.936383 | 2.614222  | -2.171074 |
| 79 | 1  | 0 | -2.027413 | 4.007017  | -1.124288 |
| 80 | 1  | 0 | -0.125977 | 3.821384  | -2.945967 |
| 81 | 1  | 0 | 0.212853  | 4.572652  | -1.410530 |
| 82 | 1  | 0 | 2.311368  | 3.183796  | 1.484213  |
| 83 | 1  | 0 | 2.060330  | 4.570484  | 0.448411  |
| 84 | 1  | 0 | -0.270272 | 4.484604  | 0.672845  |
| 85 | 1  | 0 | 0.250491  | 3.867227  | 2.223512  |
| 86 | 5  | 0 | -4.522107 | -1.066616 | 0.390389  |
| 87 | 8  | 0 | -5.789064 | -1.516287 | 0.140081  |
| 88 | 8  | 0 | -4.395946 | 0.300473  | 0.183257  |
| 89 | 6  | 0 | -6.620634 | -0.347078 | -0.111389 |
| 90 | 6  | 0 | -5.571457 | 0.712159  | -0.562571 |
| 91 | 6  | 0 | -7.292777 | 0.012079  | 1.204621  |
| 92 | 1  | 0 | -8.000283 | 0.838056  | 1.082924  |
| 93 | 1  | 0 | -7.840043 | -0.856183 | 1.578649  |
| 94 | 1  | 0 | -6.555102 | 0.297915  | 1.959816  |
| 95 | 6  | 0 | -7.649839 | -0.707845 | -1.161872 |
| 96 | 1  | 0 | -8.337766 | -1.460785 | -0.769478 |
| 97 | 1  | 0 | -8.238772 | 0.171350  | -1.444858 |
| 98 | 1  | 0 | -7.182377 | -1.116260 | -2.059723 |

|     |   |   |           |           |           |
|-----|---|---|-----------|-----------|-----------|
| 99  | 6 | 0 | -5.199846 | 0.589012  | -2.035297 |
| 100 | 1 | 0 | -6.002574 | 0.939534  | -2.691826 |
| 101 | 1 | 0 | -4.305104 | 1.187917  | -2.234777 |
| 102 | 1 | 0 | -4.964668 | -0.449390 | -2.295998 |
| 103 | 6 | 0 | -5.900107 | 2.145540  | -0.205419 |
| 104 | 1 | 0 | -5.089880 | 2.804788  | -0.531659 |
| 105 | 1 | 0 | -6.819848 | 2.470920  | -0.703104 |
| 106 | 1 | 0 | -6.025415 | 2.274045  | 0.871191  |

---

## Int6

| Center<br>Number | Atomic<br>Number | Atomic<br>Type | Coordinates (Angstroms) |           |           |
|------------------|------------------|----------------|-------------------------|-----------|-----------|
|                  |                  |                | X                       | Y         | Z         |
| 1                | 5                | 0              | -3.066054               | 0.125521  | 0.312180  |
| 2                | 8                | 0              | -3.643409               | 1.375556  | 0.472056  |
| 3                | 8                | 0              | -3.296443               | -0.685969 | 1.410451  |
| 4                | 6                | 0              | -4.243540               | 1.460841  | 1.781249  |
| 5                | 6                | 0              | -4.275340               | -0.051326 | 2.254736  |
| 6                | 6                | 0              | -5.603089               | -0.742200 | 1.964024  |
| 7                | 1                | 0              | -5.504836               | -1.808316 | 2.190838  |
| 8                | 1                | 0              | -6.425398               | -0.335947 | 2.580362  |
| 9                | 1                | 0              | -5.887898               | -0.641551 | 0.913726  |
| 10               | 6                | 0              | -3.865302               | -0.267389 | 3.692908  |
| 11               | 1                | 0              | -4.541855               | 0.252679  | 4.389165  |
| 12               | 1                | 0              | -3.885692               | -1.334843 | 3.933161  |
| 13               | 1                | 0              | -2.853817               | 0.095707  | 3.854428  |
| 14               | 6                | 0              | -5.620444               | 2.093552  | 1.615898  |
| 15               | 1                | 0              | -6.148665               | 2.150602  | 2.572960  |
| 16               | 1                | 0              | -5.497008               | 3.119374  | 1.240496  |
| 17               | 1                | 0              | -6.242235               | 1.544073  | 0.904494  |
| 18               | 6                | 0              | -3.373012               | 2.349077  | 2.645136  |
| 19               | 1                | 0              | -3.288011               | 3.334738  | 2.178424  |
| 20               | 1                | 0              | -3.794359               | 2.473518  | 3.644430  |
| 21               | 1                | 0              | -2.362585               | 1.940418  | 2.724728  |
| 22               | 5                | 0              | -1.221409               | -1.992237 | 0.007873  |
| 23               | 8                | 0              | -0.413012               | -2.274516 | 1.095457  |
| 24               | 8                | 0              | -2.010562               | -3.080979 | -0.313705 |
| 25               | 6                | 0              | -1.898219               | -4.087834 | 0.708404  |
| 26               | 6                | 0              | -0.599776               | -3.667206 | 1.485272  |

|    |    |   |           |           |           |
|----|----|---|-----------|-----------|-----------|
| 27 | 6  | 0 | -1.814467 | -5.446259 | 0.029781  |
| 28 | 1  | 0 | -1.662997 | -6.237687 | 0.772049  |
| 29 | 1  | 0 | -2.745168 | -5.657064 | -0.499464 |
| 30 | 1  | 0 | -0.996942 | -5.487075 | -0.691776 |
| 31 | 6  | 0 | -3.165987 | -4.003852 | 1.548057  |
| 32 | 1  | 0 | -4.030986 | -4.154932 | 0.887878  |
| 33 | 1  | 0 | -3.200043 | -4.769267 | 2.329341  |
| 34 | 1  | 0 | -3.264299 | -3.021031 | 2.000232  |
| 35 | 6  | 0 | -0.743446 | -3.735286 | 2.995915  |
| 36 | 1  | 0 | -1.018250 | -4.749210 | 3.314989  |
| 37 | 1  | 0 | 0.209481  | -3.482433 | 3.472029  |
| 38 | 1  | 0 | -1.501960 | -3.039355 | 3.353503  |
| 39 | 6  | 0 | 0.655113  | -4.428947 | 1.061886  |
| 40 | 1  | 0 | 1.528400  | -3.975887 | 1.542638  |
| 41 | 1  | 0 | 0.602313  | -5.480795 | 1.372972  |
| 42 | 1  | 0 | 0.816722  | -4.396991 | -0.016662 |
| 43 | 5  | 0 | 0.553777  | -0.749318 | -1.877341 |
| 44 | 5  | 0 | 1.067628  | -2.475671 | -2.058222 |
| 45 | 5  | 0 | 0.868691  | -1.515969 | -3.493555 |
| 46 | 5  | 0 | 1.505722  | 0.086029  | -3.151341 |
| 47 | 6  | 0 | 2.078899  | -0.020662 | -1.599353 |
| 48 | 6  | 0 | 1.829486  | -1.480482 | -0.971670 |
| 49 | 5  | 0 | 2.217357  | -2.663782 | -3.381263 |
| 50 | 5  | 0 | 2.786571  | -2.645282 | -1.710858 |
| 51 | 1  | 0 | 0.313611  | -3.293159 | -1.668422 |
| 52 | 5  | 0 | 2.488728  | -1.058689 | -4.068915 |
| 53 | 1  | 0 | -0.028992 | -1.707427 | -4.242593 |
| 54 | 5  | 0 | 3.224353  | -0.065822 | -2.824427 |
| 55 | 1  | 0 | 1.106972  | 1.127953  | -3.544991 |
| 56 | 5  | 0 | 3.411300  | -1.042615 | -1.350865 |
| 57 | 1  | 0 | 1.612791  | -1.518485 | 0.086521  |
| 58 | 5  | 0 | 3.677091  | -1.758819 | -2.944716 |
| 59 | 1  | 0 | 2.248324  | -3.656729 | -4.028135 |
| 60 | 1  | 0 | 3.176856  | -3.541975 | -1.042611 |
| 61 | 1  | 0 | 2.724819  | -0.879060 | -5.213889 |
| 62 | 1  | 0 | 3.935962  | 0.883765  | -2.934695 |
| 63 | 1  | 0 | 4.780069  | -2.083023 | -3.268136 |
| 64 | 77 | 0 | -1.404976 | -0.231636 | -1.057131 |
| 65 | 6  | 0 | -2.676395 | 1.822292  | -2.194133 |
| 66 | 6  | 0 | -3.567123 | -0.741867 | -1.365055 |
| 67 | 6  | 0 | -2.603085 | -1.238351 | -2.395226 |

|     |   |   |           |           |           |
|-----|---|---|-----------|-----------|-----------|
| 68  | 6 | 0 | -1.680460 | 1.433339  | -3.033443 |
| 69  | 6 | 0 | -4.132179 | 1.517859  | -2.429625 |
| 70  | 1 | 0 | -2.455275 | 2.508508  | -1.383296 |
| 71  | 6 | 0 | -4.667778 | 0.204584  | -1.834223 |
| 72  | 1 | 0 | -3.945520 | -1.569353 | -0.761386 |
| 73  | 6 | 0 | -2.689505 | -0.757029 | -3.839687 |
| 74  | 1 | 0 | -2.433917 | -2.315433 | -2.325909 |
| 75  | 6 | 0 | -1.900520 | 0.520129  | -4.193011 |
| 76  | 1 | 0 | -0.691116 | 1.866583  | -2.912696 |
| 77  | 1 | 0 | -4.721371 | 2.355653  | -2.032313 |
| 78  | 1 | 0 | -4.298278 | 1.516010  | -3.513116 |
| 79  | 1 | 0 | -5.336568 | 0.431664  | -1.004551 |
| 80  | 1 | 0 | -5.277497 | -0.324975 | -2.577600 |
| 81  | 1 | 0 | -2.324955 | -1.571464 | -4.478809 |
| 82  | 1 | 0 | -3.747356 | -0.637931 | -4.094078 |
| 83  | 1 | 0 | -2.417133 | 1.058632  | -5.001092 |
| 84  | 1 | 0 | -0.923222 | 0.236992  | -4.600451 |
| 85  | 5 | 0 | -0.376549 | 1.955716  | -0.027990 |
| 86  | 5 | 0 | -0.025468 | 0.647536  | 1.092744  |
| 87  | 8 | 0 | 0.449285  | 2.352883  | -1.062507 |
| 88  | 8 | 0 | -0.862668 | 3.033959  | 0.686851  |
| 89  | 8 | 0 | -0.657475 | 0.451823  | 2.293509  |
| 90  | 6 | 0 | -0.346824 | 4.264827  | 0.091878  |
| 91  | 6 | 0 | 0.804569  | 3.746105  | -0.843917 |
| 92  | 8 | 0 | 1.355879  | 0.600140  | 1.219886  |
| 93  | 6 | 0 | 0.344437  | 0.569924  | 3.359880  |
| 94  | 6 | 0 | 1.699290  | 0.312535  | 2.612332  |
| 95  | 6 | 0 | 0.895849  | 4.432385  | -2.199794 |
| 96  | 1 | 0 | 1.134016  | 5.495511  | -2.085331 |
| 97  | 1 | 0 | 1.693990  | 3.961374  | -2.792142 |
| 98  | 1 | 0 | -0.036876 | 4.342718  | -2.762617 |
| 99  | 6 | 0 | 2.176688  | 3.722322  | -0.184794 |
| 100 | 1 | 0 | 2.895221  | 3.214055  | -0.834665 |
| 101 | 1 | 0 | 2.558303  | 4.739306  | 0.015600  |
| 102 | 1 | 0 | 2.143679  | 3.176053  | 0.764450  |
| 103 | 6 | 0 | 0.115493  | 5.167827  | 1.221379  |
| 104 | 1 | 0 | 0.537334  | 6.095972  | 0.835150  |
| 105 | 1 | 0 | -0.736382 | 5.413406  | 1.861764  |
| 106 | 1 | 0 | 0.871331  | 4.677123  | 1.853278  |
| 107 | 6 | 0 | -1.485654 | 4.929446  | -0.658134 |
| 108 | 1 | 0 | -2.339341 | 5.044874  | 0.022657  |

|     |   |   |           |           |           |
|-----|---|---|-----------|-----------|-----------|
| 109 | 1 | 0 | -1.193488 | 5.926524  | -1.012368 |
| 110 | 1 | 0 | -1.815713 | 4.352838  | -1.529619 |
| 111 | 1 | 0 | 2.047925  | 0.808263  | -0.904811 |
| 112 | 6 | 0 | 2.182046  | -1.127536 | 2.666988  |
| 113 | 1 | 0 | 3.029125  | -1.251177 | 1.991062  |
| 114 | 1 | 0 | 2.513576  | -1.403521 | 3.679828  |
| 115 | 1 | 0 | 1.382956  | -1.812280 | 2.351728  |
| 116 | 6 | 0 | 2.830346  | 1.249903  | 3.007060  |
| 117 | 1 | 0 | 3.658345  | 1.093579  | 2.314429  |
| 118 | 1 | 0 | 2.542221  | 2.303432  | 2.943841  |
| 119 | 1 | 0 | 3.169711  | 1.041744  | 4.023326  |
| 120 | 6 | 0 | 0.037988  | -0.431466 | 4.448438  |
| 121 | 1 | 0 | -0.047690 | -1.440105 | 4.045252  |
| 122 | 1 | 0 | 0.815195  | -0.413413 | 5.210229  |
| 123 | 1 | 0 | -0.908975 | -0.182284 | 4.938073  |
| 124 | 6 | 0 | 0.204982  | 1.989929  | 3.898838  |
| 125 | 1 | 0 | 0.339347  | 2.734599  | 3.102267  |
| 126 | 1 | 0 | -0.791151 | 2.133924  | 4.308931  |
| 127 | 1 | 0 | 0.932841  | 2.192242  | 4.689582  |
| 128 | 5 | 0 | 4.623965  | -0.580300 | -0.287118 |
| 129 | 8 | 0 | 5.675981  | -1.396504 | 0.067827  |
| 130 | 8 | 0 | 4.783195  | 0.715193  | 0.161479  |
| 131 | 6 | 0 | 6.565568  | -0.618213 | 0.920321  |
| 132 | 6 | 0 | 6.191671  | 0.847240  | 0.527288  |
| 133 | 6 | 0 | 6.330056  | 1.868859  | 1.642477  |
| 134 | 1 | 0 | 7.386722  | 1.978925  | 1.923121  |
| 135 | 1 | 0 | 5.961599  | 2.832344  | 1.306593  |
| 136 | 1 | 0 | 5.768975  | 1.581738  | 2.535538  |
| 137 | 6 | 0 | 6.914150  | 1.323142  | -0.723803 |
| 138 | 1 | 0 | 6.447710  | 2.253729  | -1.068264 |
| 139 | 1 | 0 | 7.967637  | 1.521425  | -0.540424 |
| 140 | 1 | 0 | 6.829485  | 0.592704  | -1.533173 |
| 141 | 6 | 0 | 6.215297  | -0.960295 | 2.363305  |
| 142 | 1 | 0 | 6.261668  | -2.034172 | 2.490987  |
| 143 | 1 | 0 | 6.905353  | -0.484106 | 3.063630  |
| 144 | 1 | 0 | 5.201994  | -0.631268 | 2.608540  |
| 145 | 6 | 0 | 7.989674  | -1.014126 | 0.608631  |
| 146 | 1 | 0 | 8.693295  | -0.380797 | 1.167742  |
| 147 | 1 | 0 | 8.164896  | -2.045259 | 0.902230  |
| 148 | 1 | 0 | 8.214741  | -0.918450 | -0.458626 |

---

## Int6u

---

| Center<br>Number | Atomic<br>Number | Atomic<br>Type | Coordinates (Angstroms) |           |           |
|------------------|------------------|----------------|-------------------------|-----------|-----------|
|                  |                  |                | X                       | Y         | Z         |
| 1                | 5                | 0              | 2.022017                | -0.637650 | -1.710737 |
| 2                | 8                | 0              | 2.236386                | -2.000069 | -1.883237 |
| 3                | 8                | 0              | 3.223423                | 0.062397  | -1.737096 |
| 4                | 6                | 0              | 3.657426                | -2.267643 | -1.971028 |
| 5                | 6                | 0              | 4.272503                | -0.824618 | -2.173186 |
| 6                | 6                | 0              | 4.550684                | -0.483815 | -3.624131 |
| 7                | 1                | 0              | 4.846419                | 0.563257  | -3.702221 |
| 8                | 1                | 0              | 5.350435                | -1.096811 | -4.048423 |
| 9                | 1                | 0              | 3.659359                | -0.614589 | -4.246647 |
| 10               | 6                | 0              | 5.494460                | -0.541503 | -1.320343 |
| 11               | 1                | 0              | 6.321892                | -1.213928 | -1.583417 |
| 12               | 1                | 0              | 5.830908                | 0.487133  | -1.478114 |
| 13               | 1                | 0              | 5.264858                | -0.659347 | -0.260719 |
| 14               | 6                | 0              | 3.863727                | -3.215570 | -3.134428 |
| 15               | 1                | 0              | 4.926068                | -3.433735 | -3.273776 |
| 16               | 1                | 0              | 3.354093                | -4.155385 | -2.924330 |
| 17               | 1                | 0              | 3.473072                | -2.819188 | -4.074993 |
| 18               | 6                | 0              | 4.092986                | -2.941634 | -0.680829 |
| 19               | 1                | 0              | 3.542517                | -3.877725 | -0.556523 |
| 20               | 1                | 0              | 5.163208                | -3.162630 | -0.691968 |
| 21               | 1                | 0              | 3.863408                | -2.315772 | 0.183209  |
| 22               | 5                | 0              | 1.388209                | 1.904766  | -0.535326 |
| 23               | 8                | 0              | 2.220814                | 2.359244  | 0.472189  |
| 24               | 8                | 0              | 1.390436                | 2.786385  | -1.610735 |
| 25               | 6                | 0              | 2.420572                | 3.772756  | -1.403547 |
| 26               | 6                | 0              | 2.654984                | 3.706260  | 0.138809  |
| 27               | 6                | 0              | 1.927700                | 5.112416  | -1.914806 |
| 28               | 1                | 0              | 2.653651                | 5.903287  | -1.706344 |
| 29               | 1                | 0              | 1.784214                | 5.063864  | -2.997271 |
| 30               | 1                | 0              | 0.967787                | 5.382682  | -1.454752 |
| 31               | 6                | 0              | 3.635158                | 3.312633  | -2.213584 |
| 32               | 1                | 0              | 3.342724                | 3.210018  | -3.263624 |
| 33               | 1                | 0              | 4.452573                | 4.036298  | -2.162203 |
| 34               | 1                | 0              | 3.986016                | 2.342424  | -1.865825 |
| 35               | 6                | 0              | 4.095173                | 3.864878  | 0.556724  |

---



|    |    |   |           |           |           |
|----|----|---|-----------|-----------|-----------|
| 36 | 1  | 0 | 4.491944  | 4.842318  | 0.220379  |
| 37 | 1  | 0 | 4.190262  | 3.836345  | 1.647006  |
| 38 | 1  | 0 | 4.730659  | 3.085200  | 0.132389  |
| 39 | 6  | 0 | 1.777490  | 4.671346  | 0.921668  |
| 40 | 1  | 0 | 1.857944  | 4.452144  | 1.987489  |
| 41 | 1  | 0 | 2.085139  | 5.707251  | 0.759163  |
| 42 | 1  | 0 | 0.723448  | 4.575806  | 0.647180  |
| 43 | 5  | 0 | -1.005846 | 1.145449  | 0.805131  |
| 44 | 5  | 0 | -1.491350 | 2.864820  | 0.589727  |
| 45 | 5  | 0 | -3.229470 | 3.070933  | 0.812747  |
| 46 | 5  | 0 | -2.110853 | 3.540940  | 2.094326  |
| 47 | 1  | 0 | -0.975476 | 3.457623  | -0.312442 |
| 48 | 5  | 0 | -3.910881 | 1.498113  | 1.223175  |
| 49 | 1  | 0 | -2.757929 | 1.373611  | -0.813597 |
| 50 | 5  | 0 | -3.190739 | 0.991373  | 2.754273  |
| 51 | 1  | 0 | -2.695303 | -0.517617 | 0.943531  |
| 52 | 5  | 0 | -2.089337 | 2.254031  | 3.293903  |
| 53 | 1  | 0 | 0.317962  | 2.677917  | 2.415980  |
| 54 | 5  | 0 | -3.613456 | 2.678993  | 2.488642  |
| 55 | 1  | 0 | -3.842554 | 3.752870  | 0.064145  |
| 56 | 1  | 0 | -1.944591 | 4.682365  | 2.360520  |
| 57 | 1  | 0 | -3.780111 | 0.191796  | 3.394207  |
| 58 | 1  | 0 | -1.909022 | 2.450666  | 4.449065  |
| 59 | 1  | 0 | -4.527023 | 3.185367  | 3.056724  |
| 60 | 77 | 0 | 0.270168  | 0.172165  | -0.649574 |
| 61 | 6  | 0 | -0.670322 | -2.199862 | -1.935559 |
| 62 | 6  | 0 | 0.740154  | 0.103756  | -2.862156 |
| 63 | 6  | 0 | -0.481613 | 0.862880  | -2.443520 |
| 64 | 6  | 0 | -1.766635 | -1.558938 | -1.459284 |
| 65 | 6  | 0 | -0.288547 | -2.211579 | -3.377713 |
| 66 | 1  | 0 | -0.091421 | -2.816692 | -1.255128 |
| 67 | 6  | 0 | 0.560739  | -1.023692 | -3.869721 |
| 68 | 1  | 0 | 1.492496  | 0.828478  | -3.198421 |
| 69 | 6  | 0 | -1.861634 | 0.472347  | -2.985647 |
| 70 | 1  | 0 | -0.342000 | 1.938168  | -2.537879 |
| 71 | 6  | 0 | -2.623233 | -0.691184 | -2.316210 |
| 72 | 1  | 0 | -2.043756 | -1.726323 | -0.432119 |
| 73 | 1  | 0 | 0.254546  | -3.138395 | -3.580555 |
| 74 | 1  | 0 | -1.214861 | -2.256126 | -3.976325 |
| 75 | 1  | 0 | 1.545535  | -1.390781 | -4.184407 |
| 76 | 1  | 0 | 0.113856  | -0.588379 | -4.775632 |

|     |   |   |           |           |           |
|-----|---|---|-----------|-----------|-----------|
| 77  | 1 | 0 | -2.499690 | 1.364655  | -2.958788 |
| 78  | 1 | 0 | -1.738517 | 0.266694  | -4.066336 |
| 79  | 1 | 0 | -3.107105 | -1.305725 | -3.103453 |
| 80  | 1 | 0 | -3.461284 | -0.296964 | -1.723225 |
| 81  | 5 | 0 | 0.703144  | -1.678456 | 0.957802  |
| 82  | 5 | 0 | 1.765571  | -0.346370 | 1.471000  |
| 83  | 8 | 0 | -0.610044 | -1.969646 | 1.273511  |
| 84  | 8 | 0 | 1.500549  | -2.805459 | 1.054403  |
| 85  | 8 | 0 | 3.107676  | -0.328380 | 1.206444  |
| 86  | 6 | 0 | 0.704131  | -3.938898 | 1.504813  |
| 87  | 6 | 0 | -0.691353 | -3.299920 | 1.843742  |
| 88  | 8 | 0 | 1.466292  | -0.059791 | 2.780918  |
| 89  | 6 | 0 | 3.808549  | -0.223728 | 2.485837  |
| 90  | 6 | 0 | 2.700653  | 0.281237  | 3.475169  |
| 91  | 6 | 0 | -1.881877 | -4.005769 | 1.205057  |
| 92  | 1 | 0 | -1.983840 | -5.020052 | 1.600812  |
| 93  | 1 | 0 | -2.802848 | -3.466647 | 1.443853  |
| 94  | 1 | 0 | -1.787568 | -4.070280 | 0.119602  |
| 95  | 6 | 0 | -0.941430 | -3.093015 | 3.325681  |
| 96  | 1 | 0 | -1.884643 | -2.550514 | 3.459660  |
| 97  | 1 | 0 | -1.010896 | -4.045521 | 3.866916  |
| 98  | 1 | 0 | -0.150344 | -2.476320 | 3.778889  |
| 99  | 6 | 0 | 1.421627  | -4.559531 | 2.700766  |
| 100 | 1 | 0 | 0.867732  | -5.430223 | 3.091890  |
| 101 | 1 | 0 | 2.417058  | -4.909240 | 2.395056  |
| 102 | 1 | 0 | 1.558513  | -3.845996 | 3.514137  |
| 103 | 6 | 0 | 0.681992  | -4.956753 | 0.355376  |
| 104 | 1 | 0 | 1.712875  | -5.277611 | 0.146942  |
| 105 | 1 | 0 | 0.099127  | -5.847177 | 0.629352  |
| 106 | 1 | 0 | 0.270886  | -4.535653 | -0.574020 |
| 107 | 1 | 0 | -0.942474 | -0.103523 | 3.057477  |
| 108 | 6 | 0 | 2.695176  | 1.790357  | 3.682278  |
| 109 | 1 | 0 | 1.813108  | 2.063934  | 4.263194  |
| 110 | 1 | 0 | 3.583442  | 2.121702  | 4.224227  |
| 111 | 1 | 0 | 2.638606  | 2.309969  | 2.721805  |
| 112 | 6 | 0 | 2.679230  | -0.432864 | 4.818594  |
| 113 | 1 | 0 | 1.844688  | -0.055147 | 5.411966  |
| 114 | 1 | 0 | 2.562756  | -1.514548 | 4.701685  |
| 115 | 1 | 0 | 3.605758  | -0.238898 | 5.375122  |
| 116 | 6 | 0 | 4.972297  | 0.726450  | 2.329339  |
| 117 | 1 | 0 | 4.647932  | 1.695089  | 1.928965  |

|     |   |   |           |           |           |
|-----|---|---|-----------|-----------|-----------|
| 118 | 1 | 0 | 5.467960  | 0.894124  | 3.294847  |
| 119 | 1 | 0 | 5.717509  | 0.316759  | 1.638072  |
| 120 | 6 | 0 | 4.317429  | -1.624451 | 2.800357  |
| 121 | 1 | 0 | 3.500249  | -2.352284 | 2.801156  |
| 122 | 1 | 0 | 5.035280  | -1.935987 | 2.031586  |
| 123 | 1 | 0 | 4.830091  | -1.658906 | 3.766689  |
| 124 | 6 | 0 | -2.553167 | 1.660292  | 0.211987  |
| 125 | 5 | 0 | -1.450304 | 0.803767  | 2.519975  |
| 126 | 5 | 0 | -0.779260 | 2.366193  | 2.110423  |
| 127 | 6 | 0 | -2.531200 | 0.494951  | 1.299661  |
| 128 | 5 | 0 | -5.245453 | 0.795755  | 0.487576  |
| 129 | 8 | 0 | -6.128070 | -0.061062 | 1.092409  |
| 130 | 8 | 0 | -5.459544 | 0.915225  | -0.870145 |
| 131 | 6 | 0 | -6.830623 | -0.757572 | 0.022460  |
| 132 | 6 | 0 | -6.719600 | 0.250624  | -1.168207 |
| 133 | 6 | 0 | -6.611734 | -0.388844 | -2.531392 |
| 134 | 1 | 0 | -7.523279 | -0.948344 | -2.767321 |
| 135 | 1 | 0 | -6.499261 | 0.387707  | -3.300598 |
| 136 | 1 | 0 | -5.761376 | -1.069835 | -2.606473 |
| 137 | 6 | 0 | -7.797430 | 1.313818  | -1.143699 |
| 138 | 1 | 0 | -7.535080 | 2.105039  | -1.849885 |
| 139 | 1 | 0 | -8.774261 | 0.910070  | -1.426743 |
| 140 | 1 | 0 | -7.884720 | 1.773421  | -0.151237 |
| 141 | 6 | 0 | -6.068630 | -2.053351 | -0.226181 |
| 142 | 1 | 0 | -5.999771 | -2.603778 | 0.718618  |
| 143 | 1 | 0 | -6.565996 | -2.682419 | -0.960297 |
| 144 | 1 | 0 | -5.049176 | -1.852042 | -0.565999 |
| 145 | 6 | 0 | -8.247019 | -1.047438 | 0.472260  |
| 146 | 1 | 0 | -8.827847 | -1.507329 | -0.339537 |
| 147 | 1 | 0 | -8.238175 | -1.750650 | 1.308829  |
| 148 | 1 | 0 | -8.757348 | -0.140743 | 0.801478  |

---

## P1

---

| Center<br>Number | Atomic<br>Number | Atomic<br>Type | Coordinates (Angstroms) |           |           |
|------------------|------------------|----------------|-------------------------|-----------|-----------|
|                  |                  |                | X                       | Y         | Z         |
| 1                | 5                | 0              | 3.219005                | 0.002546  | 1.559389  |
| 2                | 5                | 0              | 3.548045                | -0.884889 | -1.132335 |
| 3                | 5                | 0              | 0.988978                | -0.000487 | -0.231856 |

|    |   |   |           |           |           |
|----|---|---|-----------|-----------|-----------|
| 4  | 5 | 0 | 3.342123  | -1.427031 | 0.533537  |
| 5  | 5 | 0 | 1.966403  | -1.428862 | -0.571351 |
| 6  | 5 | 0 | 4.325295  | 0.000349  | 0.194446  |
| 7  | 5 | 0 | 2.083095  | -0.002797 | -1.606398 |
| 8  | 5 | 0 | 3.342016  | 1.428668  | 0.528640  |
| 9  | 5 | 0 | 3.547874  | 0.881071  | -1.135448 |
| 10 | 5 | 0 | 1.966666  | 1.426853  | -0.575995 |
| 11 | 1 | 0 | 1.395327  | -2.436163 | -0.802060 |
| 12 | 1 | 0 | 1.645828  | -0.004647 | -2.705368 |
| 13 | 1 | 0 | 1.395735  | 2.433499  | -0.809936 |
| 14 | 1 | 0 | 1.239972  | 1.283925  | 1.737550  |
| 15 | 1 | 0 | 3.692046  | 2.436501  | 1.034369  |
| 16 | 1 | 0 | 4.168645  | 1.525866  | -1.909589 |
| 17 | 1 | 0 | 5.492725  | 0.000668  | 0.384314  |
| 18 | 1 | 0 | 4.169070  | -1.532090 | -1.904258 |
| 19 | 1 | 0 | 3.692261  | -2.433095 | 1.042697  |
| 20 | 1 | 0 | 3.403377  | 0.004486  | 2.723310  |
| 21 | 1 | 0 | 1.239773  | -1.277921 | 1.741875  |
| 22 | 6 | 0 | 1.850079  | 0.808508  | 0.978667  |
| 23 | 6 | 0 | 1.849914  | -0.805211 | 0.981456  |
| 24 | 5 | 0 | -0.767833 | -0.000249 | -0.125955 |
| 25 | 8 | 0 | -1.536620 | -1.333824 | -0.079643 |
| 26 | 8 | 0 | -1.536256 | 1.333534  | -0.079604 |
| 27 | 6 | 0 | -2.940091 | -1.073038 | 0.004968  |
| 28 | 6 | 0 | -2.939799 | 1.073127  | 0.004997  |
| 29 | 6 | 0 | -3.530041 | -1.628225 | 1.314672  |
| 30 | 6 | 0 | -3.683103 | -1.628169 | -1.224407 |
| 31 | 6 | 0 | -3.682657 | 1.628495  | -1.224365 |
| 32 | 6 | 0 | -3.529600 | 1.628439  | 1.314715  |
| 33 | 1 | 0 | -4.598005 | -1.575144 | 1.275495  |
| 34 | 1 | 0 | -3.227872 | -2.647210 | 1.438214  |
| 35 | 1 | 0 | -3.174146 | -1.048066 | 2.140296  |
| 36 | 1 | 0 | -3.458090 | -2.668101 | -1.337598 |
| 37 | 1 | 0 | -4.737347 | -1.503914 | -1.090134 |
| 38 | 1 | 0 | -3.370120 | -1.098202 | -2.099665 |
| 39 | 1 | 0 | -4.725709 | 1.404514  | -1.142060 |
| 40 | 1 | 0 | -3.548342 | 2.688904  | -1.273273 |
| 41 | 1 | 0 | -3.290060 | 1.177938  | -2.111927 |
| 42 | 1 | 0 | -3.404237 | 2.690766  | 1.340127  |
| 43 | 1 | 0 | -4.571676 | 1.390954  | 1.365510  |
| 44 | 1 | 0 | -3.022685 | 1.189431  | 2.148507  |

---

**P2**

---

| Center<br>Number | Atomic<br>Number | Atomic<br>Type | Coordinates (Angstroms) |           |           |
|------------------|------------------|----------------|-------------------------|-----------|-----------|
|                  |                  |                | X                       | Y         | Z         |
| 1                | 5                | 0              | -2.835661               | 0.225949  | 0.014477  |
| 2                | 8                | 0              | -2.620562               | -1.096955 | 0.335367  |
| 3                | 8                | 0              | -4.128079               | 0.504269  | -0.318862 |
| 4                | 6                | 0              | -4.918000               | -0.682426 | 0.002972  |
| 5                | 6                | 0              | -3.846121               | -1.818212 | 0.004416  |
| 6                | 6                | 0              | -5.996773               | -0.835004 | -1.049711 |
| 7                | 1                | 0              | -6.569655               | -1.753263 | -0.882817 |
| 8                | 1                | 0              | -6.690616               | 0.007161  | -0.994392 |
| 9                | 1                | 0              | -5.581849               | -0.863855 | -2.058996 |
| 10               | 6                | 0              | -5.533823               | -0.436901 | 1.368680  |
| 11               | 1                | 0              | -6.140266               | 0.471358  | 1.322166  |
| 12               | 1                | 0              | -6.175577               | -1.263760 | 1.687826  |
| 13               | 1                | 0              | -4.780437               | -0.291278 | 2.154323  |
| 14               | 6                | 0              | -4.079629               | -2.896160 | 1.042489  |
| 15               | 1                | 0              | -4.982515               | -3.466823 | 0.798124  |
| 16               | 1                | 0              | -3.236273               | -3.593610 | 1.058201  |
| 17               | 1                | 0              | -4.212687               | -2.484754 | 2.046888  |
| 18               | 6                | 0              | -3.614212               | -2.432537 | -1.368143 |
| 19               | 1                | 0              | -2.735459               | -3.081805 | -1.332041 |
| 20               | 1                | 0              | -4.468629               | -3.033665 | -1.692044 |
| 21               | 1                | 0              | -3.435145               | -1.659260 | -2.121690 |
| 22               | 5                | 0              | -1.554875               | 1.310736  | 0.005594  |
| 23               | 5                | 0              | -0.933647               | 2.135208  | -1.430449 |
| 24               | 5                | 0              | -1.411380               | 3.070642  | -0.015794 |
| 25               | 5                | 0              | -0.914797               | 2.169478  | 1.413076  |
| 26               | 6                | 0              | -0.135031               | 0.816520  | 0.806158  |
| 27               | 6                | 0              | -0.142872               | 0.797686  | -0.797993 |
| 28               | 5                | 0              | 0.059763                | 3.499985  | -0.910447 |
| 29               | 5                | 0              | 0.827675                | 2.003524  | -1.440999 |
| 30               | 1                | 0              | -1.532513               | 1.994627  | -2.438960 |
| 31               | 5                | 0              | 0.069380                | 3.520349  | 0.853434  |
| 32               | 1                | 0              | -2.394944               | 3.728935  | -0.012461 |
| 33               | 5                | 0              | 0.843255                | 2.034561  | 1.411747  |
| 34               | 1                | 0              | -1.497472               | 2.059525  | 2.435517  |

---

|    |   |   |           |           |           |
|----|---|---|-----------|-----------|-----------|
| 35 | 5 | 0 | 1.318887  | 1.104584  | -0.006715 |
| 36 | 1 | 0 | -0.217355 | -0.153360 | 1.286145  |
| 37 | 1 | 0 | -0.219594 | -0.183170 | -1.254348 |
| 38 | 5 | 0 | 1.457762  | 2.855279  | -0.027209 |
| 39 | 1 | 0 | 0.134357  | 4.480910  | -1.568075 |
| 40 | 1 | 0 | 1.394941  | 1.773238  | -2.450618 |
| 41 | 1 | 0 | 0.147896  | 4.515288  | 1.489386  |
| 42 | 1 | 0 | 1.416965  | 1.824786  | 2.423401  |
| 43 | 1 | 0 | 2.527170  | 3.360854  | -0.038730 |
| 44 | 5 | 0 | 2.531173  | -0.171305 | 0.001714  |
| 45 | 8 | 0 | 3.060244  | -0.721935 | 1.339058  |
| 46 | 8 | 0 | 3.062852  | -0.737077 | -1.328256 |
| 47 | 6 | 0 | 4.432066  | -1.118560 | -1.171331 |
| 48 | 6 | 0 | 4.431414  | -1.099803 | 1.190703  |
| 49 | 6 | 0 | 5.391188  | -0.063123 | -1.752484 |
| 50 | 1 | 0 | 6.367013  | -0.488686 | -1.860004 |
| 51 | 1 | 0 | 5.033580  | 0.255399  | -2.709333 |
| 52 | 1 | 0 | 5.439373  | 0.777240  | -1.091903 |
| 53 | 6 | 0 | 4.702583  | -2.526688 | -1.733110 |
| 54 | 1 | 0 | 4.530208  | -2.528567 | -2.789133 |
| 55 | 1 | 0 | 5.718384  | -2.799830 | -1.537047 |
| 56 | 1 | 0 | 4.047114  | -3.230042 | -1.263479 |
| 57 | 6 | 0 | 4.707345  | -2.497597 | 1.775196  |
| 58 | 1 | 0 | 5.705178  | -2.796104 | 1.529994  |
| 59 | 1 | 0 | 4.595147  | -2.467913 | 2.838883  |
| 60 | 1 | 0 | 4.013430  | -3.199969 | 1.362819  |
| 61 | 6 | 0 | 5.385056  | -0.030766 | 1.755794  |
| 62 | 1 | 0 | 5.182716  | 0.113385  | 2.796552  |
| 63 | 1 | 0 | 6.397395  | -0.353899 | 1.630676  |
| 64 | 1 | 0 | 5.237652  | 0.890987  | 1.232780  |

---

## TS0

---

| Center<br>Number | Atomic<br>Number | Atomic<br>Type | Coordinates (Angstroms) |           |           |
|------------------|------------------|----------------|-------------------------|-----------|-----------|
|                  |                  |                | X                       | Y         | Z         |
| 1                | 5                | 0              | -0.583625               | 1.637796  | -0.508211 |
| 2                | 5                | 0              | 2.010284                | -0.291248 | -0.002431 |
| 3                | 5                | 0              | -1.979961               | 0.678511  | -0.338973 |
| 4                | 8                | 0              | -0.426506               | 2.629032  | 0.449328  |

|    |   |   |           |           |           |
|----|---|---|-----------|-----------|-----------|
| 5  | 8 | 0 | 0.023657  | 1.969764  | -1.701348 |
| 6  | 8 | 0 | -2.628894 | 0.464911  | 0.872900  |
| 7  | 8 | 0 | -2.875334 | 0.664066  | -1.397701 |
| 8  | 8 | 0 | 2.816156  | -0.860944 | 0.996566  |
| 9  | 8 | 0 | 2.790910  | 0.557888  | -0.796150 |
| 10 | 6 | 0 | 0.387389  | 3.366994  | -1.640066 |
| 11 | 6 | 0 | 0.426025  | 3.662943  | -0.100834 |
| 12 | 6 | 0 | 4.184089  | 0.294465  | -0.498914 |
| 13 | 6 | 0 | 4.120577  | -0.245341 | 0.959759  |
| 14 | 6 | 0 | -4.185952 | 0.330687  | -0.872268 |
| 15 | 6 | 0 | -4.036908 | 0.699221  | 0.634209  |
| 16 | 6 | 0 | -0.720664 | 4.121244  | -2.365007 |
| 17 | 1 | 0 | -0.526484 | 5.197714  | -2.406577 |
| 18 | 1 | 0 | -0.797599 | 3.744676  | -3.387786 |
| 19 | 1 | 0 | -1.689145 | 3.960356  | -1.880225 |
| 20 | 6 | 0 | 1.715013  | 3.550510  | -2.349428 |
| 21 | 1 | 0 | 1.596253  | 3.344794  | -3.416700 |
| 22 | 1 | 0 | 2.077772  | 4.579194  | -2.243617 |
| 23 | 1 | 0 | 2.463856  | 2.860709  | -1.955200 |
| 24 | 6 | 0 | -0.149907 | 5.009002  | 0.298824  |
| 25 | 1 | 0 | -0.097652 | 5.127071  | 1.384636  |
| 26 | 1 | 0 | 0.419564  | 5.826912  | -0.156131 |
| 27 | 1 | 0 | -1.195495 | 5.108955  | 0.000474  |
| 28 | 6 | 0 | 1.803228  | 3.481339  | 0.514231  |
| 29 | 1 | 0 | 2.497463  | 4.268017  | 0.199410  |
| 30 | 1 | 0 | 1.716541  | 3.521935  | 1.605170  |
| 31 | 1 | 0 | 2.222439  | 2.515219  | 0.223696  |
| 32 | 6 | 0 | -5.219438 | 1.144600  | -1.625310 |
| 33 | 1 | 0 | -5.250888 | 0.831979  | -2.672351 |
| 34 | 1 | 0 | -6.218111 | 0.996570  | -1.199676 |
| 35 | 1 | 0 | -4.986895 | 2.211124  | -1.600608 |
| 36 | 6 | 0 | -4.409655 | -1.156228 | -1.093356 |
| 37 | 1 | 0 | -5.403174 | -1.469575 | -0.756677 |
| 38 | 1 | 0 | -4.324489 | -1.385416 | -2.159208 |
| 39 | 1 | 0 | -3.652512 | -1.740930 | -0.562127 |
| 40 | 6 | 0 | -4.851216 | -0.146645 | 1.591991  |
| 41 | 1 | 0 | -4.603140 | 0.122825  | 2.623376  |
| 42 | 1 | 0 | -5.923229 | 0.024442  | 1.446162  |
| 43 | 1 | 0 | -4.656865 | -1.213771 | 1.467361  |
| 44 | 6 | 0 | -4.273295 | 2.180354  | 0.908052  |
| 45 | 1 | 0 | -5.329723 | 2.450883  | 0.814718  |

|    |    |   |           |           |           |
|----|----|---|-----------|-----------|-----------|
| 46 | 1  | 0 | -3.942684 | 2.413101  | 1.923343  |
| 47 | 1  | 0 | -3.692324 | 2.803079  | 0.220512  |
| 48 | 6  | 0 | 5.163197  | -1.295625 | 1.294157  |
| 49 | 1  | 0 | 6.176986  | -0.895207 | 1.179381  |
| 50 | 1  | 0 | 5.047072  | -1.619633 | 2.331986  |
| 51 | 1  | 0 | 5.064582  | -2.176644 | 0.656849  |
| 52 | 6  | 0 | 4.141359  | 0.857017  | 2.011207  |
| 53 | 1  | 0 | 3.873542  | 0.429962  | 2.981932  |
| 54 | 1  | 0 | 5.130379  | 1.318629  | 2.099779  |
| 55 | 1  | 0 | 3.418669  | 1.645441  | 1.779286  |
| 56 | 6  | 0 | 4.975468  | 1.575165  | -0.674609 |
| 57 | 1  | 0 | 6.021117  | 1.431817  | -0.379998 |
| 58 | 1  | 0 | 4.964042  | 1.884539  | -1.723893 |
| 59 | 1  | 0 | 4.560610  | 2.391874  | -0.078238 |
| 60 | 6  | 0 | 4.656224  | -0.763247 | -1.488713 |
| 61 | 1  | 0 | 4.466793  | -0.414594 | -2.507854 |
| 62 | 1  | 0 | 5.726589  | -0.969918 | -1.388778 |
| 63 | 1  | 0 | 4.110365  | -1.701560 | -1.343902 |
| 64 | 7  | 0 | -0.192295 | -0.576953 | 2.056838  |
| 65 | 6  | 0 | 0.533047  | 0.484661  | 2.466739  |
| 66 | 6  | 0 | -1.064707 | -1.101473 | 2.956049  |
| 67 | 6  | 0 | 0.471212  | 1.038355  | 3.734803  |
| 68 | 6  | 0 | -1.165336 | -0.598777 | 4.255294  |
| 69 | 6  | 0 | -0.390265 | 0.475081  | 4.663538  |
| 70 | 1  | 0 | 1.094038  | 1.895655  | 3.968547  |
| 71 | 1  | 0 | -1.874371 | -1.063363 | 4.933809  |
| 72 | 1  | 0 | -0.468667 | 0.866735  | 5.673886  |
| 73 | 77 | 0 | 0.121851  | -1.141903 | -0.177989 |
| 74 | 6  | 0 | -0.038424 | -3.282236 | 0.019692  |
| 75 | 6  | 0 | 1.131322  | -1.744547 | -1.994376 |
| 76 | 6  | 0 | -0.120695 | -1.144646 | -2.296410 |
| 77 | 6  | 0 | -1.314415 | -3.000244 | -0.525733 |
| 78 | 6  | 0 | 1.107750  | -3.918954 | -0.734240 |
| 79 | 1  | 0 | 0.001751  | -3.506797 | 1.088677  |
| 80 | 6  | 0 | 1.392480  | -3.235756 | -2.071232 |
| 81 | 1  | 0 | 2.000941  | -1.118858 | -2.178762 |
| 82 | 6  | 0 | -1.319739 | -1.903135 | -2.801777 |
| 83 | 1  | 0 | -0.080080 | -0.103327 | -2.619418 |
| 84 | 6  | 0 | -1.648775 | -3.161463 | -1.988952 |
| 85 | 1  | 0 | -2.158613 | -3.050431 | 0.152995  |
| 86 | 1  | 0 | 2.000435  | -3.838813 | -0.101049 |



|    |   |   |           |           |           |
|----|---|---|-----------|-----------|-----------|
| 87 | 1 | 0 | 0.920746  | -4.995650 | -0.872456 |
| 88 | 1 | 0 | 2.437995  | -3.404925 | -2.353006 |
| 89 | 1 | 0 | 0.796821  | -3.677658 | -2.878125 |
| 90 | 1 | 0 | -2.173140 | -1.219218 | -2.764347 |
| 91 | 1 | 0 | -1.169632 | -2.146934 | -3.866613 |
| 92 | 1 | 0 | -1.141981 | -4.040636 | -2.407537 |
| 93 | 1 | 0 | -2.719241 | -3.376699 | -2.090574 |
| 94 | 1 | 0 | 1.180692  | 0.924125  | 1.721419  |
| 95 | 6 | 0 | -1.982244 | -2.193800 | 2.540214  |
| 96 | 1 | 0 | -2.551897 | -1.858595 | 1.670944  |
| 97 | 1 | 0 | -1.453423 | -3.106272 | 2.257539  |
| 98 | 1 | 0 | -2.676958 | -2.437899 | 3.346981  |

---

## TS1

---

| Center<br>Number | Atomic<br>Number | Atomic<br>Type | Coordinates (Angstroms) |           |           |
|------------------|------------------|----------------|-------------------------|-----------|-----------|
|                  |                  |                | X                       | Y         | Z         |
| 1                | 5                | 0              | -0.000866               | -0.818727 | 1.167509  |
| 2                | 5                | 0              | -2.249356               | -0.389229 | -0.360015 |
| 3                | 5                | 0              | 1.999753                | -0.439493 | -0.486823 |
| 4                | 8                | 0              | 2.967052                | -0.772264 | -1.424591 |
| 5                | 8                | 0              | -2.733793               | -0.813718 | 0.866880  |
| 6                | 8                | 0              | -3.245896               | 0.222619  | -1.100754 |
| 7                | 8                | 0              | -0.219756               | 0.127195  | 2.167876  |
| 8                | 8                | 0              | 0.279886                | -2.060051 | 1.711062  |
| 9                | 8                | 0              | 2.599770                | -0.270700 | 0.763592  |
| 10               | 6                | 0              | -4.505285               | 0.014226  | -0.401350 |
| 11               | 6                | 0              | -4.022372               | -0.173794 | 1.064066  |
| 12               | 6                | 0              | 4.182716                | -1.142678 | -0.729061 |
| 13               | 6                | 0              | 4.038772                | -0.401569 | 0.638091  |
| 14               | 6                | 0              | 0.057480                | -2.006936 | 3.137926  |
| 15               | 6                | 0              | 0.082090                | -0.468864 | 3.454085  |
| 16               | 6                | 0              | -1.297026               | -2.658663 | 3.390723  |
| 17               | 1                | 0              | -1.264739               | -3.692681 | 3.032402  |
| 18               | 1                | 0              | -1.553748               | -2.673512 | 4.451867  |
| 19               | 1                | 0              | -2.081874               | -2.137773 | 2.835687  |
| 20               | 6                | 0              | -0.971473               | -0.015172 | 4.445991  |
| 21               | 1                | 0              | -0.795756               | -0.457330 | 5.433272  |
| 22               | 1                | 0              | -0.930337               | 1.072784  | 4.557677  |

|    |   |   |           |           |           |
|----|---|---|-----------|-----------|-----------|
| 23 | 1 | 0 | -1.979096 | -0.289317 | 4.122055  |
| 24 | 6 | 0 | 1.450301  | 0.050214  | 3.871519  |
| 25 | 1 | 0 | 1.412725  | 1.144530  | 3.939595  |
| 26 | 1 | 0 | 1.757161  | -0.335164 | 4.847690  |
| 27 | 1 | 0 | 2.203178  | -0.213184 | 3.127860  |
| 28 | 6 | 0 | 1.157294  | -2.799464 | 3.819299  |
| 29 | 1 | 0 | 1.051274  | -2.759767 | 4.908882  |
| 30 | 1 | 0 | 1.098942  | -3.848889 | 3.516237  |
| 31 | 1 | 0 | 2.146637  | -2.422956 | 3.554734  |
| 32 | 6 | 0 | 4.555673  | -1.181945 | 1.831266  |
| 33 | 1 | 0 | 5.620343  | -1.411296 | 1.716552  |
| 34 | 1 | 0 | 4.442315  | -0.593484 | 2.748746  |
| 35 | 1 | 0 | 4.015501  | -2.123499 | 1.962984  |
| 36 | 6 | 0 | 4.627880  | 0.999905  | 0.642485  |
| 37 | 1 | 0 | 4.317687  | 1.516664  | 1.556840  |
| 38 | 1 | 0 | 5.721705  | 0.979543  | 0.624321  |
| 39 | 1 | 0 | 4.279966  | 1.590871  | -0.208566 |
| 40 | 6 | 0 | 4.157562  | -2.658541 | -0.575925 |
| 41 | 1 | 0 | 4.110986  | -3.120188 | -1.566848 |
| 42 | 1 | 0 | 5.054266  | -3.032298 | -0.074543 |
| 43 | 1 | 0 | 3.280159  | -2.984758 | -0.006791 |
| 44 | 6 | 0 | 5.369982  | -0.709353 | -1.563629 |
| 45 | 1 | 0 | 6.311670  | -0.916025 | -1.039280 |
| 46 | 1 | 0 | 5.384081  | -1.261443 | -2.505449 |
| 47 | 1 | 0 | 5.330391  | 0.357020  | -1.795153 |
| 48 | 6 | 0 | -3.761619 | 1.151523  | 1.763348  |
| 49 | 1 | 0 | -4.691251 | 1.666670  | 2.019636  |
| 50 | 1 | 0 | -3.198147 | 0.973428  | 2.682003  |
| 51 | 1 | 0 | -3.169609 | 1.818540  | 1.126368  |
| 52 | 6 | 0 | -4.888916 | -1.074616 | 1.918323  |
| 53 | 1 | 0 | -4.476070 | -1.144010 | 2.930870  |
| 54 | 1 | 0 | -5.904457 | -0.677177 | 1.999283  |
| 55 | 1 | 0 | -4.942849 | -2.087319 | 1.508713  |
| 56 | 6 | 0 | -5.138579 | -1.244163 | -0.973570 |
| 57 | 1 | 0 | -6.124318 | -1.433331 | -0.537452 |
| 58 | 1 | 0 | -5.260306 | -1.128412 | -2.054753 |
| 59 | 1 | 0 | -4.510797 | -2.119999 | -0.791594 |
| 60 | 6 | 0 | -5.388483 | 1.222444  | -0.638780 |
| 61 | 1 | 0 | -5.667320 | 1.281191  | -1.691923 |
| 62 | 1 | 0 | -6.310402 | 1.150275  | -0.050241 |
| 63 | 1 | 0 | -4.882140 | 2.151885  | -0.372380 |

|     |    |   |           |           |           |
|-----|----|---|-----------|-----------|-----------|
| 64  | 5  | 0 | 0.106539  | 2.030094  | -0.489260 |
| 65  | 5  | 0 | 1.695353  | 2.685728  | -0.902373 |
| 66  | 5  | 0 | 0.899562  | 3.867815  | 1.575358  |
| 67  | 5  | 0 | -0.535676 | 4.538467  | 0.795392  |
| 68  | 1  | 0 | -0.823700 | 2.256672  | 1.655544  |
| 69  | 5  | 0 | 2.185051  | 3.797851  | 0.373184  |
| 70  | 1  | 0 | 1.582475  | 1.607949  | 1.283537  |
| 71  | 5  | 0 | 1.551424  | 4.423881  | -1.147175 |
| 72  | 1  | 0 | 2.485721  | 1.954296  | -1.385411 |
| 73  | 5  | 0 | -0.130772 | 4.880145  | -0.888047 |
| 74  | 1  | 0 | 0.025728  | 3.123836  | -2.821922 |
| 75  | 1  | 0 | -2.166573 | 3.168892  | -0.646124 |
| 76  | 5  | 0 | 1.063852  | 5.160539  | 0.391948  |
| 77  | 1  | 0 | 1.075168  | 3.841738  | 2.740638  |
| 78  | 1  | 0 | -1.354910 | 5.038689  | 1.481734  |
| 79  | 1  | 0 | 3.302516  | 3.781921  | 0.757824  |
| 80  | 1  | 0 | 2.259840  | 4.978021  | -1.914547 |
| 81  | 1  | 0 | -0.655731 | 5.766909  | -1.470371 |
| 82  | 1  | 0 | 1.414635  | 6.238384  | 0.734077  |
| 83  | 77 | 0 | -0.133543 | -0.396975 | -0.855911 |
| 84  | 6  | 0 | -0.775452 | 0.122998  | -3.090886 |
| 85  | 6  | 0 | -1.301932 | -2.162533 | -1.436495 |
| 86  | 6  | 0 | 0.118213  | -2.445570 | -1.341757 |
| 87  | 6  | 0 | 0.552522  | -0.263928 | -3.133935 |
| 88  | 6  | 0 | -1.905893 | -0.774940 | -3.534137 |
| 89  | 1  | 0 | -1.004622 | 1.187290  | -3.037131 |
| 90  | 6  | 0 | -1.992998 | -2.118496 | -2.797293 |
| 91  | 1  | 0 | -1.891445 | -2.617805 | -0.636805 |
| 92  | 6  | 0 | 0.969244  | -2.732817 | -2.556111 |
| 93  | 1  | 0 | 0.406352  | -3.027238 | -0.464128 |
| 94  | 6  | 0 | 0.948369  | -1.635581 | -3.628164 |
| 95  | 1  | 0 | 1.326960  | 0.501418  | -3.100169 |
| 96  | 1  | 0 | -2.839859 | -0.230195 | -3.395736 |
| 97  | 1  | 0 | -1.807216 | -0.952303 | -4.615301 |
| 98  | 1  | 0 | -3.047085 | -2.380870 | -2.664879 |
| 99  | 1  | 0 | -1.566641 | -2.925080 | -3.411726 |
| 100 | 1  | 0 | 1.994954  | -2.865134 | -2.213246 |
| 101 | 1  | 0 | 0.667978  | -3.700125 | -2.990680 |
| 102 | 1  | 0 | 0.257159  | -1.914485 | -4.436109 |
| 103 | 1  | 0 | 1.939278  | -1.570927 | -4.091244 |
| 104 | 1  | 0 | -0.835966 | 1.143925  | -0.498823 |

|     |   |   |           |          |           |
|-----|---|---|-----------|----------|-----------|
| 105 | 6 | 0 | 1.227550  | 2.456598 | 0.700530  |
| 106 | 5 | 0 | -1.021097 | 3.420944 | -0.474243 |
| 107 | 5 | 0 | 0.258173  | 3.335998 | -1.680809 |
| 108 | 6 | 0 | -0.303251 | 2.882881 | 0.938628  |

---

### TS1u

---

| Center<br>Number | Atomic<br>Number | Atomic<br>Type | Coordinates (Angstroms) |           |           |
|------------------|------------------|----------------|-------------------------|-----------|-----------|
|                  |                  |                | X                       | Y         | Z         |
| 1                | 5                | 0              | -0.026343               | 1.546343  | -0.456788 |
| 2                | 5                | 0              | -2.200625               | 0.043169  | 0.483930  |
| 3                | 5                | 0              | 2.085415                | 0.096580  | 0.422121  |
| 4                | 8                | 0              | 3.107323                | -0.460643 | 1.178342  |
| 5                | 8                | 0              | -2.930596               | 1.214940  | 0.440214  |
| 6                | 8                | 0              | -3.000369               | -1.048412 | 0.171940  |
| 7                | 8                | 0              | -0.430148               | 1.525073  | -1.778964 |
| 8                | 8                | 0              | 0.315477                | 2.818701  | -0.041924 |
| 9                | 8                | 0              | 2.603080                | 0.879907  | -0.592920 |
| 10               | 6                | 0              | -4.374971               | -0.592006 | 0.028484  |
| 11               | 6                | 0              | -4.187055               | 0.932862  | -0.235072 |
| 12               | 6                | 0              | 4.364666                | 0.143471  | 0.777942  |
| 13               | 6                | 0              | 4.043721                | 0.724829  | -0.637746 |
| 14               | 6                | 0              | -0.060566               | 3.737877  | -1.099129 |
| 15               | 6                | 0              | -0.099699               | 2.813967  | -2.357143 |
| 16               | 6                | 0              | -1.426960               | 4.293664  | -0.722674 |
| 17               | 1                | 0              | -1.358563               | 4.782258  | 0.253303  |
| 18               | 1                | 0              | -1.784281               | 5.029042  | -1.450690 |
| 19               | 1                | 0              | -2.160711               | 3.485901  | -0.639302 |
| 20               | 6                | 0              | -1.157384               | 3.176673  | -3.380251 |
| 21               | 1                | 0              | -0.950318               | 4.159134  | -3.818348 |
| 22               | 1                | 0              | -1.156519               | 2.440685  | -4.189232 |
| 23               | 1                | 0              | -2.158528               | 3.199981  | -2.947019 |
| 24               | 6                | 0              | 1.254122                | 2.665031  | -3.036514 |
| 25               | 1                | 0              | 1.190656                | 1.871078  | -3.785898 |
| 26               | 1                | 0              | 1.557475                | 3.589800  | -3.537972 |
| 27               | 1                | 0              | 2.017498                | 2.377373  | -2.310949 |
| 28               | 6                | 0              | 0.973362                | 4.843714  | -1.162192 |
| 29               | 1                | 0              | 0.771817                | 5.519375  | -2.000796 |
| 30               | 1                | 0              | 0.948382                | 5.434686  | -0.242380 |

|    |   |   |           |           |           |
|----|---|---|-----------|-----------|-----------|
| 31 | 1 | 0 | 1.981346  | 4.439339  | -1.278711 |
| 32 | 6 | 0 | 4.657012  | 2.085775  | -0.915666 |
| 33 | 1 | 0 | 5.750361  | 2.041147  | -0.862137 |
| 34 | 1 | 0 | 4.388703  | 2.416968  | -1.923197 |
| 35 | 1 | 0 | 4.305329  | 2.839936  | -0.208390 |
| 36 | 6 | 0 | 4.366651  | -0.228035 | -1.777802 |
| 37 | 1 | 0 | 3.948654  | 0.168180  | -2.707561 |
| 38 | 1 | 0 | 5.447453  | -0.343109 | -1.907851 |
| 39 | 1 | 0 | 3.931023  | -1.216769 | -1.615337 |
| 40 | 6 | 0 | 4.685708  | 1.222674  | 1.803607  |
| 41 | 1 | 0 | 4.754571  | 0.770932  | 2.797295  |
| 42 | 1 | 0 | 5.639493  | 1.715168  | 1.590608  |
| 43 | 1 | 0 | 3.904230  | 1.989172  | 1.830699  |
| 44 | 6 | 0 | 5.437421  | -0.927549 | 0.794863  |
| 45 | 1 | 0 | 6.394398  | -0.528149 | 0.441246  |
| 46 | 1 | 0 | 5.582729  | -1.293162 | 1.814944  |
| 47 | 1 | 0 | 5.166896  | -1.778806 | 0.167404  |
| 48 | 6 | 0 | -3.981623 | 1.259411  | -1.706339 |
| 49 | 1 | 0 | -4.884475 | 1.066595  | -2.293666 |
| 50 | 1 | 0 | -3.737325 | 2.320264  | -1.805101 |
| 51 | 1 | 0 | -3.149954 | 0.689271  | -2.131714 |
| 52 | 6 | 0 | -5.262051 | 1.820036  | 0.358853  |
| 53 | 1 | 0 | -5.035263 | 2.868715  | 0.148067  |
| 54 | 1 | 0 | -6.239909 | 1.594326  | -0.079803 |
| 55 | 1 | 0 | -5.334186 | 1.703446  | 1.441930  |
| 56 | 6 | 0 | -5.085454 | -0.886401 | 1.340456  |
| 57 | 1 | 0 | -6.151935 | -0.648176 | 1.283068  |
| 58 | 1 | 0 | -4.984751 | -1.948850 | 1.578945  |
| 59 | 1 | 0 | -4.652511 | -0.309538 | 2.163472  |
| 60 | 6 | 0 | -5.008100 | -1.366850 | -1.109726 |
| 61 | 1 | 0 | -5.090621 | -2.424461 | -0.843209 |
| 62 | 1 | 0 | -6.016629 | -0.997385 | -1.323603 |
| 63 | 1 | 0 | -4.412197 | -1.295148 | -2.022322 |
| 64 | 5 | 0 | 0.216072  | -1.722397 | -0.808792 |
| 65 | 5 | 0 | -0.647996 | -1.898674 | -2.379400 |
| 66 | 5 | 0 | 1.104905  | -1.758905 | -2.349751 |
| 67 | 5 | 0 | 1.689286  | -2.703985 | -0.980598 |
| 68 | 6 | 0 | 0.305900  | -3.367956 | -0.319851 |
| 69 | 6 | 0 | -1.011217 | -2.916010 | -1.108520 |
| 70 | 5 | 0 | 0.314488  | -2.884777 | -3.472600 |
| 71 | 5 | 0 | -1.080536 | -3.582290 | -2.649659 |

|     |    |   |           |           |           |
|-----|----|---|-----------|-----------|-----------|
| 72  | 1  | 0 | -1.426901 | -1.049584 | -2.645858 |
| 73  | 5  | 0 | 1.762654  | -3.386311 | -2.604936 |
| 74  | 1  | 0 | 1.642527  | -0.768040 | -2.704075 |
| 75  | 5  | 0 | 1.261377  | -4.392365 | -1.249030 |
| 76  | 1  | 0 | 2.588080  | -2.472421 | -0.251950 |
| 77  | 5  | 0 | -0.495930 | -4.510697 | -1.277528 |
| 78  | 1  | 0 | 0.199634  | -3.542034 | 0.744601  |
| 79  | 1  | 0 | -1.903243 | -2.745099 | -0.510831 |
| 80  | 5  | 0 | 0.406758  | -4.517323 | -2.786491 |
| 81  | 1  | 0 | 0.294604  | -2.690414 | -4.640295 |
| 82  | 1  | 0 | -2.147264 | -3.848848 | -3.082602 |
| 83  | 1  | 0 | 2.809632  | -3.560009 | -3.132479 |
| 84  | 1  | 0 | 1.863357  | -5.237292 | -0.684430 |
| 85  | 1  | 0 | -1.110109 | -5.350675 | -0.722923 |
| 86  | 1  | 0 | 0.460606  | -5.504413 | -3.436749 |
| 87  | 77 | 0 | -0.051504 | -0.129473 | 0.814177  |
| 88  | 6  | 0 | -0.788282 | -1.716687 | 2.305552  |
| 89  | 6  | 0 | -0.784444 | 1.127487  | 2.493296  |
| 90  | 6  | 0 | 0.633364  | 1.207853  | 2.463965  |
| 91  | 6  | 0 | 0.602576  | -1.616578 | 2.455060  |
| 92  | 6  | 0 | -1.766745 | -1.113758 | 3.284138  |
| 93  | 1  | 0 | -1.210043 | -2.524426 | 1.707925  |
| 94  | 6  | 0 | -1.519923 | 0.370344  | 3.587529  |
| 95  | 1  | 0 | -1.316226 | 1.964337  | 2.048246  |
| 96  | 6  | 0 | 1.496200  | 0.542066  | 3.506259  |
| 97  | 1  | 0 | 1.047198  | 2.106720  | 2.012355  |
| 98  | 6  | 0 | 1.222602  | -0.955354 | 3.670624  |
| 99  | 1  | 0 | 1.248813  | -2.319886 | 1.934827  |
| 100 | 1  | 0 | -2.766565 | -1.234432 | 2.855341  |
| 101 | 1  | 0 | -1.770782 | -1.697009 | 4.218453  |
| 102 | 1  | 0 | -2.482204 | 0.864477  | 3.763710  |
| 103 | 1  | 0 | -0.958044 | 0.480100  | 4.524597  |
| 104 | 1  | 0 | 2.540573  | 0.683993  | 3.230029  |
| 105 | 1  | 0 | 1.357242  | 1.068693  | 4.463732  |
| 106 | 1  | 0 | 0.566751  | -1.131899 | 4.533308  |
| 107 | 1  | 0 | 2.161474  | -1.467775 | 3.901133  |
| 108 | 1  | 0 | -0.584405 | -0.545527 | -0.681391 |

---

**TS2**

---

| Center<br>Number | Atomic<br>Number | Atomic<br>Type | Coordinates (Angstroms) |           |           |
|------------------|------------------|----------------|-------------------------|-----------|-----------|
|                  |                  |                | X                       | Y         | Z         |
| 1                | 5                | 0              | -0.023702               | 1.509877  | -0.435148 |
| 2                | 5                | 0              | -2.233223               | -0.052280 | 0.446692  |
| 3                | 5                | 0              | 2.055965                | 0.059927  | 0.532948  |
| 4                | 8                | 0              | 3.076234                | -0.316582 | 1.390171  |
| 5                | 8                | 0              | -2.765798               | 1.040824  | -0.230517 |
| 6                | 8                | 0              | -3.217625               | -0.992041 | 0.692302  |
| 7                | 8                | 0              | -0.254660               | 1.444117  | -1.803037 |
| 8                | 8                | 0              | 0.214184                | 2.799424  | -0.016289 |
| 9                | 8                | 0              | 2.584803                | 0.700951  | -0.588730 |
| 10               | 6                | 0              | -4.497319               | -0.411623 | 0.323782  |
| 11               | 6                | 0              | -4.072292               | 0.652721  | -0.723811 |
| 12               | 6                | 0              | 4.299430                | 0.340003  | 0.974506  |
| 13               | 6                | 0              | 4.036559                | 0.654089  | -0.531623 |
| 14               | 6                | 0              | -0.120257               | 3.689815  | -1.113528 |
| 15               | 6                | 0              | -0.013983               | 2.757520  | -2.366899 |
| 16               | 6                | 0              | -1.534855               | 4.185161  | -0.848759 |
| 17               | 1                | 0              | -1.557305               | 4.695401  | 0.118139  |
| 18               | 1                | 0              | -1.870207               | 4.891885  | -1.614550 |
| 19               | 1                | 0              | -2.232884               | 3.345224  | -0.801942 |
| 20               | 6                | 0              | -1.060621               | 3.017389  | -3.432356 |
| 21               | 1                | 0              | -0.952900               | 4.024020  | -3.850719 |
| 22               | 1                | 0              | -0.945018               | 2.301490  | -4.251581 |
| 23               | 1                | 0              | -2.072636               | 2.916623  | -3.033291 |
| 24               | 6                | 0              | 1.378025                | 2.722490  | -2.979183 |
| 25               | 1                | 0              | 1.422106                | 1.917848  | -3.720631 |
| 26               | 1                | 0              | 1.629548                | 3.662500  | -3.480405 |
| 27               | 1                | 0              | 2.126167                | 2.511012  | -2.212857 |
| 28               | 6                | 0              | 0.860146                | 4.845437  | -1.107251 |
| 29               | 1                | 0              | 0.684108                | 5.509425  | -1.960593 |
| 30               | 1                | 0              | 0.736312                | 5.434042  | -0.194463 |
| 31               | 1                | 0              | 1.894698                | 4.498256  | -1.148575 |
| 32               | 6                | 0              | 4.580782                | 1.991963  | -0.997948 |
| 33               | 1                | 0              | 5.664965                | 2.043902  | -0.849744 |
| 34               | 1                | 0              | 4.388234                | 2.127088  | -2.066180 |
| 35               | 1                | 0              | 4.119189                | 2.824250  | -0.461430 |

|    |   |   |           |           |           |
|----|---|---|-----------|-----------|-----------|
| 36 | 6 | 0 | 4.494542  | -0.445101 | -1.477480 |
| 37 | 1 | 0 | 4.114833  | -0.236486 | -2.483558 |
| 38 | 1 | 0 | 5.586084  | -0.496603 | -1.537521 |
| 39 | 1 | 0 | 4.123364  | -1.426205 | -1.171144 |
| 40 | 6 | 0 | 4.431056  | 1.598704  | 1.823049  |
| 41 | 1 | 0 | 4.463112  | 1.321413  | 2.880256  |
| 42 | 1 | 0 | 5.345294  | 2.154325  | 1.592849  |
| 43 | 1 | 0 | 3.575182  | 2.266010  | 1.672857  |
| 44 | 6 | 0 | 5.461996  | -0.596936 | 1.232556  |
| 45 | 1 | 0 | 6.401678  | -0.163819 | 0.872506  |
| 46 | 1 | 0 | 5.565072  | -0.775490 | 2.306138  |
| 47 | 1 | 0 | 5.316184  | -1.562618 | 0.744466  |
| 48 | 6 | 0 | -3.861742 | 0.057986  | -2.110655 |
| 49 | 1 | 0 | -4.810308 | -0.173939 | -2.605026 |
| 50 | 1 | 0 | -3.313450 | 0.773245  | -2.730854 |
| 51 | 1 | 0 | -3.273276 | -0.864483 | -2.053320 |
| 52 | 6 | 0 | -4.957168 | 1.879814  | -0.794289 |
| 53 | 1 | 0 | -4.591570 | 2.565308  | -1.565159 |
| 54 | 1 | 0 | -5.985165 | 1.605417  | -1.054800 |
| 55 | 1 | 0 | -4.972765 | 2.419655  | 0.155021  |
| 56 | 6 | 0 | -5.084074 | 0.212947  | 1.581726  |
| 57 | 1 | 0 | -6.086414 | 0.615986  | 1.405894  |
| 58 | 1 | 0 | -5.155532 | -0.544727 | 2.367039  |
| 59 | 1 | 0 | -4.446667 | 1.025080  | 1.946612  |
| 60 | 6 | 0 | -5.393274 | -1.511936 | -0.204290 |
| 61 | 1 | 0 | -5.631176 | -2.218957 | 0.594772  |
| 62 | 1 | 0 | -6.336457 | -1.099792 | -0.579640 |
| 63 | 1 | 0 | -4.912194 | -2.068657 | -1.010923 |
| 64 | 5 | 0 | 0.186065  | -1.834793 | -0.663396 |
| 65 | 5 | 0 | 1.692773  | -2.780480 | -0.795989 |
| 66 | 5 | 0 | 0.742349  | -2.466226 | -3.463273 |
| 67 | 5 | 0 | -0.757793 | -3.279841 | -3.020664 |
| 68 | 1 | 0 | -0.782778 | -0.878206 | -2.633798 |
| 69 | 5 | 0 | 2.037031  | -3.143218 | -2.485917 |
| 70 | 1 | 0 | 1.698849  | -0.750634 | -2.119713 |
| 71 | 5 | 0 | 1.343275  | -4.380556 | -1.443626 |
| 72 | 1 | 0 | 2.575129  | -2.478185 | -0.071520 |
| 73 | 5 | 0 | -0.388174 | -4.460530 | -1.771181 |
| 74 | 1 | 0 | 0.020239  | -3.988349 | 0.755284  |
| 75 | 1 | 0 | -2.199758 | -2.677800 | -0.987900 |
| 76 | 5 | 0 | 0.753156  | -4.184955 | -3.103966 |



|     |    |   |           |           |           |
|-----|----|---|-----------|-----------|-----------|
| 77  | 1  | 0 | 0.906950  | -1.866804 | -4.465353 |
| 78  | 1  | 0 | -1.641973 | -3.273787 | -3.804884 |
| 79  | 1  | 0 | 3.143294  | -3.045188 | -2.891163 |
| 80  | 1  | 0 | 1.981782  | -5.317701 | -1.103078 |
| 81  | 1  | 0 | -1.016670 | -5.459354 | -1.675608 |
| 82  | 1  | 0 | 0.956858  | -4.972374 | -3.963168 |
| 83  | 77 | 0 | -0.092432 | -0.182445 | 0.845823  |
| 84  | 6  | 0 | -0.838035 | -1.787050 | 2.354858  |
| 85  | 6  | 0 | -0.984555 | 1.045873  | 2.491881  |
| 86  | 6  | 0 | 0.432321  | 1.181898  | 2.519125  |
| 87  | 6  | 0 | 0.543305  | -1.647704 | 2.523166  |
| 88  | 6  | 0 | -1.834996 | -1.232216 | 3.339818  |
| 89  | 1  | 0 | -1.207515 | -2.593469 | 1.727402  |
| 90  | 6  | 0 | -1.709805 | 0.277299  | 3.584267  |
| 91  | 1  | 0 | -1.528205 | 1.871753  | 2.036137  |
| 92  | 6  | 0 | 1.280873  | 0.564698  | 3.602543  |
| 93  | 1  | 0 | 0.826274  | 2.097713  | 2.084937  |
| 94  | 6  | 0 | 1.119141  | -0.953921 | 3.741586  |
| 95  | 1  | 0 | 1.193556  | -2.353994 | 2.011705  |
| 96  | 1  | 0 | -2.833891 | -1.459757 | 2.966098  |
| 97  | 1  | 0 | -1.730592 | -1.774232 | 4.292461  |
| 98  | 1  | 0 | -2.709377 | 0.706267  | 3.714121  |
| 99  | 1  | 0 | -1.185779 | 0.467751  | 4.531467  |
| 100 | 1  | 0 | 2.324675  | 0.792406  | 3.384643  |
| 101 | 1  | 0 | 1.051336  | 1.066065  | 4.556423  |
| 102 | 1  | 0 | 0.474660  | -1.185771 | 4.601185  |
| 103 | 1  | 0 | 2.093052  | -1.396816 | 3.968276  |
| 104 | 1  | 0 | -0.244937 | -0.384781 | -0.747609 |
| 105 | 6  | 0 | 1.248215  | -1.736705 | -2.022518 |
| 106 | 6  | 0 | -0.325414 | -1.817866 | -2.331563 |
| 107 | 5  | 0 | -1.091530 | -2.905553 | -1.326195 |
| 108 | 5  | 0 | 0.199159  | -3.588601 | -0.343842 |

---

**TS2u**

---

| Center<br>Number | Atomic<br>Number | Atomic<br>Type | Coordinates (Angstroms) |           |           |
|------------------|------------------|----------------|-------------------------|-----------|-----------|
|                  |                  |                | X                       | Y         | Z         |
| 1                | 5                | 0              | -0.552401               | 1.492321  | -0.665391 |
| 2                | 5                | 0              | -2.042830               | -0.234558 | 0.528052  |
| 3                | 5                | 0              | 2.286148                | 0.253868  | 0.393789  |
| 4                | 8                | 0              | 3.386936                | -0.307308 | 1.005824  |
| 5                | 8                | 0              | -2.914836               | 0.846320  | 0.477180  |
| 6                | 8                | 0              | -2.762488               | -1.419627 | 0.505526  |
| 7                | 8                | 0              | -1.166499               | 1.465662  | -1.895543 |
| 8                | 8                | 0              | -0.336360               | 2.763775  | -0.191153 |
| 9                | 8                | 0              | 2.662344                | 1.184583  | -0.563051 |
| 10               | 6                | 0              | -4.185619               | -1.130336 | 0.501582  |
| 11               | 6                | 0              | -4.222642               | 0.366810  | 0.064152  |
| 12               | 6                | 0              | 4.585201                | 0.352969  | 0.509653  |
| 13               | 6                | 0              | 4.088939                | 1.062874  | -0.794122 |
| 14               | 6                | 0              | -0.979177               | 3.675898  | -1.127052 |
| 15               | 6                | 0              | -1.029928               | 2.813631  | -2.426174 |
| 16               | 6                | 0              | -2.352987               | 4.005645  | -0.567266 |
| 17               | 1                | 0              | -2.240836               | 4.427721  | 0.435320  |
| 18               | 1                | 0              | -2.875626               | 4.738195  | -1.190240 |
| 19               | 1                | 0              | -2.961510               | 3.101850  | -0.482271 |
| 20               | 6                | 0              | -2.195268               | 3.107549  | -3.344911 |
| 21               | 1                | 0              | -2.118806               | 4.123894  | -3.745724 |
| 22               | 1                | 0              | -2.189966               | 2.411311  | -4.187419 |
| 23               | 1                | 0              | -3.154674               | 3.012912  | -2.833758 |
| 24               | 6                | 0              | 0.282990                | 2.831959  | -3.199730 |
| 25               | 1                | 0              | 0.253113                | 2.059119  | -3.971758 |
| 26               | 1                | 0              | 0.454430                | 3.798585  | -3.683356 |
| 27               | 1                | 0              | 1.129697                | 2.611982  | -2.540461 |
| 28               | 6                | 0              | -0.120521               | 4.919150  | -1.231851 |
| 29               | 1                | 0              | -0.503338               | 5.589516  | -2.008915 |
| 30               | 1                | 0              | -0.131186               | 5.464428  | -0.284409 |
| 31               | 1                | 0              | 0.916163                | 4.669698  | -1.467579 |
| 32               | 6                | 0              | 4.654039                | 2.453377  | -1.018107 |
| 33               | 1                | 0              | 5.742790                | 2.419568  | -1.133779 |
| 34               | 1                | 0              | 4.234966                | 2.876207  | -1.935557 |
| 35               | 1                | 0              | 4.414264                | 3.131874  | -0.197185 |

---

|    |   |   |           |           |           |
|----|---|---|-----------|-----------|-----------|
| 36 | 6 | 0 | 4.268014  | 0.226778  | -2.052793 |
| 37 | 1 | 0 | 3.739525  | 0.707744  | -2.880551 |
| 38 | 1 | 0 | 5.323609  | 0.134308  | -2.326631 |
| 39 | 1 | 0 | 3.850513  | -0.776011 | -1.936019 |
| 40 | 6 | 0 | 5.034129  | 1.328540  | 1.587365  |
| 41 | 1 | 0 | 5.165007  | 0.791127  | 2.531228  |
| 42 | 1 | 0 | 5.986039  | 1.803381  | 1.330043  |
| 43 | 1 | 0 | 4.294360  | 2.118965  | 1.744574  |
| 44 | 6 | 0 | 5.647353  | -0.705734 | 0.287938  |
| 45 | 1 | 0 | 6.549187  | -0.266535 | -0.152211 |
| 46 | 1 | 0 | 5.926707  | -1.159783 | 1.242515  |
| 47 | 1 | 0 | 5.291847  | -1.499376 | -0.372171 |
| 48 | 6 | 0 | -4.312367 | 0.543088  | -1.444102 |
| 49 | 1 | 0 | -5.274249 | 0.194088  | -1.831693 |
| 50 | 1 | 0 | -4.215979 | 1.604381  | -1.687543 |
| 51 | 1 | 0 | -3.506177 | 0.014022  | -1.960406 |
| 52 | 6 | 0 | -5.279770 | 1.207215  | 0.753578  |
| 53 | 1 | 0 | -5.222105 | 2.240429  | 0.399614  |
| 54 | 1 | 0 | -6.284186 | 0.833210  | 0.527441  |
| 55 | 1 | 0 | -5.150930 | 1.217303  | 1.837776  |
| 56 | 6 | 0 | -4.700356 | -1.354637 | 1.915112  |
| 57 | 1 | 0 | -5.788250 | -1.248085 | 1.967294  |
| 58 | 1 | 0 | -4.441862 | -2.366213 | 2.240342  |
| 59 | 1 | 0 | -4.257315 | -0.646197 | 2.620878  |
| 60 | 6 | 0 | -4.851813 | -2.093768 | -0.461511 |
| 61 | 1 | 0 | -4.761713 | -3.117854 | -0.087731 |
| 62 | 1 | 0 | -5.918711 | -1.869759 | -0.567606 |
| 63 | 1 | 0 | -4.388597 | -2.055288 | -1.449816 |
| 64 | 5 | 0 | 0.337594  | -1.751284 | -0.757934 |
| 65 | 5 | 0 | -0.740199 | -1.944529 | -2.113701 |
| 66 | 5 | 0 | 0.962187  | -1.606830 | -2.376834 |
| 67 | 5 | 0 | 1.866153  | -2.502089 | -1.167600 |
| 68 | 6 | 0 | 0.712016  | -3.330797 | -0.310036 |
| 69 | 6 | 0 | -0.760344 | -3.024970 | -0.846706 |
| 70 | 5 | 0 | 0.127105  | -2.790359 | -3.397490 |
| 71 | 5 | 0 | -1.014302 | -3.663686 | -2.380631 |
| 72 | 1 | 0 | -1.651205 | -1.201177 | -2.231242 |
| 73 | 5 | 0 | 1.750534  | -3.136659 | -2.807152 |
| 74 | 1 | 0 | 1.335449  | -0.553290 | -2.777850 |
| 75 | 5 | 0 | 1.606961  | -4.221932 | -1.427378 |
| 76 | 1 | 0 | 2.845432  | -2.177326 | -0.592344 |

|     |    |   |           |           |           |
|-----|----|---|-----------|-----------|-----------|
| 77  | 5  | 0 | -0.101887 | -4.547067 | -1.164826 |
| 78  | 1  | 0 | 0.807686  | -3.528703 | 0.752847  |
| 79  | 1  | 0 | -1.559454 | -2.999600 | -0.114233 |
| 80  | 5  | 0 | 0.521661  | -4.416961 | -2.802742 |
| 81  | 1  | 0 | -0.115505 | -2.578797 | -4.538073 |
| 82  | 1  | 0 | -2.101583 | -4.050484 | -2.640161 |
| 83  | 1  | 0 | 2.707259  | -3.171337 | -3.507388 |
| 84  | 1  | 0 | 2.389881  | -5.002345 | -1.008953 |
| 85  | 1  | 0 | -0.516620 | -5.465509 | -0.551144 |
| 86  | 1  | 0 | 0.571032  | -5.377465 | -3.493412 |
| 87  | 77 | 0 | 0.148171  | -0.122549 | 0.744781  |
| 88  | 6  | 0 | -0.328802 | -1.548602 | 2.337006  |
| 89  | 6  | 0 | -0.641552 | 1.284715  | 2.437985  |
| 90  | 6  | 0 | 0.730380  | 1.539337  | 2.298638  |
| 91  | 6  | 0 | 1.073969  | -1.282630 | 2.373484  |
| 92  | 6  | 0 | -1.285502 | -1.018352 | 3.379981  |
| 93  | 1  | 0 | -0.666338 | -2.481250 | 1.884459  |
| 94  | 6  | 0 | -1.199081 | 0.496233  | 3.605667  |
| 95  | 1  | 0 | -1.319244 | 1.954393  | 1.917532  |
| 96  | 6  | 0 | 1.763841  | 1.027040  | 3.269573  |
| 97  | 1  | 0 | 1.008217  | 2.395861  | 1.688777  |
| 98  | 6  | 0 | 1.708424  | -0.485157 | 3.499961  |
| 99  | 1  | 0 | 1.735039  | -2.005679 | 1.900329  |
| 100 | 1  | 0 | -2.294289 | -1.281731 | 3.052259  |
| 101 | 1  | 0 | -1.131472 | -1.554074 | 4.329902  |
| 102 | 1  | 0 | -2.196818 | 0.883588  | 3.841222  |
| 103 | 1  | 0 | -0.585042 | 0.707714  | 4.491001  |
| 104 | 1  | 0 | 2.753889  | 1.293432  | 2.897380  |
| 105 | 1  | 0 | 1.650155  | 1.560023  | 4.226450  |
| 106 | 1  | 0 | 1.160756  | -0.706109 | 4.426041  |
| 107 | 1  | 0 | 2.724506  | -0.859389 | 3.654890  |
| 108 | 1  | 0 | 0.545141  | 0.019415  | -0.913591 |

---

**TS3**

---

| Center<br>Number | Atomic<br>Number | Atomic<br>Type | Coordinates (Angstroms) |           |           |
|------------------|------------------|----------------|-------------------------|-----------|-----------|
|                  |                  |                | X                       | Y         | Z         |
| 1                | 5                | 0              | -1.919274               | -0.565429 | -0.831834 |
| 2                | 8                | 0              | -2.942327               | 0.325712  | -1.109771 |
| 3                | 8                | 0              | -2.370171               | -1.625941 | -0.066315 |
| 4                | 6                | 0              | -4.123323               | -0.068961 | -0.371189 |
| 5                | 6                | 0              | -3.811757               | -1.559015 | 0.014470  |
| 6                | 6                | 0              | -4.349517               | -2.569019 | -0.990898 |
| 7                | 1                | 0              | -3.969228               | -3.564061 | -0.743618 |
| 8                | 1                | 0              | -5.443215               | -2.609687 | -0.987105 |
| 9                | 1                | 0              | -4.019356               | -2.331339 | -2.007381 |
| 10               | 6                | 0              | -4.217972               | -1.944312 | 1.423765  |
| 11               | 1                | 0              | -5.297727               | -1.833198 | 1.571108  |
| 12               | 1                | 0              | -3.960106               | -2.991155 | 1.612923  |
| 13               | 1                | 0              | -3.693670               | -1.328407 | 2.157658  |
| 14               | 6                | 0              | -5.322148               | 0.109167  | -1.286097 |
| 15               | 1                | 0              | -6.244025               | -0.221870 | -0.795505 |
| 16               | 1                | 0              | -5.437609               | 1.167580  | -1.536405 |
| 17               | 1                | 0              | -5.212434               | -0.446278 | -2.220678 |
| 18               | 6                | 0              | -4.244577               | 0.860110  | 0.827308  |
| 19               | 1                | 0              | -4.310711               | 1.892643  | 0.474029  |
| 20               | 1                | 0              | -5.142105               | 0.636701  | 1.414020  |
| 21               | 1                | 0              | -3.364213               | 0.787433  | 1.468145  |
| 22               | 5                | 0              | 0.384899                | -1.949573 | -0.108616 |
| 23               | 8                | 0              | 0.503685                | -2.153185 | 1.257265  |
| 24               | 8                | 0              | 0.362452                | -3.157631 | -0.785422 |
| 25               | 6                | 0              | 0.257195                | -4.242223 | 0.158661  |
| 26               | 6                | 0              | 0.658986                | -3.574364 | 1.522853  |
| 27               | 6                | 0              | 1.186638                | -5.354996 | -0.290669 |
| 28               | 1                | 0              | 1.184459                | -6.182201 | 0.427503  |
| 29               | 1                | 0              | 0.850913                | -5.747599 | -1.254027 |
| 30               | 1                | 0              | 2.212898                | -5.002350 | -0.411184 |
| 31               | 6                | 0              | -1.188244               | -4.722046 | 0.114144  |
| 32               | 1                | 0              | -1.428047               | -5.019302 | -0.911248 |
| 33               | 1                | 0              | -1.353095               | -5.586265 | 0.765298  |
| 34               | 1                | 0              | -1.871532               | -3.918939 | 0.396881  |
| 35               | 6                | 0              | -0.257131               | -3.942132 | 2.677477  |

---

|    |    |   |           |           |           |
|----|----|---|-----------|-----------|-----------|
| 36 | 1  | 0 | -0.286891 | -5.027301 | 2.822514  |
| 37 | 1  | 0 | 0.110026  | -3.500048 | 3.609268  |
| 38 | 1  | 0 | -1.275608 | -3.583997 | 2.504396  |
| 39 | 6  | 0 | 2.109581  | -3.805318 | 1.921268  |
| 40 | 1  | 0 | 2.348312  | -3.201092 | 2.802604  |
| 41 | 1  | 0 | 2.292668  | -4.853546 | 2.177183  |
| 42 | 1  | 0 | 2.801200  | -3.519754 | 1.125719  |
| 43 | 5  | 0 | 2.331283  | 0.069465  | -0.714492 |
| 44 | 5  | 0 | 3.428763  | -1.359140 | -0.577352 |
| 45 | 5  | 0 | 3.723355  | -0.197279 | -1.841029 |
| 46 | 5  | 0 | 3.455282  | 1.398321  | -1.169338 |
| 47 | 6  | 0 | 3.087385  | 1.115979  | 0.423845  |
| 48 | 6  | 0 | 3.070313  | -0.445884 | 0.760920  |
| 49 | 5  | 0 | 5.091026  | -0.924321 | -0.974541 |
| 50 | 5  | 0 | 4.613156  | -1.112416 | 0.705538  |
| 51 | 1  | 0 | 2.930975  | -2.424749 | -0.705382 |
| 52 | 5  | 0 | 5.107719  | 0.797098  | -1.347011 |
| 53 | 1  | 0 | 3.519475  | -0.466465 | -2.977413 |
| 54 | 5  | 0 | 4.640919  | 1.667895  | 0.106128  |
| 55 | 1  | 0 | 2.996727  | 2.351236  | -1.702152 |
| 56 | 5  | 0 | 4.334166  | 0.487689  | 1.374148  |
| 57 | 1  | 0 | 2.346468  | -0.770243 | 1.501643  |
| 58 | 5  | 0 | 5.656055  | 0.232487  | 0.245130  |
| 59 | 1  | 0 | 5.814436  | -1.706723 | -1.494133 |
| 60 | 1  | 0 | 4.857733  | -1.992127 | 1.459652  |
| 61 | 1  | 0 | 5.848741  | 1.280939  | -2.136079 |
| 62 | 1  | 0 | 4.908404  | 2.773192  | 0.435425  |
| 63 | 1  | 0 | 4.320521  | 0.740424  | 2.529102  |
| 64 | 1  | 0 | 6.779522  | 0.301860  | 0.614710  |
| 65 | 77 | 0 | 0.167269  | -0.168946 | -1.140066 |
| 66 | 6  | 0 | -0.906180 | 1.506859  | -2.732169 |
| 67 | 6  | 0 | -1.022200 | -1.304150 | -2.626339 |
| 68 | 6  | 0 | 0.419471  | -1.218353 | -2.914746 |
| 69 | 6  | 0 | 0.447464  | 1.665393  | -2.844030 |
| 70 | 6  | 0 | -1.752920 | 0.837455  | -3.787284 |
| 71 | 1  | 0 | -1.450907 | 2.053122  | -1.972895 |
| 72 | 6  | 0 | -1.993714 | -0.667378 | -3.597483 |
| 73 | 1  | 0 | -1.322122 | -2.292200 | -2.272973 |
| 74 | 6  | 0 | 0.939906  | -0.469089 | -4.136539 |
| 75 | 1  | 0 | 0.973434  | -2.131570 | -2.704659 |
| 76 | 6  | 0 | 1.246636  | 1.025844  | -3.938491 |

|     |   |   |           |           |           |
|-----|---|---|-----------|-----------|-----------|
| 77  | 1 | 0 | 0.955282  | 2.377385  | -2.200002 |
| 78  | 1 | 0 | -2.718181 | 1.353650  | -3.814142 |
| 79  | 1 | 0 | -1.282524 | 1.016304  | -4.762204 |
| 80  | 1 | 0 | -3.018867 | -0.836036 | -3.257073 |
| 81  | 1 | 0 | -1.904337 | -1.193163 | -4.560060 |
| 82  | 1 | 0 | 1.854181  | -0.964395 | -4.476748 |
| 83  | 1 | 0 | 0.215162  | -0.601058 | -4.952279 |
| 84  | 1 | 0 | 1.079947  | 1.564165  | -4.883737 |
| 85  | 1 | 0 | 2.306978  | 1.150982  | -3.707607 |
| 86  | 5 | 0 | -0.319537 | 1.951040  | 0.310805  |
| 87  | 5 | 0 | -0.188214 | 0.715834  | 1.575392  |
| 88  | 8 | 0 | 0.717920  | 2.823282  | 0.045624  |
| 89  | 8 | 0 | -1.518738 | 2.622058  | 0.448334  |
| 90  | 8 | 0 | -1.260076 | 0.151209  | 2.207945  |
| 91  | 6 | 0 | -1.288611 | 4.047787  | 0.247506  |
| 92  | 6 | 0 | 0.268337  | 4.164444  | 0.373113  |
| 93  | 8 | 0 | 0.844576  | 1.022043  | 2.433870  |
| 94  | 6 | 0 | -1.078639 | 0.384483  | 3.634412  |
| 95  | 6 | 0 | 0.468913  | 0.581024  | 3.775030  |
| 96  | 6 | 0 | 0.927325  | 5.137638  | -0.582613 |
| 97  | 1 | 0 | 0.578137  | 6.159199  | -0.399489 |
| 98  | 1 | 0 | 2.010800  | 5.118538  | -0.437263 |
| 99  | 1 | 0 | 0.727333  | 4.885663  | -1.625958 |
| 100 | 6 | 0 | 0.736455  | 4.424138  | 1.798727  |
| 101 | 1 | 0 | 1.822224  | 4.301931  | 1.849974  |
| 102 | 1 | 0 | 0.486628  | 5.436161  | 2.130649  |
| 103 | 1 | 0 | 0.292013  | 3.706838  | 2.495480  |
| 104 | 6 | 0 | -2.070494 | 4.787986  | 1.317314  |
| 105 | 1 | 0 | -1.881092 | 5.865041  | 1.260087  |
| 106 | 1 | 0 | -3.141965 | 4.626981  | 1.170551  |
| 107 | 1 | 0 | -1.815384 | 4.448061  | 2.322918  |
| 108 | 6 | 0 | -1.822338 | 4.436466  | -1.122868 |
| 109 | 1 | 0 | -2.844862 | 4.062153  | -1.231603 |
| 110 | 1 | 0 | -1.842004 | 5.525129  | -1.233326 |
| 111 | 1 | 0 | -1.223427 | 4.028063  | -1.938064 |
| 112 | 1 | 0 | 2.391545  | 1.732673  | 0.975165  |
| 113 | 6 | 0 | 1.228866  | -0.701916 | 4.058854  |
| 114 | 1 | 0 | 2.304422  | -0.512865 | 3.982248  |
| 115 | 1 | 0 | 1.022744  | -1.069571 | 5.069045  |
| 116 | 1 | 0 | 0.960643  | -1.471469 | 3.334947  |
| 117 | 6 | 0 | 0.890211  | 1.662507  | 4.750849  |

|     |   |   |           |           |          |
|-----|---|---|-----------|-----------|----------|
| 118 | 1 | 0 | 1.977932  | 1.771341  | 4.730165 |
| 119 | 1 | 0 | 0.449979  | 2.632906  | 4.513000 |
| 120 | 1 | 0 | 0.598389  | 1.394339  | 5.771722 |
| 121 | 6 | 0 | -1.634898 | -0.798275 | 4.397112 |
| 122 | 1 | 0 | -1.208076 | -1.736807 | 4.040483 |
| 123 | 1 | 0 | -1.426256 | -0.700509 | 5.467836 |
| 124 | 1 | 0 | -2.720208 | -0.849213 | 4.273002 |
| 125 | 6 | 0 | -1.869110 | 1.646778  | 3.950755 |
| 126 | 1 | 0 | -1.496453 | 2.498625  | 3.372160 |
| 127 | 1 | 0 | -2.916708 | 1.497276  | 3.675367 |
| 128 | 1 | 0 | -1.824052 | 1.899374  | 5.014244 |

---

### TS3u

| Center<br>Number | Atomic<br>Number | Atomic<br>Type | Coordinates (Angstroms) |           |           |
|------------------|------------------|----------------|-------------------------|-----------|-----------|
|                  |                  |                | X                       | Y         | Z         |
| 1                | 5                | 0              | 1.632223                | 1.063836  | -0.947043 |
| 2                | 8                | 0              | 2.852510                | 0.411683  | -1.075252 |
| 3                | 8                | 0              | 1.770404                | 2.251660  | -0.244229 |
| 4                | 6                | 0              | 3.875468                | 1.172718  | -0.387732 |
| 5                | 6                | 0              | 3.175690                | 2.559484  | -0.134350 |
| 6                | 6                | 0              | 3.475538                | 3.593879  | -1.212827 |
| 7                | 1                | 0              | 2.847872                | 4.475097  | -1.052992 |
| 8                | 1                | 0              | 4.522772                | 3.911681  | -1.198655 |
| 9                | 1                | 0              | 3.250598                | 3.204268  | -2.211189 |
| 10               | 6                | 0              | 3.419625                | 3.147136  | 1.242578  |
| 11               | 1                | 0              | 4.484658                | 3.341422  | 1.409135  |
| 12               | 1                | 0              | 2.886450                | 4.098129  | 1.339872  |
| 13               | 1                | 0              | 3.054485                | 2.472567  | 2.019808  |
| 14               | 6                | 0              | 5.088011                | 1.232677  | -1.302114 |
| 15               | 1                | 0              | 5.891906                | 1.825315  | -0.851985 |
| 16               | 1                | 0              | 5.469174                | 0.220127  | -1.464950 |
| 17               | 1                | 0              | 4.850902                | 1.662257  | -2.278389 |
| 18               | 6                | 0              | 4.239582                | 0.433085  | 0.889094  |
| 19               | 1                | 0              | 4.606030                | -0.565339 | 0.638104  |
| 20               | 1                | 0              | 5.026568                | 0.961804  | 1.437465  |
| 21               | 1                | 0              | 3.367942                | 0.309993  | 1.531564  |
| 22               | 5                | 0              | -0.988426               | 1.762662  | -0.243954 |
| 23               | 8                | 0              | -1.193751               | 2.024931  | 1.102294  |



|    |    |   |           |           |           |
|----|----|---|-----------|-----------|-----------|
| 24 | 8  | 0 | -1.284098 | 2.877880  | -1.012088 |
| 25 | 6  | 0 | -1.511481 | 4.013347  | -0.153667 |
| 26 | 6  | 0 | -1.748790 | 3.359772  | 1.255339  |
| 27 | 6  | 0 | -2.702216 | 4.785490  | -0.692169 |
| 28 | 1  | 0 | -2.949262 | 5.630792  | -0.040648 |
| 29 | 1  | 0 | -2.464827 | 5.184405  | -1.681878 |
| 30 | 1  | 0 | -3.586159 | 4.151838  | -0.788289 |
| 31 | 6  | 0 | -0.256439 | 4.874042  | -0.226603 |
| 32 | 1  | 0 | -0.081261 | 5.151231  | -1.270574 |
| 33 | 1  | 0 | -0.356322 | 5.794611  | 0.357073  |
| 34 | 1  | 0 | 0.615823  | 4.316681  | 0.119721  |
| 35 | 6  | 0 | -1.008967 | 4.057105  | 2.383462  |
| 36 | 1  | 0 | -1.293556 | 5.113119  | 2.442267  |
| 37 | 1  | 0 | -1.264939 | 3.598419  | 3.344029  |
| 38 | 1  | 0 | 0.074130  | 3.993547  | 2.248110  |
| 39 | 6  | 0 | -3.215593 | 3.200818  | 1.629202  |
| 40 | 1  | 0 | -3.294525 | 2.613905  | 2.550279  |
| 41 | 1  | 0 | -3.690044 | 4.170291  | 1.810332  |
| 42 | 1  | 0 | -3.781254 | 2.679220  | 0.854725  |
| 43 | 5  | 0 | -2.200789 | -0.819552 | -0.605938 |
| 44 | 5  | 0 | -3.687326 | 0.199631  | -0.536409 |
| 45 | 5  | 0 | -5.129112 | -0.755538 | -0.869518 |
| 46 | 5  | 0 | -4.728954 | -0.321776 | 0.786078  |
| 47 | 1  | 0 | -3.544092 | 1.354808  | -0.744756 |
| 48 | 5  | 0 | -4.608876 | -2.416057 | -1.138986 |
| 49 | 1  | 0 | -3.491914 | -0.823655 | -2.876734 |
| 50 | 5  | 0 | -3.890195 | -3.004987 | 0.353184  |
| 51 | 1  | 0 | -2.127047 | -3.262694 | -1.445534 |
| 52 | 5  | 0 | -3.959955 | -1.710032 | 1.541642  |
| 53 | 1  | 0 | -2.466480 | 0.113210  | 1.544977  |
| 54 | 5  | 0 | -5.300536 | -1.950387 | 0.430154  |
| 55 | 1  | 0 | -6.062070 | -0.272298 | -1.418307 |
| 56 | 1  | 0 | -5.232061 | 0.483088  | 1.494028  |
| 57 | 1  | 0 | -5.163518 | -3.156606 | -1.880322 |
| 58 | 1  | 0 | -3.801728 | -4.115495 | 0.752520  |
| 59 | 1  | 0 | -3.865818 | -1.871661 | 2.708963  |
| 60 | 1  | 0 | -6.344598 | -2.343858 | 0.828035  |
| 61 | 77 | 0 | -0.271002 | 0.050370  | -1.128767 |
| 62 | 6  | 0 | 1.294708  | -1.463773 | -2.655554 |
| 63 | 6  | 0 | 0.739914  | 1.325187  | -2.664617 |
| 64 | 6  | 0 | -0.656392 | 0.890970  | -2.962229 |

|     |   |   |           |           |           |
|-----|---|---|-----------|-----------|-----------|
| 65  | 6 | 0 | 0.024949  | -1.925380 | -2.787835 |
| 66  | 6 | 0 | 2.002309  | -0.648614 | -3.706092 |
| 67  | 1 | 0 | 1.894390  | -1.820252 | -1.824660 |
| 68  | 6 | 0 | 1.831883  | 0.880149  | -3.622671 |
| 69  | 1 | 0 | 0.762579  | 2.398005  | -2.455167 |
| 70  | 6 | 0 | -0.966314 | -0.016467 | -4.149187 |
| 71  | 1 | 0 | -1.386333 | 1.692015  | -2.862380 |
| 72  | 6 | 0 | -0.877992 | -1.536648 | -3.915647 |
| 73  | 1 | 0 | -0.334243 | -2.667627 | -2.084527 |
| 74  | 1 | 0 | 3.069302  | -0.889244 | -3.656117 |
| 75  | 1 | 0 | 1.653516  | -0.997043 | -4.687071 |
| 76  | 1 | 0 | 2.781047  | 1.337164  | -3.329519 |
| 77  | 1 | 0 | 1.595314  | 1.287012  | -4.616460 |
| 78  | 1 | 0 | -1.978164 | 0.215167  | -4.495566 |
| 79  | 1 | 0 | -0.302174 | 0.273770  | -4.976535 |
| 80  | 1 | 0 | -0.549684 | -2.029948 | -4.842404 |
| 81  | 1 | 0 | -1.875430 | -1.930667 | -3.706133 |
| 82  | 5 | 0 | 0.988101  | -1.731383 | 0.565733  |
| 83  | 5 | 0 | 0.393528  | -0.504459 | 1.641988  |
| 84  | 8 | 0 | 0.313780  | -2.831561 | 0.097743  |
| 85  | 8 | 0 | 2.290549  | -2.019687 | 0.901842  |
| 86  | 8 | 0 | 1.182185  | 0.455954  | 2.218101  |
| 87  | 6 | 0 | 2.549431  | -3.430489 | 0.675367  |
| 88  | 6 | 0 | 1.120657  | -4.015476 | 0.350805  |
| 89  | 8 | 0 | -0.508009 | -1.052786 | 2.533992  |
| 90  | 6 | 0 | 1.053255  | 0.303529  | 3.660674  |
| 91  | 6 | 0 | -0.337810 | -0.395818 | 3.826788  |
| 92  | 6 | 0 | 1.064898  | -4.899459 | -0.879158 |
| 93  | 1 | 0 | 1.670022  | -5.801019 | -0.738582 |
| 94  | 1 | 0 | 0.032991  | -5.210533 | -1.063164 |
| 95  | 1 | 0 | 1.422252  | -4.377259 | -1.770002 |
| 96  | 6 | 0 | 0.448464  | -4.702488 | 1.531291  |
| 97  | 1 | 0 | -0.574123 | -4.971258 | 1.250850  |
| 98  | 1 | 0 | 0.973242  | -5.614322 | 1.830865  |
| 99  | 1 | 0 | 0.388518  | -4.032446 | 2.395009  |
| 100 | 6 | 0 | 3.178935  | -3.978536 | 1.945616  |
| 101 | 1 | 0 | 3.404699  | -5.044916 | 1.843212  |
| 102 | 1 | 0 | 4.116554  | -3.450903 | 2.142475  |
| 103 | 1 | 0 | 2.531760  | -3.848534 | 2.815633  |
| 104 | 6 | 0 | 3.560123  | -3.538620 | -0.458064 |
| 105 | 1 | 0 | 4.468488  | -2.996988 | -0.181729 |

|     |   |   |           |           |           |
|-----|---|---|-----------|-----------|-----------|
| 106 | 1 | 0 | 3.830955  | -4.582644 | -0.642516 |
| 107 | 1 | 0 | 3.193772  | -3.116354 | -1.395116 |
| 108 | 1 | 0 | -1.724403 | -2.311626 | 1.172489  |
| 109 | 6 | 0 | -1.493245 | 0.573565  | 4.004030  |
| 110 | 1 | 0 | -2.441179 | 0.028426  | 3.949868  |
| 111 | 1 | 0 | -1.447131 | 1.070160  | 4.978454  |
| 112 | 1 | 0 | -1.480653 | 1.329570  | 3.217518  |
| 113 | 6 | 0 | -0.387176 | -1.472985 | 4.893053  |
| 114 | 1 | 0 | -1.377331 | -1.936620 | 4.901830  |
| 115 | 1 | 0 | 0.352496  | -2.257484 | 4.718671  |
| 116 | 1 | 0 | -0.207754 | -1.044610 | 5.884773  |
| 117 | 6 | 0 | 1.152120  | 1.665365  | 4.313256  |
| 118 | 1 | 0 | 0.428401  | 2.363941  | 3.893144  |
| 119 | 1 | 0 | 0.980246  | 1.587653  | 5.392284  |
| 120 | 1 | 0 | 2.152493  | 2.081608  | 4.165791  |
| 121 | 6 | 0 | 2.219590  | -0.576095 | 4.093113  |
| 122 | 1 | 0 | 2.196256  | -1.543917 | 3.583684  |
| 123 | 1 | 0 | 3.159474  | -0.086438 | 3.823206  |
| 124 | 1 | 0 | 2.219927  | -0.744256 | 5.174184  |
| 125 | 6 | 0 | -3.603652 | -1.073763 | -1.723134 |
| 126 | 5 | 0 | -2.581747 | -1.980695 | 0.601436  |
| 127 | 5 | 0 | -3.055926 | -0.469426 | 0.845326  |
| 128 | 6 | 0 | -2.852307 | -2.462045 | -0.962474 |

---

### TS3e

| Center<br>Number | Atomic<br>Number | Atomic<br>Type | Coordinates (Angstroms) |           |           |
|------------------|------------------|----------------|-------------------------|-----------|-----------|
|                  |                  |                | X                       | Y         | Z         |
| 1                | 5                | 0              | 1.933966                | 0.025275  | 0.114027  |
| 2                | 8                | 0              | 2.523426                | -0.371699 | 1.329052  |
| 3                | 8                | 0              | 2.797899                | 0.916718  | -0.527507 |
| 4                | 6                | 0              | 3.673486                | 0.456895  | 1.588361  |
| 5                | 6                | 0              | 4.071891                | 0.912452  | 0.156473  |
| 6                | 6                | 0              | 4.956542                | -0.104586 | -0.553833 |
| 7                | 1                | 0              | 5.057514                | 0.174225  | -1.606414 |
| 8                | 1                | 0              | 5.958550                | -0.151356 | -0.116015 |
| 9                | 1                | 0              | 4.511876                | -1.104922 | -0.507564 |
| 10               | 6                | 0              | 4.679409                | 2.297702  | 0.062834  |
| 11               | 1                | 0              | 5.635810                | 2.343274  | 0.595323  |

|    |   |   |           |           |           |
|----|---|---|-----------|-----------|-----------|
| 12 | 1 | 0 | 4.865672  | 2.553914  | -0.984119 |
| 13 | 1 | 0 | 4.019680  | 3.060933  | 0.482563  |
| 14 | 6 | 0 | 4.716204  | -0.374283 | 2.310668  |
| 15 | 1 | 0 | 5.631933  | 0.203178  | 2.480168  |
| 16 | 1 | 0 | 4.330249  | -0.683715 | 3.285945  |
| 17 | 1 | 0 | 4.974114  | -1.275893 | 1.751926  |
| 18 | 6 | 0 | 3.206841  | 1.603886  | 2.476509  |
| 19 | 1 | 0 | 2.807591  | 1.193820  | 3.409157  |
| 20 | 1 | 0 | 4.021041  | 2.291071  | 2.728485  |
| 21 | 1 | 0 | 2.406799  | 2.171384  | 1.991362  |
| 22 | 5 | 0 | -0.848272 | 1.322287  | -0.335608 |
| 23 | 8 | 0 | -0.395009 | 2.218289  | 0.646299  |
| 24 | 8 | 0 | -0.818614 | 1.918111  | -1.592316 |
| 25 | 6 | 0 | -0.220669 | 3.225994  | -1.514618 |
| 26 | 6 | 0 | -0.223694 | 3.525437  | 0.030629  |
| 27 | 6 | 0 | -1.074155 | 4.178297  | -2.340591 |
| 28 | 1 | 0 | -0.695524 | 5.204046  | -2.270791 |
| 29 | 1 | 0 | -1.032727 | 3.878340  | -3.390544 |
| 30 | 1 | 0 | -2.122217 | 4.172083  | -2.037103 |
| 31 | 6 | 0 | 1.163328  | 3.153418  | -2.142303 |
| 32 | 1 | 0 | 1.056865  | 2.787059  | -3.167612 |
| 33 | 1 | 0 | 1.628625  | 4.144143  | -2.189053 |
| 34 | 1 | 0 | 1.829260  | 2.476269  | -1.606863 |
| 35 | 6 | 0 | 1.067443  | 4.132304  | 0.541212  |
| 36 | 1 | 0 | 1.250651  | 5.105157  | 0.073066  |
| 37 | 1 | 0 | 1.016415  | 4.282909  | 1.623807  |
| 38 | 1 | 0 | 1.914891  | 3.479960  | 0.319449  |
| 39 | 6 | 0 | -1.408777 | 4.373770  | 0.476745  |
| 40 | 1 | 0 | -1.453787 | 4.388751  | 1.570053  |
| 41 | 1 | 0 | -1.321481 | 5.407701  | 0.129405  |
| 42 | 1 | 0 | -2.355859 | 3.980984  | 0.093410  |
| 43 | 5 | 0 | -2.309767 | 0.394515  | -0.032651 |
| 44 | 5 | 0 | -3.698313 | 1.268970  | -0.770514 |
| 45 | 5 | 0 | -3.493279 | -0.453568 | -1.051175 |
| 46 | 5 | 0 | -2.964704 | -1.195572 | 0.460527  |
| 47 | 6 | 0 | -2.927516 | 0.096960  | 1.531842  |
| 48 | 6 | 0 | -3.355054 | 1.469124  | 0.849012  |
| 49 | 5 | 0 | -5.116563 | 0.218669  | -0.774396 |
| 50 | 5 | 0 | -4.978586 | 1.498106  | 0.426972  |
| 51 | 1 | 0 | -3.451013 | 2.153082  | -1.511997 |
| 52 | 5 | 0 | -4.660194 | -1.299472 | -0.010078 |

|    |    |   |           |           |           |
|----|----|---|-----------|-----------|-----------|
| 53 | 1  | 0 | -3.160249 | -0.851400 | -2.116033 |
| 54 | 5  | 0 | -4.229194 | -0.950535 | 1.665063  |
| 55 | 1  | 0 | -2.230881 | -2.090607 | 0.657992  |
| 56 | 5  | 0 | -4.437795 | 0.772638  | 1.931663  |
| 57 | 1  | 0 | -2.205095 | 0.171640  | 2.336986  |
| 58 | 1  | 0 | -2.835396 | 2.344581  | 1.223189  |
| 59 | 5  | 0 | -5.573983 | -0.091291 | 0.909712  |
| 60 | 1  | 0 | -5.916736 | 0.284347  | -1.644730 |
| 61 | 1  | 0 | -5.538870 | 2.537225  | 0.482837  |
| 62 | 1  | 0 | -5.124482 | -2.348682 | -0.305280 |
| 63 | 1  | 0 | -4.270367 | -1.663377 | 2.607351  |
| 64 | 1  | 0 | -4.544725 | 1.258088  | 3.001076  |
| 65 | 1  | 0 | -6.688677 | -0.256143 | 1.271295  |
| 66 | 77 | 0 | 0.270244  | -1.081946 | -0.554373 |
| 67 | 6  | 0 | 0.989608  | -3.020357 | -1.025850 |
| 68 | 6  | 0 | 1.170707  | -0.567995 | -2.440594 |
| 69 | 6  | 0 | -0.201401 | -0.844318 | -2.650256 |
| 70 | 6  | 0 | -0.430823 | -3.147987 | -1.140541 |
| 71 | 6  | 0 | 2.009929  | -2.983095 | -2.160462 |
| 72 | 1  | 0 | 1.403523  | -3.450938 | -0.108210 |
| 73 | 6  | 0 | 2.210364  | -1.596046 | -2.821556 |
| 74 | 1  | 0 | 1.509178  | 0.463235  | -2.444341 |
| 75 | 6  | 0 | -0.638997 | -2.102097 | -3.379373 |
| 76 | 1  | 0 | -0.882236 | 0.002209  | -2.709925 |
| 77 | 6  | 0 | -1.218220 | -3.127952 | -2.419942 |
| 78 | 1  | 0 | -0.939356 | -3.673167 | -0.330353 |
| 79 | 1  | 0 | 2.971035  | -3.304768 | -1.744996 |
| 80 | 1  | 0 | 1.750032  | -3.739678 | -2.913357 |
| 81 | 1  | 0 | 3.196833  | -1.197890 | -2.564954 |
| 82 | 1  | 0 | 2.212478  | -1.709470 | -3.916466 |
| 83 | 1  | 0 | -1.366747 | -1.838200 | -4.155062 |
| 84 | 1  | 0 | 0.219292  | -2.531476 | -3.910120 |
| 85 | 1  | 0 | -1.272639 | -4.123393 | -2.891511 |
| 86 | 1  | 0 | -2.252557 | -2.857965 | -2.171276 |
| 87 | 7  | 0 | 0.065828  | -1.510275 | 1.590242  |
| 88 | 6  | 0 | -0.049349 | -2.756866 | 2.082392  |
| 89 | 6  | 0 | 0.087028  | -0.493811 | 2.479194  |
| 90 | 6  | 0 | -0.155491 | -3.033250 | 3.437879  |
| 91 | 1  | 0 | -0.065013 | -3.560323 | 1.355181  |
| 92 | 6  | 0 | -0.029110 | -0.687704 | 3.847900  |
| 93 | 6  | 0 | -0.148280 | -1.980878 | 4.345370  |

|     |   |   |           |           |          |
|-----|---|---|-----------|-----------|----------|
| 94  | 1 | 0 | -0.246547 | -4.063433 | 3.764280 |
| 95  | 1 | 0 | -0.013346 | 0.174311  | 4.507145 |
| 96  | 1 | 0 | -0.230725 | -2.163745 | 5.412484 |
| 97  | 6 | 0 | 0.239567  | 0.913862  | 1.873562 |
| 98  | 1 | 0 | -0.665127 | 1.465725  | 2.021465 |
| 99  | 1 | 0 | 1.049942  | 1.422392  | 2.352717 |
| 100 | 1 | 0 | 0.439872  | 0.831527  | 0.825707 |

---

## TS4

| Center<br>Number | Atomic<br>Number | Atomic<br>Type | Coordinates (Angstroms) |           |           |
|------------------|------------------|----------------|-------------------------|-----------|-----------|
|                  |                  |                | X                       | Y         | Z         |
| 1                | 5                | 0              | 1.883746                | 0.754350  | -0.232619 |
| 2                | 8                | 0              | 2.917783                | 1.248000  | -1.011263 |
| 3                | 8                | 0              | 2.202933                | 0.816552  | 1.110938  |
| 4                | 6                | 0              | 4.095994                | 1.347253  | -0.172741 |
| 5                | 6                | 0              | 3.483324                | 1.477599  | 1.257890  |
| 6                | 6                | 0              | 3.230836                | 2.922988  | 1.660188  |
| 7                | 1                | 0              | 2.618157                | 2.951041  | 2.565977  |
| 8                | 1                | 0              | 4.171055                | 3.445354  | 1.865796  |
| 9                | 1                | 0              | 2.685663                | 3.456099  | 0.880250  |
| 10               | 6                | 0              | 4.253331                | 0.755200  | 2.348044  |
| 11               | 1                | 0              | 5.276916                | 1.137431  | 2.429522  |
| 12               | 1                | 0              | 3.762501                | 0.910940  | 3.314406  |
| 13               | 1                | 0              | 4.291414                | -0.320592 | 2.160348  |
| 14               | 6                | 0              | 4.912974                | 2.536932  | -0.635462 |
| 15               | 1                | 0              | 5.781852                | 2.691630  | 0.013509  |
| 16               | 1                | 0              | 5.280913                | 2.360968  | -1.650393 |
| 17               | 1                | 0              | 4.321816                | 3.454974  | -0.646284 |
| 18               | 6                | 0              | 4.877650                | 0.055287  | -0.362275 |
| 19               | 1                | 0              | 5.136014                | -0.062747 | -1.419198 |
| 20               | 1                | 0              | 5.806913                | 0.051044  | 0.216463  |
| 21               | 1                | 0              | 4.265448                | -0.798374 | -0.059443 |
| 22               | 5                | 0              | -0.472266               | 1.870414  | -0.048473 |
| 23               | 8                | 0              | -1.756754               | 2.372459  | -0.199326 |
| 24               | 8                | 0              | 0.391879                | 2.867121  | 0.368470  |
| 25               | 6                | 0              | -0.301771               | 4.139565  | 0.293659  |
| 26               | 6                | 0              | -1.804964               | 3.716847  | 0.326901  |
| 27               | 6                | 0              | 0.104875                | 4.787015  | -1.022552 |

|    |    |   |           |           |           |
|----|----|---|-----------|-----------|-----------|
| 28 | 1  | 0 | -0.299518 | 5.799377  | -1.119433 |
| 29 | 1  | 0 | 1.196704  | 4.846256  | -1.072306 |
| 30 | 1  | 0 | -0.239225 | 4.199435  | -1.879089 |
| 31 | 6  | 0 | 0.139245  | 5.002655  | 1.459782  |
| 32 | 1  | 0 | 1.193972  | 5.271789  | 1.355509  |
| 33 | 1  | 0 | -0.440145 | 5.931680  | 1.494686  |
| 34 | 1  | 0 | 0.018392  | 4.483514  | 2.413110  |
| 35 | 6  | 0 | -2.376970 | 3.648054  | 1.734890  |
| 36 | 1  | 0 | -2.492266 | 4.644145  | 2.173275  |
| 37 | 1  | 0 | -3.366746 | 3.180277  | 1.702781  |
| 38 | 1  | 0 | -1.737360 | 3.047886  | 2.383647  |
| 39 | 6  | 0 | -2.725230 | 4.530617  | -0.563557 |
| 40 | 1  | 0 | -3.741526 | 4.130232  | -0.502183 |
| 41 | 1  | 0 | -2.755195 | 5.578697  | -0.246546 |
| 42 | 1  | 0 | -2.417645 | 4.493721  | -1.610660 |
| 43 | 5  | 0 | -2.276659 | -0.799308 | -0.271892 |
| 44 | 5  | 0 | -3.552514 | 0.061591  | -1.207263 |
| 45 | 5  | 0 | -3.179655 | -1.613229 | -1.602382 |
| 46 | 5  | 0 | -2.918567 | -2.472766 | -0.102287 |
| 47 | 6  | 0 | -3.215327 | -1.329671 | 1.067094  |
| 48 | 6  | 0 | -3.563449 | 0.100652  | 0.448514  |
| 49 | 5  | 0 | -4.860923 | -1.049409 | -1.622444 |
| 50 | 5  | 0 | -5.064524 | 0.093092  | -0.299738 |
| 51 | 1  | 0 | -3.277606 | 1.044444  | -1.792738 |
| 52 | 5  | 0 | -4.474491 | -2.622860 | -0.932893 |
| 53 | 1  | 0 | -2.640656 | -1.924887 | -2.606075 |
| 54 | 5  | 0 | -4.432065 | -2.449720 | 0.811718  |
| 55 | 1  | 0 | -2.134616 | -3.322775 | 0.128932  |
| 56 | 5  | 0 | -4.802275 | -0.772045 | 1.202368  |
| 57 | 1  | 0 | -3.192832 | 0.958730  | 0.999071  |
| 58 | 5  | 0 | -5.641610 | -1.565365 | -0.118242 |
| 59 | 1  | 0 | -5.455300 | -0.918449 | -2.639775 |
| 60 | 1  | 0 | -5.700718 | 1.089809  | -0.266495 |
| 61 | 1  | 0 | -4.793338 | -3.644532 | -1.441094 |
| 62 | 1  | 0 | -4.612729 | -3.261305 | 1.652655  |
| 63 | 1  | 0 | -6.796185 | -1.811775 | -0.027990 |
| 64 | 77 | 0 | 0.050391  | 0.012559  | -0.997908 |
| 65 | 6  | 0 | 1.301731  | -1.279533 | -2.583907 |
| 66 | 6  | 0 | 0.587896  | 1.469839  | -2.673416 |
| 67 | 6  | 0 | -0.789518 | 1.199192  | -2.786948 |
| 68 | 6  | 0 | -0.034767 | -1.524547 | -2.862226 |

|     |   |   |           |           |           |
|-----|---|---|-----------|-----------|-----------|
| 69  | 6 | 0 | 2.200861  | -0.391012 | -3.389649 |
| 70  | 1 | 0 | 1.822383  | -2.011362 | -1.980245 |
| 71  | 6 | 0 | 1.611102  | 0.988629  | -3.683400 |
| 72  | 1 | 0 | 0.876316  | 2.373289  | -2.142067 |
| 73  | 6 | 0 | -1.404742 | 0.360369  | -3.871900 |
| 74  | 1 | 0 | -1.470196 | 1.921454  | -2.343829 |
| 75  | 6 | 0 | -0.691181 | -0.968778 | -4.101857 |
| 76  | 1 | 0 | -0.493516 | -2.381434 | -2.377758 |
| 77  | 1 | 0 | 3.135409  | -0.269470 | -2.837807 |
| 78  | 1 | 0 | 2.456756  | -0.908169 | -4.328095 |
| 79  | 1 | 0 | 2.425357  | 1.717825  | -3.724278 |
| 80  | 1 | 0 | 1.137935  | 1.000585  | -4.674295 |
| 81  | 1 | 0 | -2.446709 | 0.165473  | -3.604997 |
| 82  | 1 | 0 | -1.444565 | 0.944423  | -4.805490 |
| 83  | 1 | 0 | 0.074154  | -0.864782 | -4.881564 |
| 84  | 1 | 0 | -1.406596 | -1.705482 | -4.481339 |
| 85  | 5 | 0 | 0.938797  | -1.730082 | -0.010601 |
| 86  | 5 | 0 | -0.684715 | -0.377743 | 0.994265  |
| 87  | 8 | 0 | 0.356021  | -2.938646 | -0.336039 |
| 88  | 8 | 0 | 2.205785  | -1.915145 | 0.527542  |
| 89  | 8 | 0 | -1.051067 | 0.695547  | 1.845230  |
| 90  | 6 | 0 | 2.544811  | -3.327456 | 0.455291  |
| 91  | 6 | 0 | 1.158694  | -4.016357 | 0.192494  |
| 92  | 8 | 0 | -0.411762 | -1.485587 | 1.836186  |
| 93  | 6 | 0 | -0.831200 | 0.397476  | 3.238210  |
| 94  | 6 | 0 | -0.297696 | -1.088895 | 3.220994  |
| 95  | 6 | 0 | 1.183842  | -5.119119 | -0.850577 |
| 96  | 1 | 0 | 1.826896  | -5.948180 | -0.536258 |
| 97  | 1 | 0 | 0.172657  | -5.510984 | -0.990083 |
| 98  | 1 | 0 | 1.536489  | -4.753784 | -1.818237 |
| 99  | 6 | 0 | 0.483774  | -4.521314 | 1.459238  |
| 100 | 1 | 0 | -0.545572 | -4.806923 | 1.227530  |
| 101 | 1 | 0 | 1.002868  | -5.394112 | 1.868333  |
| 102 | 1 | 0 | 0.445209  | -3.740890 | 2.219910  |
| 103 | 6 | 0 | 3.220652  | -3.731688 | 1.753760  |
| 104 | 1 | 0 | 3.493999  | -4.792113 | 1.729568  |
| 105 | 1 | 0 | 4.139820  | -3.153160 | 1.886808  |
| 106 | 1 | 0 | 2.589092  | -3.563921 | 2.625447  |
| 107 | 6 | 0 | 3.555116  | -3.521568 | -0.672340 |
| 108 | 1 | 0 | 4.450225  | -2.928086 | -0.468967 |
| 109 | 1 | 0 | 3.859295  | -4.570170 | -0.743674 |



|     |   |   |           |           |           |
|-----|---|---|-----------|-----------|-----------|
| 110 | 1 | 0 | 3.174852  | -3.223861 | -1.651785 |
| 111 | 1 | 0 | -2.675704 | -1.330766 | 2.003346  |
| 112 | 6 | 0 | -1.121110 | -2.062504 | 4.055234  |
| 113 | 1 | 0 | -0.729598 | -3.075247 | 3.928961  |
| 114 | 1 | 0 | -1.059042 | -1.810876 | 5.118956  |
| 115 | 1 | 0 | -2.178868 | -2.086251 | 3.780185  |
| 116 | 6 | 0 | 1.166802  | -1.218043 | 3.615335  |
| 117 | 1 | 0 | 1.449518  | -2.273462 | 3.594036  |
| 118 | 1 | 0 | 1.810968  | -0.681879 | 2.916355  |
| 119 | 1 | 0 | 1.341135  | -0.853033 | 4.632171  |
| 120 | 6 | 0 | -2.156073 | 0.586135  | 3.969748  |
| 121 | 1 | 0 | -2.956777 | -0.051272 | 3.584808  |
| 122 | 1 | 0 | -2.050256 | 0.376199  | 5.038805  |
| 123 | 1 | 0 | -2.485299 | 1.623648  | 3.866872  |
| 124 | 6 | 0 | 0.178209  | 1.407225  | 3.766700  |
| 125 | 1 | 0 | 1.090009  | 1.388261  | 3.167456  |
| 126 | 1 | 0 | -0.244569 | 2.415120  | 3.709149  |
| 127 | 1 | 0 | 0.423376  | 1.213419  | 4.815906  |
| 128 | 1 | 0 | -5.157990 | -0.402327 | 2.266427  |

---

### TS4u

| Center<br>Number | Atomic<br>Number | Atomic<br>Type | Coordinates (Angstroms) |           |           |
|------------------|------------------|----------------|-------------------------|-----------|-----------|
|                  |                  |                | X                       | Y         | Z         |
| 1                | 5                | 0              | 2.039170                | -0.222149 | -0.216508 |
| 2                | 8                | 0              | 3.168978                | -0.373823 | -1.010652 |
| 3                | 8                | 0              | 2.369723                | -0.256073 | 1.121818  |
| 4                | 6                | 0              | 4.233317                | -0.861594 | -0.155501 |
| 5                | 6                | 0              | 3.813526                | -0.304002 | 1.238087  |
| 6                | 6                | 0              | 4.319737                | 1.109973  | 1.479013  |
| 7                | 1                | 0              | 3.821503                | 1.534113  | 2.355257  |
| 8                | 1                | 0              | 5.399908                | 1.115957  | 1.658909  |
| 9                | 1                | 0              | 4.090777                | 1.756836  | 0.630074  |
| 10               | 6                | 0              | 4.157555                | -1.200858 | 2.412219  |
| 11               | 1                | 0              | 5.238567                | -1.368005 | 2.475569  |
| 12               | 1                | 0              | 3.837290                | -0.730935 | 3.347577  |
| 13               | 1                | 0              | 3.655633                | -2.169040 | 2.335097  |
| 14               | 6                | 0              | 5.552244                | -0.344471 | -0.690643 |
| 15               | 1                | 0              | 6.381064                | -0.633095 | -0.035187 |

|    |   |   |           |           |           |
|----|---|---|-----------|-----------|-----------|
| 16 | 1 | 0 | 5.744738  | -0.770523 | -1.679948 |
| 17 | 1 | 0 | 5.549952  | 0.743176  | -0.786137 |
| 18 | 6 | 0 | 4.182042  | -2.382090 | -0.213325 |
| 19 | 1 | 0 | 4.300834  | -2.714510 | -1.249517 |
| 20 | 1 | 0 | 4.979095  | -2.840080 | 0.381110  |
| 21 | 1 | 0 | 3.215685  | -2.738499 | 0.155618  |
| 22 | 5 | 0 | 0.510652  | 1.896518  | -0.110709 |
| 23 | 8 | 0 | -0.405354 | 2.914153  | -0.303366 |
| 24 | 8 | 0 | 1.745566  | 2.398804  | 0.267971  |
| 25 | 6 | 0 | 1.703897  | 3.842063  | 0.122642  |
| 26 | 6 | 0 | 0.172550  | 4.151631  | 0.175842  |
| 27 | 6 | 0 | 2.328868  | 4.171980  | -1.226148 |
| 28 | 1 | 0 | 2.426755  | 5.251943  | -1.374598 |
| 29 | 1 | 0 | 3.327002  | 3.726009  | -1.281265 |
| 30 | 1 | 0 | 1.732626  | 3.769758  | -2.051047 |
| 31 | 6 | 0 | 2.520033  | 4.463418  | 1.239380  |
| 32 | 1 | 0 | 3.577830  | 4.211971  | 1.119464  |
| 33 | 1 | 0 | 2.431600  | 5.555152  | 1.223301  |
| 34 | 1 | 0 | 2.198784  | 4.105216  | 2.219602  |
| 35 | 6 | 0 | -0.334383 | 4.406375  | 1.585538  |
| 36 | 1 | 0 | 0.000770  | 5.380557  | 1.956167  |
| 37 | 1 | 0 | -1.427278 | 4.390442  | 1.585384  |
| 38 | 1 | 0 | 0.007335  | 3.628966  | 2.268606  |
| 39 | 6 | 0 | -0.293124 | 5.262675  | -0.746777 |
| 40 | 1 | 0 | -1.378494 | 5.370280  | -0.665574 |
| 41 | 1 | 0 | 0.163235  | 6.219919  | -0.471822 |
| 42 | 1 | 0 | -0.055980 | 5.053923  | -1.792405 |
| 43 | 5 | 0 | -2.472242 | 0.514162  | 0.246572  |
| 44 | 5 | 0 | -3.079536 | 1.497149  | -1.105233 |
| 45 | 5 | 0 | -4.426363 | 0.651844  | -1.873206 |
| 46 | 5 | 0 | -4.736356 | 2.012215  | -0.795370 |
| 47 | 1 | 0 | -2.308043 | 2.057192  | -1.790475 |
| 48 | 5 | 0 | -4.731508 | -0.834756 | -0.974728 |
| 49 | 1 | 0 | -2.509194 | -0.815427 | -1.704387 |
| 50 | 5 | 0 | -5.213283 | -0.390934 | 0.653511  |
| 51 | 1 | 0 | -3.152826 | -1.701064 | 0.570020  |
| 52 | 5 | 0 | -5.216522 | 1.366241  | 0.766945  |
| 53 | 1 | 0 | -3.107845 | 2.888757  | 1.061547  |
| 54 | 5 | 0 | -5.761136 | 0.566398  | -0.722369 |
| 55 | 1 | 0 | -4.486615 | 0.606194  | -3.054891 |
| 56 | 1 | 0 | -5.132038 | 3.041529  | -1.228309 |

|    |    |   |           |           |           |
|----|----|---|-----------|-----------|-----------|
| 57 | 1  | 0 | -4.932084 | -1.884757 | -1.476754 |
| 58 | 1  | 0 | -5.828317 | -1.184109 | 1.277953  |
| 59 | 1  | 0 | -5.963059 | 1.926099  | 1.496834  |
| 60 | 1  | 0 | -6.887575 | 0.547546  | -1.086020 |
| 61 | 77 | 0 | 0.150431  | 0.034219  | -1.007132 |
| 62 | 6  | 0 | 0.660463  | -1.915619 | -2.683024 |
| 63 | 6  | 0 | 1.293458  | 0.938475  | -2.756472 |
| 64 | 6  | 0 | -0.050939 | 1.316137  | -2.897375 |
| 65 | 6  | 0 | -0.601162 | -1.563953 | -3.049785 |
| 66 | 6  | 0 | 1.903051  | -1.507259 | -3.409885 |
| 67 | 1  | 0 | 0.777148  | -2.673639 | -1.913866 |
| 68 | 6  | 0 | 2.022530  | -0.001714 | -3.696139 |
| 69 | 1  | 0 | 1.948615  | 1.640313  | -2.245060 |
| 70 | 6  | 0 | -1.015119 | 0.783407  | -3.925923 |
| 71 | 1  | 0 | -0.330318 | 2.290845  | -2.498820 |
| 72 | 6  | 0 | -0.901043 | -0.711516 | -4.248027 |
| 73 | 1  | 0 | -1.419482 | -2.068894 | -2.542371 |
| 74 | 1  | 0 | 2.764916  | -1.822968 | -2.821253 |
| 75 | 1  | 0 | 1.950873  | -2.062262 | -4.359071 |
| 76 | 1  | 0 | 3.084356  | 0.258952  | -3.675491 |
| 77 | 1  | 0 | 1.676119  | 0.215035  | -4.715095 |
| 78 | 1  | 0 | -2.032918 | 0.993566  | -3.579567 |
| 79 | 1  | 0 | -0.910041 | 1.366848  | -4.854430 |
| 80 | 1  | 0 | -0.127411 | -0.880370 | -5.005909 |
| 81 | 1  | 0 | -1.841219 | -1.043955 | -4.702135 |
| 82 | 5  | 0 | -0.069659 | -1.793105 | 0.155203  |
| 83 | 5  | 0 | -1.010550 | 0.177487  | 1.212884  |
| 84 | 8  | 0 | -1.212414 | -2.488102 | -0.249724 |
| 85 | 8  | 0 | 0.832925  | -2.650627 | 0.757400  |
| 86 | 8  | 0 | -0.489329 | 1.265330  | 1.929035  |
| 87 | 6  | 0 | 0.326694  | -4.009033 | 0.728256  |
| 88 | 6  | 0 | -1.161875 | -3.853667 | 0.232857  |
| 89 | 8  | 0 | -1.155196 | -0.921621 | 2.102886  |
| 90 | 6  | 0 | -0.381576 | 0.968500  | 3.333265  |
| 91 | 6  | 0 | -0.626782 | -0.586325 | 3.412075  |
| 92 | 6  | 0 | -1.538668 | -4.755925 | -0.929847 |
| 93 | 1  | 0 | -1.521839 | -5.810871 | -0.637121 |
| 94 | 1  | 0 | -2.554336 | -4.517088 | -1.260109 |
| 95 | 1  | 0 | -0.869128 | -4.624512 | -1.783863 |
| 96 | 6  | 0 | -2.201406 | -3.980807 | 1.338655  |
| 97 | 1  | 0 | -3.201883 | -3.842278 | 0.914743  |

|     |   |   |           |           |           |
|-----|---|---|-----------|-----------|-----------|
| 98  | 1 | 0 | -2.182311 | -4.970898 | 1.803743  |
| 99  | 1 | 0 | -2.047164 | -3.219040 | 2.107230  |
| 100 | 6 | 0 | 0.459349  | -4.613378 | 2.116190  |
| 101 | 1 | 0 | 0.195124  | -5.676245 | 2.098671  |
| 102 | 1 | 0 | 1.497208  | -4.528095 | 2.451439  |
| 103 | 1 | 0 | -0.175769 | -4.119908 | 2.851511  |
| 104 | 6 | 0 | 1.223434  | -4.808146 | -0.212753 |
| 105 | 1 | 0 | 2.241831  | -4.821948 | 0.185074  |
| 106 | 1 | 0 | 0.884298  | -5.844633 | -0.299970 |
| 107 | 1 | 0 | 1.269987  | -4.384923 | -1.218950 |
| 108 | 1 | 0 | -3.609039 | 0.212070  | 2.528134  |
| 109 | 6 | 0 | -1.671018 | -1.006334 | 4.435898  |
| 110 | 1 | 0 | -1.816828 | -2.089886 | 4.383305  |
| 111 | 1 | 0 | -1.336660 | -0.767638 | 5.451224  |
| 112 | 1 | 0 | -2.637736 | -0.527878 | 4.269136  |
| 113 | 6 | 0 | 0.646687  | -1.381171 | 3.654093  |
| 114 | 1 | 0 | 0.412125  | -2.445340 | 3.699359  |
| 115 | 1 | 0 | 1.371910  | -1.226493 | 2.856556  |
| 116 | 1 | 0 | 1.096199  | -1.104420 | 4.613320  |
| 117 | 6 | 0 | -1.442900 | 1.796860  | 4.049011  |
| 118 | 1 | 0 | -2.445733 | 1.582095  | 3.673632  |
| 119 | 1 | 0 | -1.429115 | 1.617574  | 5.128806  |
| 120 | 1 | 0 | -1.249544 | 2.859509  | 3.881942  |
| 121 | 6 | 0 | 1.001661  | 1.403723  | 3.793227  |
| 122 | 1 | 0 | 1.778339  | 0.924335  | 3.194749  |
| 123 | 1 | 0 | 1.102429  | 2.487602  | 3.676809  |
| 124 | 1 | 0 | 1.158661  | 1.170507  | 4.851793  |
| 125 | 5 | 0 | -3.856107 | 0.446858  | 1.398482  |
| 126 | 5 | 0 | -3.546533 | 1.930254  | 0.521230  |
| 127 | 6 | 0 | -3.617513 | -0.763889 | 0.288171  |
| 128 | 6 | 0 | -3.176228 | -0.181236 | -1.135319 |

---

## TS5

---

| Center<br>Number | Atomic<br>Number | Atomic<br>Type | Coordinates (Angstroms) |           |           |
|------------------|------------------|----------------|-------------------------|-----------|-----------|
|                  |                  |                | X                       | Y         | Z         |
| 1                | 5                | 0              | -0.659319               | 0.106350  | 1.556869  |
| 2                | 5                | 0              | -0.399855               | 2.296552  | -0.158266 |
| 3                | 5                | 0              | -2.333423               | -1.542517 | -0.000924 |

|    |   |   |           |           |           |
|----|---|---|-----------|-----------|-----------|
| 4  | 8 | 0 | -3.227283 | -2.269646 | -0.765338 |
| 5  | 8 | 0 | 0.817635  | 2.266910  | 0.534564  |
| 6  | 8 | 0 | -0.618027 | 3.567498  | -0.659837 |
| 7  | 8 | 0 | 0.593808  | -0.476064 | 1.669520  |
| 8  | 8 | 0 | -1.193213 | 0.419518  | 2.787599  |
| 9  | 8 | 0 | -1.828492 | -2.322866 | 1.034141  |
| 10 | 6 | 0 | 0.354335  | 4.473929  | -0.082980 |
| 11 | 6 | 0 | 1.519675  | 3.519493  | 0.310301  |
| 12 | 6 | 0 | -3.453697 | -3.558092 | -0.138786 |
| 13 | 6 | 0 | -2.241809 | -3.698940 | 0.842439  |
| 14 | 6 | 0 | -0.131643 | 0.280981  | 3.769982  |
| 15 | 6 | 0 | 0.860359  | -0.707376 | 3.073680  |
| 16 | 6 | 0 | 0.456116  | 1.670426  | 3.957957  |
| 17 | 1 | 0 | -0.334038 | 2.354808  | 4.280856  |
| 18 | 1 | 0 | 1.250454  | 1.683231  | 4.711106  |
| 19 | 1 | 0 | 0.858887  | 2.035295  | 3.010108  |
| 20 | 6 | 0 | 2.327481  | -0.415057 | 3.316815  |
| 21 | 1 | 0 | 2.572602  | -0.457580 | 4.383812  |
| 22 | 1 | 0 | 2.938849  | -1.160969 | 2.799559  |
| 23 | 1 | 0 | 2.606401  | 0.566281  | 2.924659  |
| 24 | 6 | 0 | 0.544376  | -2.168172 | 3.354304  |
| 25 | 1 | 0 | 1.149390  | -2.797789 | 2.693844  |
| 26 | 1 | 0 | 0.772402  | -2.441295 | 4.389518  |
| 27 | 1 | 0 | -0.507030 | -2.379460 | 3.147006  |
| 28 | 6 | 0 | -0.734738 | -0.232579 | 5.061054  |
| 29 | 1 | 0 | 0.045517  | -0.415828 | 5.807875  |
| 30 | 1 | 0 | -1.423778 | 0.509886  | 5.472089  |
| 31 | 1 | 0 | -1.289626 | -1.160047 | 4.906200  |
| 32 | 6 | 0 | -2.592211 | -4.294202 | 2.194780  |
| 33 | 1 | 0 | -3.014297 | -5.298736 | 2.081368  |
| 34 | 1 | 0 | -1.691602 | -4.382940 | 2.809304  |
| 35 | 1 | 0 | -3.311112 | -3.677434 | 2.738099  |
| 36 | 6 | 0 | -1.052772 | -4.446179 | 0.253697  |
| 37 | 1 | 0 | -0.198939 | -4.344548 | 0.930339  |
| 38 | 1 | 0 | -1.264380 | -5.513272 | 0.133392  |
| 39 | 1 | 0 | -0.761699 | -4.044294 | -0.719730 |
| 40 | 6 | 0 | -4.793993 | -3.474485 | 0.578543  |
| 41 | 1 | 0 | -5.566092 | -3.172452 | -0.135046 |
| 42 | 1 | 0 | -5.085017 | -4.437479 | 1.009752  |
| 43 | 1 | 0 | -4.770042 | -2.735511 | 1.385170  |
| 44 | 6 | 0 | -3.510501 | -4.611812 | -1.227603 |

|    |    |   |           |           |           |
|----|----|---|-----------|-----------|-----------|
| 45 | 1  | 0 | -3.612266 | -5.614347 | -0.797578 |
| 46 | 1  | 0 | -4.374766 | -4.434094 | -1.872989 |
| 47 | 1  | 0 | -2.616005 | -4.592301 | -1.853506 |
| 48 | 6  | 0 | 2.522485  | 3.280198  | -0.809158 |
| 49 | 1  | 0 | 3.141417  | 4.164328  | -0.992231 |
| 50 | 1  | 0 | 3.184910  | 2.453770  | -0.528086 |
| 51 | 1  | 0 | 2.026157  | 3.011763  | -1.745350 |
| 52 | 6  | 0 | 2.261653  | 3.907418  | 1.575136  |
| 53 | 1  | 0 | 3.010764  | 3.145048  | 1.812849  |
| 54 | 1  | 0 | 2.787305  | 4.858360  | 1.434493  |
| 55 | 1  | 0 | 1.598452  | 4.010564  | 2.435696  |
| 56 | 6  | 0 | -0.317988 | 5.115812  | 1.123515  |
| 57 | 1  | 0 | 0.320093  | 5.867899  | 1.598083  |
| 58 | 1  | 0 | -1.241234 | 5.605467  | 0.802125  |
| 59 | 1  | 0 | -0.578619 | 4.361260  | 1.873912  |
| 60 | 6  | 0 | 0.710671  | 5.520306  | -1.118765 |
| 61 | 1  | 0 | -0.164377 | 6.134672  | -1.347780 |
| 62 | 1  | 0 | 1.499538  | 6.184668  | -0.749232 |
| 63 | 1  | 0 | 1.051930  | 5.061464  | -2.048915 |
| 64 | 5  | 0 | -0.187067 | -0.266067 | -1.735186 |
| 65 | 5  | 0 | -0.162971 | -1.881541 | -2.505924 |
| 66 | 5  | 0 | 2.570324  | -1.206541 | -2.013599 |
| 67 | 5  | 0 | 2.365807  | 0.232316  | -3.022542 |
| 68 | 1  | 0 | 1.770124  | 0.581212  | -0.695197 |
| 69 | 5  | 0 | 1.502387  | -2.454182 | -2.664240 |
| 70 | 1  | 0 | 0.977654  | -1.817562 | -0.366606 |
| 71 | 5  | 0 | 0.655034  | -1.790624 | -4.061315 |
| 72 | 1  | 0 | -1.015278 | -2.634989 | -2.193115 |
| 73 | 5  | 0 | 1.195361  | -0.126565 | -4.285973 |
| 74 | 1  | 0 | -1.399291 | -0.188325 | -4.017512 |
| 75 | 1  | 0 | 0.468056  | 1.948424  | -2.790211 |
| 76 | 5  | 0 | 2.351247  | -1.369433 | -3.760332 |
| 77 | 1  | 0 | 3.249875  | 1.020860  | -3.026033 |
| 78 | 1  | 0 | 1.753154  | -3.583715 | -2.419117 |
| 79 | 1  | 0 | 0.324056  | -2.490320 | -4.957858 |
| 80 | 1  | 0 | 1.264216  | 0.393243  | -5.348119 |
| 81 | 1  | 0 | 3.247171  | -1.746697 | -4.435890 |
| 82 | 77 | 0 | -1.660499 | 0.515319  | -0.277429 |
| 83 | 6  | 0 | -2.655674 | 1.636701  | -2.046358 |
| 84 | 6  | 0 | -3.000583 | 1.991144  | 0.750078  |
| 85 | 6  | 0 | -3.552119 | 0.697295  | 0.930767  |

|     |   |   |           |           |           |
|-----|---|---|-----------|-----------|-----------|
| 86  | 6 | 0 | -3.323120 | 0.417995  | -1.883232 |
| 87  | 6 | 0 | -3.267911 | 2.950087  | -1.634997 |
| 88  | 1 | 0 | -1.878309 | 1.693985  | -2.804862 |
| 89  | 6 | 0 | -3.657768 | 3.022477  | -0.151530 |
| 90  | 1 | 0 | -2.446124 | 2.380873  | 1.601458  |
| 91  | 6 | 0 | -4.793433 | 0.231196  | 0.214074  |
| 92  | 1 | 0 | -3.360640 | 0.226198  | 1.892461  |
| 93  | 6 | 0 | -4.724980 | 0.366729  | -1.310831 |
| 94  | 1 | 0 | -3.024145 | -0.420340 | -2.505908 |
| 95  | 1 | 0 | -2.555999 | 3.743399  | -1.858927 |
| 96  | 1 | 0 | -4.152428 | 3.136146  | -2.264228 |
| 97  | 1 | 0 | -3.414315 | 4.018448  | 0.231286  |
| 98  | 1 | 0 | -4.746713 | 2.918568  | -0.038662 |
| 99  | 1 | 0 | -4.963337 | -0.816279 | 0.469630  |
| 100 | 1 | 0 | -5.660385 | 0.782490  | 0.611595  |
| 101 | 1 | 0 | -5.257856 | 1.273092  | -1.629570 |
| 102 | 1 | 0 | -5.256851 | -0.473180 | -1.767576 |
| 103 | 1 | 0 | -0.230557 | -0.159559 | -0.157177 |
| 104 | 6 | 0 | 1.014401  | -1.471829 | -1.398712 |
| 105 | 6 | 0 | 1.502374  | 0.046100  | -1.605444 |
| 106 | 5 | 0 | 0.700893  | 0.790175  | -2.863994 |
| 107 | 5 | 0 | -0.364740 | -0.451102 | -3.503537 |
| 108 | 5 | 0 | 3.924106  | -1.283941 | -1.029032 |
| 109 | 8 | 0 | 4.939017  | -2.200871 | -1.090621 |
| 110 | 8 | 0 | 4.153989  | -0.289323 | -0.097806 |
| 111 | 6 | 0 | 5.848066  | -1.902420 | 0.006953  |
| 112 | 6 | 0 | 5.557193  | -0.395906 | 0.274784  |
| 113 | 6 | 0 | 7.262049  | -2.209254 | -0.439672 |
| 114 | 1 | 0 | 7.983538  | -1.915549 | 0.330352  |
| 115 | 1 | 0 | 7.375419  | -3.282036 | -0.614539 |
| 116 | 1 | 0 | 7.513409  | -1.689933 | -1.365994 |
| 117 | 6 | 0 | 5.442132  | -2.798937 | 1.167258  |
| 118 | 1 | 0 | 5.459287  | -3.841485 | 0.841212  |
| 119 | 1 | 0 | 6.122725  | -2.692889 | 2.017537  |
| 120 | 1 | 0 | 4.427282  | -2.567865 | 1.507245  |
| 121 | 6 | 0 | 5.723138  | 0.048660  | 1.711983  |
| 122 | 1 | 0 | 6.768283  | -0.043766 | 2.025960  |
| 123 | 1 | 0 | 5.434877  | 1.099623  | 1.810023  |
| 124 | 1 | 0 | 5.104522  | -0.534000 | 2.396533  |
| 125 | 6 | 0 | 6.323198  | 0.527935  | -0.662416 |
| 126 | 1 | 0 | 5.923017  | 1.541833  | -0.579501 |

|     |   |   |          |          |           |
|-----|---|---|----------|----------|-----------|
| 127 | 1 | 0 | 7.389041 | 0.559498 | -0.417227 |
| 128 | 1 | 0 | 6.217801 | 0.209129 | -1.703676 |

---

### TS5u

| Center<br>Number | Atomic<br>Number | Atomic<br>Type | Coordinates (Angstroms) |           |           |
|------------------|------------------|----------------|-------------------------|-----------|-----------|
|                  |                  |                | X                       | Y         | Z         |
| 1                | 5                | 0              | -2.303190               | 1.066380  | 0.269198  |
| 2                | 5                | 0              | 0.206971                | 1.923636  | -0.359856 |
| 3                | 5                | 0              | -2.097959               | -1.710656 | -0.444773 |
| 4                | 8                | 0              | -2.021779               | -2.960692 | -1.036062 |
| 5                | 8                | 0              | -0.461232               | 3.139694  | -0.425119 |
| 6                | 8                | 0              | 1.538774                | 2.134541  | -0.018651 |
| 7                | 8                | 0              | -2.305593               | 1.498560  | 1.582609  |
| 8                | 8                | 0              | -3.459485               | 1.419347  | -0.392783 |
| 9                | 8                | 0              | -3.194383               | -1.628182 | 0.396786  |
| 10               | 6                | 0              | 1.793898                | 3.562625  | 0.059788  |
| 11               | 6                | 0              | 0.357808                | 4.146849  | 0.220600  |
| 12               | 6                | 0              | -3.233794               | -3.695402 | -0.717857 |
| 13               | 6                | 0              | -3.779588               | -2.947138 | 0.541051  |
| 14               | 6                | 0              | -4.215444               | 2.294882  | 0.485491  |
| 15               | 6                | 0              | -3.659255               | 1.919138  | 1.893759  |
| 16               | 6                | 0              | -3.881535               | 3.720625  | 0.072485  |
| 17               | 1                | 0              | -4.131951               | 3.856396  | -0.983387 |
| 18               | 1                | 0              | -4.444481               | 4.456319  | 0.655754  |
| 19               | 1                | 0              | -2.810532               | 3.911750  | 0.187522  |
| 20               | 6                | 0              | -3.602616               | 3.064781  | 2.883089  |
| 21               | 1                | 0              | -4.611721               | 3.419305  | 3.120155  |
| 22               | 1                | 0              | -3.137183               | 2.727874  | 3.813207  |
| 23               | 1                | 0              | -3.024124               | 3.908766  | 2.503533  |
| 24               | 6                | 0              | -4.361087               | 0.719099  | 2.514519  |
| 25               | 1                | 0              | -3.806752               | 0.401994  | 3.402242  |
| 26               | 1                | 0              | -5.385068               | 0.961817  | 2.816476  |
| 27               | 1                | 0              | -4.378303               | -0.120071 | 1.814922  |
| 28               | 6                | 0              | -5.689313               | 2.003743  | 0.291111  |
| 29               | 1                | 0              | -6.296762               | 2.576960  | 1.000066  |
| 30               | 1                | 0              | -5.998023               | 2.285795  | -0.719208 |
| 31               | 1                | 0              | -5.906165               | 0.942014  | 0.428188  |
| 32               | 6                | 0              | -5.289488               | -2.797237 | 0.583628  |



|    |   |   |           |           |           |
|----|---|---|-----------|-----------|-----------|
| 33 | 1 | 0 | -5.779710 | -3.776914 | 0.599527  |
| 34 | 1 | 0 | -5.585138 | -2.264483 | 1.492215  |
| 35 | 1 | 0 | -5.666920 | -2.235489 | -0.273526 |
| 36 | 6 | 0 | -3.280220 | -3.522677 | 1.857429  |
| 37 | 1 | 0 | -3.546236 | -2.841061 | 2.670193  |
| 38 | 1 | 0 | -3.730153 | -4.498655 | 2.065590  |
| 39 | 1 | 0 | -2.192984 | -3.633821 | 1.863031  |
| 40 | 6 | 0 | -4.154920 | -3.574700 | -1.924136 |
| 41 | 1 | 0 | -3.644110 | -3.962324 | -2.810485 |
| 42 | 1 | 0 | -5.079049 | -4.145182 | -1.788477 |
| 43 | 1 | 0 | -4.423488 | -2.530509 | -2.114734 |
| 44 | 6 | 0 | -2.865511 | -5.146605 | -0.482093 |
| 45 | 1 | 0 | -3.741836 | -5.726479 | -0.172103 |
| 46 | 1 | 0 | -2.480296 | -5.588909 | -1.404909 |
| 47 | 1 | 0 | -2.096164 | -5.246390 | 0.286031  |
| 48 | 6 | 0 | -0.093654 | 4.224293  | 1.671609  |
| 49 | 1 | 0 | 0.474444  | 4.971857  | 2.233783  |
| 50 | 1 | 0 | -1.149163 | 4.507022  | 1.701471  |
| 51 | 1 | 0 | -0.000627 | 3.255792  | 2.172010  |
| 52 | 6 | 0 | 0.127818  | 5.474746  | -0.473773 |
| 53 | 1 | 0 | -0.906524 | 5.796999  | -0.324703 |
| 54 | 1 | 0 | 0.782127  | 6.250515  | -0.061136 |
| 55 | 1 | 0 | 0.305889  | 5.408218  | -1.548994 |
| 56 | 6 | 0 | 2.459850  | 3.974057  | -1.244575 |
| 57 | 1 | 0 | 2.745320  | 5.030587  | -1.236100 |
| 58 | 1 | 0 | 3.365687  | 3.379573  | -1.395896 |
| 59 | 1 | 0 | 1.795393  | 3.807558  | -2.098071 |
| 60 | 6 | 0 | 2.719983  | 3.810819  | 1.233948  |
| 61 | 1 | 0 | 3.700548  | 3.365968  | 1.039256  |
| 62 | 1 | 0 | 2.868232  | 4.883596  | 1.398598  |
| 63 | 1 | 0 | 2.327432  | 3.369564  | 2.152860  |
| 64 | 5 | 0 | 0.308648  | -0.880057 | 1.062961  |
| 65 | 5 | 0 | 0.763544  | -0.023800 | 2.574799  |
| 66 | 5 | 0 | -0.230999 | -1.471953 | 2.668083  |
| 67 | 5 | 0 | 0.389109  | -2.613288 | 1.484578  |
| 68 | 6 | 0 | 1.702064  | -1.846540 | 0.816661  |
| 69 | 6 | 0 | 1.907206  | -0.384904 | 1.425739  |
| 70 | 5 | 0 | 1.048194  | -1.189928 | 3.863777  |
| 71 | 5 | 0 | 2.411135  | -0.444713 | 3.028999  |
| 72 | 1 | 0 | 0.396828  | 1.096727  | 2.665049  |
| 73 | 5 | 0 | 0.818712  | -2.801945 | 3.188515  |

|     |    |   |           |           |           |
|-----|----|---|-----------|-----------|-----------|
| 74  | 1  | 0 | -1.386301 | -1.407007 | 2.926320  |
| 75  | 5  | 0 | 2.038185  | -3.044204 | 1.941384  |
| 76  | 1  | 0 | -0.218204 | -3.361103 | 0.800182  |
| 77  | 5  | 0 | 3.036752  | -1.591074 | 1.844359  |
| 78  | 1  | 0 | 2.004235  | -1.979547 | -0.215749 |
| 79  | 1  | 0 | 2.274363  | 0.381061  | 0.748348  |
| 80  | 5  | 0 | 2.461158  | -2.163192 | 3.410038  |
| 81  | 1  | 0 | 0.800271  | -0.920248 | 4.990225  |
| 82  | 1  | 0 | 3.143644  | 0.406213  | 3.403544  |
| 83  | 1  | 0 | 0.401743  | -3.716679 | 3.816721  |
| 84  | 1  | 0 | 2.497157  | -4.058940 | 1.544523  |
| 85  | 1  | 0 | 3.231320  | -2.605624 | 4.192556  |
| 86  | 77 | 0 | -0.749653 | -0.012277 | -0.702134 |
| 87  | 6  | 0 | 1.132925  | -0.290967 | -1.977098 |
| 88  | 6  | 0 | -1.243383 | 1.156989  | -2.557997 |
| 89  | 6  | 0 | -2.058926 | 0.000406  | -2.554663 |
| 90  | 6  | 0 | 0.334001  | -1.436090 | -2.143795 |
| 91  | 6  | 0 | 1.254128  | 0.787946  | -3.023986 |
| 92  | 1  | 0 | 1.984989  | -0.333804 | -1.299495 |
| 93  | 6  | 0 | -0.091494 | 1.316553  | -3.536299 |
| 94  | 1  | 0 | -1.712934 | 2.073351  | -2.211362 |
| 95  | 6  | 0 | -1.827300 | -1.155807 | -3.490908 |
| 96  | 1  | 0 | -3.081007 | 0.138764  | -2.211231 |
| 97  | 6  | 0 | -0.402762 | -1.713412 | -3.439796 |
| 98  | 1  | 0 | 0.545884  | -2.316430 | -1.542243 |
| 99  | 1  | 0 | 1.820315  | 1.610897  | -2.575809 |
| 100 | 1  | 0 | 1.867408  | 0.423885  | -3.864357 |
| 101 | 1  | 0 | 0.009498  | 2.379387  | -3.783463 |
| 102 | 1  | 0 | -0.362523 | 0.821204  | -4.478291 |
| 103 | 1  | 0 | -2.530574 | -1.951075 | -3.242433 |
| 104 | 1  | 0 | -2.079366 | -0.834127 | -4.513931 |
| 105 | 1  | 0 | 0.193850  | -1.312409 | -4.269943 |
| 106 | 1  | 0 | -0.436910 | -2.796363 | -3.591605 |
| 107 | 1  | 0 | -0.945723 | -0.043180 | 0.897254  |
| 108 | 5  | 0 | 4.453121  | -1.359501 | 0.981309  |
| 109 | 8  | 0 | 5.716123  | -1.096460 | 1.431860  |
| 110 | 8  | 0 | 4.336732  | -1.229871 | -0.392060 |
| 111 | 6  | 0 | 6.564489  | -0.934310 | 0.257187  |
| 112 | 6  | 0 | 5.534185  | -0.541842 | -0.844045 |
| 113 | 6  | 0 | 7.221807  | -2.280970 | -0.001617 |
| 114 | 1  | 0 | 7.939199  | -2.226546 | -0.826085 |

|     |   |   |          |           |           |
|-----|---|---|----------|-----------|-----------|
| 115 | 1 | 0 | 7.755193 | -2.600287 | 0.896600  |
| 116 | 1 | 0 | 6.477105 | -3.045009 | -0.242190 |
| 117 | 6 | 0 | 7.604241 | 0.124057  | 0.559489  |
| 118 | 1 | 0 | 8.275520 | -0.224520 | 1.348109  |
| 119 | 1 | 0 | 8.209474 | 0.335942  | -0.328490 |
| 120 | 1 | 0 | 7.145560 | 1.055468  | 0.896507  |
| 121 | 6 | 0 | 5.189573 | 0.942030  | -0.838364 |
| 122 | 1 | 0 | 6.007261 | 1.556984  | -1.226790 |
| 123 | 1 | 0 | 4.306303 | 1.105075  | -1.464159 |
| 124 | 1 | 0 | 4.949425 | 1.284122  | 0.174595  |
| 125 | 6 | 0 | 5.870451 | -1.011438 | -2.242749 |
| 126 | 1 | 0 | 5.076307 | -0.715796 | -2.934577 |
| 127 | 1 | 0 | 6.805375 | -0.559593 | -2.590734 |
| 128 | 1 | 0 | 5.972007 | -2.097039 | -2.290636 |

---

## TS6

| Center<br>Number | Atomic<br>Number | Atomic<br>Type | Coordinates (Angstroms) |           |           |
|------------------|------------------|----------------|-------------------------|-----------|-----------|
|                  |                  |                | X                       | Y         | Z         |
| 1                | 5                | 0              | -0.605041               | -0.351554 | 1.489346  |
| 2                | 5                | 0              | -0.636588               | 2.406860  | -0.003906 |
| 3                | 5                | 0              | -1.985614               | -1.681477 | -0.119987 |
| 4                | 8                | 0              | -3.012078               | -2.359628 | -0.742976 |
| 5                | 8                | 0              | 0.621151                | 2.464770  | 0.587003  |
| 6                | 8                | 0              | -1.070402               | 3.664703  | -0.351547 |
| 7                | 8                | 0              | 0.769197                | -0.450373 | 1.435075  |
| 8                | 8                | 0              | -1.101650               | -0.663822 | 2.740323  |
| 9                | 8                | 0              | -1.118427               | -2.576937 | 0.492558  |
| 10               | 6                | 0              | -0.176270               | 4.640084  | 0.253868  |
| 11               | 6                | 0              | 1.131461                | 3.820032  | 0.491052  |
| 12               | 6                | 0              | -2.956228               | -3.768142 | -0.421758 |
| 13               | 6                | 0              | -1.558689               | -3.944294 | 0.287431  |
| 14               | 6                | 0              | 0.033195                | -0.686386 | 3.645551  |
| 15               | 6                | 0              | 1.235848                | -0.992905 | 2.694358  |
| 16               | 6                | 0              | 0.108974                | 0.707270  | 4.256932  |
| 17               | 1                | 0              | -0.840429               | 0.935005  | 4.748818  |
| 18               | 1                | 0              | 0.909890                | 0.788704  | 4.998192  |
| 19               | 1                | 0              | 0.279547                | 1.461632  | 3.480272  |
| 20               | 6                | 0              | 2.529961                | -0.284482 | 3.039755  |

|    |   |   |           |           |           |
|----|---|---|-----------|-----------|-----------|
| 21 | 1 | 0 | 2.930511  | -0.636202 | 3.997267  |
| 22 | 1 | 0 | 3.264016  | -0.487961 | 2.255897  |
| 23 | 1 | 0 | 2.402724  | 0.799302  | 3.087840  |
| 24 | 6 | 0 | 1.486880  | -2.477484 | 2.483449  |
| 25 | 1 | 0 | 2.201232  | -2.604616 | 1.662108  |
| 26 | 1 | 0 | 1.908962  | -2.949003 | 3.376559  |
| 27 | 1 | 0 | 0.563739  | -2.989480 | 2.207098  |
| 28 | 6 | 0 | -0.213025 | -1.732819 | 4.711698  |
| 29 | 1 | 0 | 0.652657  | -1.819579 | 5.377194  |
| 30 | 1 | 0 | -1.077190 | -1.453580 | 5.320152  |
| 31 | 1 | 0 | -0.410486 | -2.713125 | 4.272677  |
| 32 | 6 | 0 | -1.637894 | -4.611730 | 1.652747  |
| 33 | 1 | 0 | -2.079962 | -5.610505 | 1.578618  |
| 34 | 1 | 0 | -0.634314 | -4.730444 | 2.071289  |
| 35 | 1 | 0 | -2.227943 | -4.020364 | 2.357149  |
| 36 | 6 | 0 | -0.497615 | -4.640375 | -0.551444 |
| 37 | 1 | 0 | 0.464041  | -4.581720 | -0.031629 |
| 38 | 1 | 0 | -0.735981 | -5.698577 | -0.697326 |
| 39 | 1 | 0 | -0.373476 | -4.176837 | -1.531350 |
| 40 | 6 | 0 | -4.147736 | -4.044026 | 0.486515  |
| 41 | 1 | 0 | -5.066532 | -3.767002 | -0.038593 |
| 42 | 1 | 0 | -4.220670 | -5.100676 | 0.761096  |
| 43 | 1 | 0 | -4.095850 | -3.452692 | 1.405701  |
| 44 | 6 | 0 | -3.106965 | -4.546285 | -1.716627 |
| 45 | 1 | 0 | -3.045887 | -5.625121 | -1.538880 |
| 46 | 1 | 0 | -4.083126 | -4.332416 | -2.160051 |
| 47 | 1 | 0 | -2.341874 | -4.270980 | -2.445291 |
| 48 | 6 | 0 | 2.116397  | 3.864333  | -0.666740 |
| 49 | 1 | 0 | 2.601136  | 4.843019  | -0.738599 |
| 50 | 1 | 0 | 2.893230  | 3.109610  | -0.503809 |
| 51 | 1 | 0 | 1.636939  | 3.645633  | -1.622915 |
| 52 | 6 | 0 | 1.858945  | 4.136614  | 1.784897  |
| 53 | 1 | 0 | 2.739860  | 3.493870  | 1.874514  |
| 54 | 1 | 0 | 2.201092  | 5.177110  | 1.793961  |
| 55 | 1 | 0 | 1.230418  | 3.973589  | 2.662896  |
| 56 | 6 | 0 | -0.847531 | 5.076987  | 1.548803  |
| 57 | 1 | 0 | -0.276362 | 5.855661  | 2.063435  |
| 58 | 1 | 0 | -1.841279 | 5.473179  | 1.323545  |
| 59 | 1 | 0 | -0.969220 | 4.230947  | 2.233935  |
| 60 | 6 | 0 | -0.028627 | 5.809586  | -0.696351 |
| 61 | 1 | 0 | -0.988892 | 6.317569  | -0.819066 |

|     |    |   |           |           |           |
|-----|----|---|-----------|-----------|-----------|
| 62  | 1  | 0 | 0.689808  | 6.538453  | -0.306003 |
| 63  | 1  | 0 | 0.309818  | 5.484266  | -1.681836 |
| 64  | 5  | 0 | -0.300359 | -0.008179 | -1.597308 |
| 65  | 5  | 0 | -0.177327 | -1.514685 | -2.584313 |
| 66  | 5  | 0 | 2.496060  | -0.771815 | -1.954443 |
| 67  | 5  | 0 | 2.235859  | 0.761449  | -2.798548 |
| 68  | 1  | 0 | 1.599144  | 0.802010  | -0.459099 |
| 69  | 5  | 0 | 1.512333  | -1.984767 | -2.771991 |
| 70  | 1  | 0 | 0.910306  | -1.658148 | -0.436946 |
| 71  | 5  | 0 | 0.656437  | -1.208996 | -4.103347 |
| 72  | 1  | 0 | -0.989592 | -2.350188 | -2.392586 |
| 73  | 5  | 0 | 1.110536  | 0.491539  | -4.121739 |
| 74  | 1  | 0 | -1.476311 | 0.264876  | -3.913926 |
| 75  | 1  | 0 | 0.242476  | 2.333502  | -2.433044 |
| 76  | 5  | 0 | 2.322229  | -0.740729 | -3.715769 |
| 77  | 1  | 0 | 3.080190  | 1.586729  | -2.694903 |
| 78  | 1  | 0 | 1.821906  | -3.121292 | -2.652351 |
| 79  | 1  | 0 | 0.374424  | -1.816536 | -5.081342 |
| 80  | 1  | 0 | 1.168694  | 1.137998  | -5.113693 |
| 81  | 1  | 0 | 3.253649  | -0.991738 | -4.403943 |
| 82  | 77 | 0 | -1.790071 | 0.498753  | -0.115589 |
| 83  | 6  | 0 | -2.913858 | 1.601568  | -1.733427 |
| 84  | 6  | 0 | -3.376657 | 1.665063  | 1.077512  |
| 85  | 6  | 0 | -3.687840 | 0.302748  | 1.184711  |
| 86  | 6  | 0 | -3.379605 | 0.269567  | -1.658916 |
| 87  | 6  | 0 | -3.724279 | 2.768242  | -1.224633 |
| 88  | 1  | 0 | -2.205648 | 1.840889  | -2.524493 |
| 89  | 6  | 0 | -4.193543 | 2.621131  | 0.227320  |
| 90  | 1  | 0 | -2.837569 | 2.107409  | 1.914446  |
| 91  | 6  | 0 | -4.816388 | -0.320865 | 0.404684  |
| 92  | 1  | 0 | -3.378934 | -0.214222 | 2.091011  |
| 93  | 6  | 0 | -4.759546 | -0.054338 | -1.104723 |
| 94  | 1  | 0 | -2.999151 | -0.426468 | -2.402613 |
| 95  | 1  | 0 | -3.121854 | 3.670781  | -1.321174 |
| 96  | 1  | 0 | -4.592189 | 2.902408  | -1.890402 |
| 97  | 1  | 0 | -4.186692 | 3.604807  | 0.708604  |
| 98  | 1  | 0 | -5.239556 | 2.286332  | 0.258127  |
| 99  | 1  | 0 | -4.803111 | -1.397680 | 0.578287  |
| 100 | 1  | 0 | -5.770912 | 0.042030  | 0.818452  |
| 101 | 1  | 0 | -5.433741 | 0.772685  | -1.367584 |
| 102 | 1  | 0 | -5.141985 | -0.933944 | -1.630727 |

|     |   |   |           |           |           |
|-----|---|---|-----------|-----------|-----------|
| 103 | 1 | 0 | -0.888385 | 1.103203  | 1.109571  |
| 104 | 6 | 0 | 0.949110  | -1.182069 | -1.410066 |
| 105 | 6 | 0 | 1.360751  | 0.366407  | -1.424903 |
| 106 | 5 | 0 | 0.543728  | 1.202880  | -2.613895 |
| 107 | 5 | 0 | -0.437785 | 0.000055  | -3.405557 |
| 108 | 5 | 0 | 3.885776  | -0.880107 | -1.024395 |
| 109 | 8 | 0 | 4.905925  | -1.782919 | -1.179365 |
| 110 | 8 | 0 | 4.181081  | 0.097680  | -0.088787 |
| 111 | 6 | 0 | 5.910896  | -1.476740 | -0.173424 |
| 112 | 6 | 0 | 5.615252  | 0.019290  | 0.141059  |
| 113 | 6 | 0 | 7.279842  | -1.745268 | -0.763084 |
| 114 | 1 | 0 | 8.068584  | -1.441455 | -0.066288 |
| 115 | 1 | 0 | 7.399820  | -2.813269 | -0.961738 |
| 116 | 1 | 0 | 7.423739  | -1.211068 | -1.703766 |
| 117 | 6 | 0 | 5.646319  | -2.394342 | 1.011243  |
| 118 | 1 | 0 | 5.632093  | -3.431446 | 0.667836  |
| 119 | 1 | 0 | 6.420236  | -2.296415 | 1.778840  |
| 120 | 1 | 0 | 4.676905  | -2.177057 | 1.472569  |
| 121 | 6 | 0 | 5.919216  | 0.456256  | 1.558586  |
| 122 | 1 | 0 | 6.997190  | 0.422782  | 1.749152  |
| 123 | 1 | 0 | 5.582990  | 1.486824  | 1.707366  |
| 124 | 1 | 0 | 5.421863  | -0.169350 | 2.301857  |
| 125 | 6 | 0 | 6.259127  | 0.971198  | -0.858465 |
| 126 | 1 | 0 | 5.837738  | 1.971322  | -0.725954 |
| 127 | 1 | 0 | 7.342963  | 1.032596  | -0.721630 |
| 128 | 1 | 0 | 6.057119  | 0.657344  | -1.887100 |

---

## TS6u

| Center<br>Number | Atomic<br>Number | Atomic<br>Type | Coordinates (Angstroms) |           |           |
|------------------|------------------|----------------|-------------------------|-----------|-----------|
|                  |                  |                | X                       | Y         | Z         |
| 1                | 5                | 0              | -2.343423               | 1.006581  | 0.269759  |
| 2                | 5                | 0              | 0.214964                | 1.958553  | -0.366502 |
| 3                | 5                | 0              | -2.082919               | -1.668598 | -0.425462 |
| 4                | 8                | 0              | -2.039064               | -2.883377 | -1.093235 |
| 5                | 8                | 0              | -0.443429               | 3.177743  | -0.406030 |
| 6                | 8                | 0              | 1.537589                | 2.138823  | 0.020613  |
| 7                | 8                | 0              | -2.341755               | 1.413133  | 1.591011  |
| 8                | 8                | 0              | -3.508575               | 1.362235  | -0.377169 |

|    |   |   |           |           |           |
|----|---|---|-----------|-----------|-----------|
| 9  | 8 | 0 | -3.146569 | -1.634409 | 0.459085  |
| 10 | 6 | 0 | 1.802712  | 3.561955  | 0.152562  |
| 11 | 6 | 0 | 0.367598  | 4.151750  | 0.300427  |
| 12 | 6 | 0 | -3.251227 | -3.621469 | -0.790052 |
| 13 | 6 | 0 | -3.754867 | -2.948820 | 0.528077  |
| 14 | 6 | 0 | -4.258363 | 2.225445  | 0.517751  |
| 15 | 6 | 0 | -3.690097 | 1.837392  | 1.918694  |
| 16 | 6 | 0 | -3.929390 | 3.655899  | 0.116033  |
| 17 | 1 | 0 | -4.191209 | 3.802625  | -0.935577 |
| 18 | 1 | 0 | -4.485598 | 4.385762  | 0.712958  |
| 19 | 1 | 0 | -2.857100 | 3.846872  | 0.221792  |
| 20 | 6 | 0 | -3.617091 | 2.977245  | 2.914214  |
| 21 | 1 | 0 | -4.621710 | 3.335389  | 3.164627  |
| 22 | 1 | 0 | -3.143478 | 2.631846  | 3.837159  |
| 23 | 1 | 0 | -3.038400 | 3.820816  | 2.534224  |
| 24 | 6 | 0 | -4.394195 | 0.640632  | 2.541518  |
| 25 | 1 | 0 | -3.830380 | 0.311556  | 3.418796  |
| 26 | 1 | 0 | -5.411336 | 0.891868  | 2.859410  |
| 27 | 1 | 0 | -4.428954 | -0.192463 | 1.836838  |
| 28 | 6 | 0 | -5.733707 | 1.935130  | 0.333056  |
| 29 | 1 | 0 | -6.335849 | 2.502955  | 1.050837  |
| 30 | 1 | 0 | -6.050377 | 2.224344  | -0.672792 |
| 31 | 1 | 0 | -5.949338 | 0.872422  | 0.464474  |
| 32 | 6 | 0 | -5.260566 | -2.772144 | 0.611415  |
| 33 | 1 | 0 | -5.772150 | -3.739444 | 0.557252  |
| 34 | 1 | 0 | -5.529899 | -2.309211 | 1.565266  |
| 35 | 1 | 0 | -5.638823 | -2.134599 | -0.190952 |
| 36 | 6 | 0 | -3.243800 | -3.621878 | 1.792268  |
| 37 | 1 | 0 | -3.480926 | -2.992424 | 2.654504  |
| 38 | 1 | 0 | -3.710744 | -4.600710 | 1.941510  |
| 39 | 1 | 0 | -2.159476 | -3.754921 | 1.769833  |
| 40 | 6 | 0 | -4.201159 | -3.412822 | -1.962134 |
| 41 | 1 | 0 | -3.724919 | -3.764115 | -2.882140 |
| 42 | 1 | 0 | -5.135770 | -3.967342 | -1.832496 |
| 43 | 1 | 0 | -4.446996 | -2.353317 | -2.088804 |
| 44 | 6 | 0 | -2.898349 | -5.089619 | -0.657138 |
| 45 | 1 | 0 | -3.776019 | -5.677947 | -0.367459 |
| 46 | 1 | 0 | -2.537944 | -5.474821 | -1.614917 |
| 47 | 1 | 0 | -2.115235 | -5.249373 | 0.086611  |
| 48 | 6 | 0 | -0.120484 | 4.172206  | 1.741213  |
| 49 | 1 | 0 | 0.436447  | 4.892470  | 2.348349  |

|    |    |   |           |           |           |
|----|----|---|-----------|-----------|-----------|
| 50 | 1  | 0 | -1.175005 | 4.459470  | 1.755104  |
| 51 | 1  | 0 | -0.044906 | 3.183321  | 2.203619  |
| 52 | 6  | 0 | 0.165783  | 5.508269  | -0.344910 |
| 53 | 1  | 0 | -0.869531 | 5.833214  | -0.209736 |
| 54 | 1  | 0 | 0.815017  | 6.260729  | 0.116013  |
| 55 | 1  | 0 | 0.371774  | 5.483954  | -1.416871 |
| 56 | 6  | 0 | 2.500448  | 4.010596  | -1.122449 |
| 57 | 1  | 0 | 2.793674  | 5.063806  | -1.072630 |
| 58 | 1  | 0 | 3.404730  | 3.413821  | -1.273586 |
| 59 | 1  | 0 | 1.853801  | 3.877726  | -1.995458 |
| 60 | 6  | 0 | 2.703259  | 3.761760  | 1.355321  |
| 61 | 1  | 0 | 3.686961  | 3.321882  | 1.165183  |
| 62 | 1  | 0 | 2.850346  | 4.826838  | 1.564701  |
| 63 | 1  | 0 | 2.289658  | 3.286062  | 2.247554  |
| 64 | 5  | 0 | 0.290131  | -0.927340 | 1.028227  |
| 65 | 5  | 0 | 0.737806  | -0.134897 | 2.584934  |
| 66 | 5  | 0 | -0.258065 | -1.584238 | 2.602899  |
| 67 | 5  | 0 | 0.376680  | -2.673618 | 1.376952  |
| 68 | 6  | 0 | 1.695052  | -1.873078 | 0.755744  |
| 69 | 6  | 0 | 1.890346  | -0.441641 | 1.430638  |
| 70 | 5  | 0 | 1.012488  | -1.354015 | 3.822640  |
| 71 | 5  | 0 | 2.382460  | -0.569910 | 3.034554  |
| 72 | 1  | 0 | 0.373029  | 0.982124  | 2.724449  |
| 73 | 5  | 0 | 0.792392  | -2.933513 | 3.074186  |
| 74 | 1  | 0 | -1.412994 | -1.531200 | 2.857766  |
| 75 | 5  | 0 | 2.024772  | -3.117868 | 1.829331  |
| 76 | 1  | 0 | -0.215426 | -3.400719 | 0.658710  |
| 77 | 5  | 0 | 3.020429  | -1.659358 | 1.805264  |
| 78 | 1  | 0 | 2.009141  | -1.960758 | -0.277648 |
| 79 | 1  | 0 | 2.256311  | 0.355193  | 0.788255  |
| 80 | 5  | 0 | 2.432244  | -2.302611 | 3.339044  |
| 81 | 1  | 0 | 0.752518  | -1.134806 | 4.957233  |
| 82 | 1  | 0 | 3.106291  | 0.268371  | 3.451871  |
| 83 | 1  | 0 | 0.373322  | -3.876473 | 3.657710  |
| 84 | 1  | 0 | 2.488231  | -4.113490 | 1.391453  |
| 85 | 1  | 0 | 3.195750  | -2.779669 | 4.107593  |
| 86 | 77 | 0 | -0.738418 | 0.028118  | -0.718232 |
| 87 | 6  | 0 | 1.163455  | -0.225184 | -1.988186 |
| 88 | 6  | 0 | -1.216466 | 1.232062  | -2.551475 |
| 89 | 6  | 0 | -2.025862 | 0.070126  | -2.573325 |
| 90 | 6  | 0 | 0.365922  | -1.364861 | -2.186167 |



|     |   |   |           |           |           |
|-----|---|---|-----------|-----------|-----------|
| 91  | 6 | 0 | 1.287018  | 0.874980  | -3.012848 |
| 92  | 1 | 0 | 2.008870  | -0.277964 | -1.302973 |
| 93  | 6 | 0 | -0.056826 | 1.420788  | -3.515305 |
| 94  | 1 | 0 | -1.697513 | 2.138403  | -2.193800 |
| 95  | 6 | 0 | -1.789974 | -1.070369 | -3.527589 |
| 96  | 1 | 0 | -3.051912 | 0.201384  | -2.239484 |
| 97  | 6 | 0 | -0.359362 | -1.609120 | -3.494932 |
| 98  | 1 | 0 | 0.564749  | -2.258826 | -1.600791 |
| 99  | 1 | 0 | 1.857439  | 1.686877  | -2.549572 |
| 100 | 1 | 0 | 1.897683  | 0.525974  | -3.861484 |
| 101 | 1 | 0 | 0.046914  | 2.491180  | -3.726188 |
| 102 | 1 | 0 | -0.322383 | 0.957940  | -4.475169 |
| 103 | 1 | 0 | -2.479797 | -1.876983 | -3.278633 |
| 104 | 1 | 0 | -2.057897 | -0.740318 | -4.544058 |
| 105 | 1 | 0 | 0.234279  | -1.170009 | -4.307575 |
| 106 | 1 | 0 | -0.375790 | -2.686392 | -3.686025 |
| 107 | 1 | 0 | -0.697828 | 0.200828  | 0.885460  |
| 108 | 5 | 0 | 4.444061  | -1.392559 | 0.964475  |
| 109 | 8 | 0 | 5.701350  | -1.140491 | 1.436818  |
| 110 | 8 | 0 | 4.341456  | -1.218146 | -0.404908 |
| 111 | 6 | 0 | 6.561901  | -0.938423 | 0.277442  |
| 112 | 6 | 0 | 5.542357  | -0.514936 | -0.822883 |
| 113 | 6 | 0 | 7.227159  | -2.274038 | -0.015923 |
| 114 | 1 | 0 | 7.953319  | -2.191511 | -0.830310 |
| 115 | 1 | 0 | 7.751740  | -2.619429 | 0.877796  |
| 116 | 1 | 0 | 6.487940  | -3.032660 | -0.288556 |
| 117 | 6 | 0 | 7.594390  | 0.113364  | 0.624499  |
| 118 | 1 | 0 | 8.258194  | -0.257852 | 1.409078  |
| 119 | 1 | 0 | 8.208654  | 0.355449  | -0.249430 |
| 120 | 1 | 0 | 7.128570  | 1.032019  | 0.985819  |
| 121 | 6 | 0 | 5.194839  | 0.967577  | -0.777419 |
| 122 | 1 | 0 | 6.015762  | 1.594947  | -1.138302 |
| 123 | 1 | 0 | 4.318546  | 1.147540  | -1.408296 |
| 124 | 1 | 0 | 4.942754  | 1.279642  | 0.242316  |
| 125 | 6 | 0 | 5.894855  | -0.941966 | -2.231322 |
| 126 | 1 | 0 | 5.107338  | -0.627565 | -2.922413 |
| 127 | 1 | 0 | 6.832329  | -0.477911 | -2.555576 |
| 128 | 1 | 0 | 5.999710  | -2.025418 | -2.310452 |

---

**TS7**

---

| Center<br>Number | Atomic<br>Number | Atomic<br>Type | Coordinates (Angstroms) |           |           |
|------------------|------------------|----------------|-------------------------|-----------|-----------|
|                  |                  |                | X                       | Y         | Z         |
| 1                | 5                | 0              | -3.053878               | 0.127361  | 0.310360  |
| 2                | 8                | 0              | -3.622342               | 1.388569  | 0.442498  |
| 3                | 8                | 0              | -3.268283               | -0.638843 | 1.446726  |
| 4                | 6                | 0              | -4.212440               | 1.514344  | 1.757343  |
| 5                | 6                | 0              | -4.242189               | 0.028625  | 2.276086  |
| 6                | 6                | 0              | -5.571519               | -0.673526 | 2.024934  |
| 7                | 1                | 0              | -5.474154               | -1.732800 | 2.278712  |
| 8                | 1                | 0              | -6.381753               | -0.249685 | 2.626398  |
| 9                | 1                | 0              | -5.860253               | -0.611569 | 0.970454  |
| 10               | 6                | 0              | -3.820757               | -0.140367 | 3.723269  |
| 11               | 1                | 0              | -4.492658               | 0.400435  | 4.398546  |
| 12               | 1                | 0              | -3.850436               | -1.199571 | 3.997763  |
| 13               | 1                | 0              | -2.800692               | 0.220077  | 3.870950  |
| 14               | 6                | 0              | -5.582666               | 2.149353  | 1.584441  |
| 15               | 1                | 0              | -6.099755               | 2.237602  | 2.546189  |
| 16               | 1                | 0              | -5.467513               | 3.156239  | 1.172962  |
| 17               | 1                | 0              | -6.220283               | 1.580257  | 0.903577  |
| 18               | 6                | 0              | -3.326060               | 2.436226  | 2.579358  |
| 19               | 1                | 0              | -3.248304               | 3.403775  | 2.076330  |
| 20               | 1                | 0              | -3.743995               | 2.598654  | 3.578739  |
| 21               | 1                | 0              | -2.318294               | 2.030739  | 2.669736  |
| 22               | 5                | 0              | -1.242712               | -2.002618 | 0.060513  |
| 23               | 8                | 0              | -0.418644               | -2.225591 | 1.154051  |
| 24               | 8                | 0              | -2.038469               | -3.109194 | -0.189353 |
| 25               | 6                | 0              | -1.900379               | -4.061115 | 0.883843  |
| 26               | 6                | 0              | -0.595005               | -3.590055 | 1.622661  |
| 27               | 6                | 0              | -1.807858               | -5.449993 | 0.278282  |
| 28               | 1                | 0              | -1.647705               | -6.206913 | 1.053865  |
| 29               | 1                | 0              | -2.742377               | -5.690008 | -0.235646 |
| 30               | 1                | 0              | -0.996526               | -5.521499 | -0.448898 |
| 31               | 6                | 0              | -3.159961               | -3.945668 | 1.733254  |
| 32               | 1                | 0              | -4.030546               | -4.135883 | 1.098221  |
| 33               | 1                | 0              | -3.170699               | -4.672501 | 2.551659  |
| 34               | 1                | 0              | -3.260193               | -2.938057 | 2.140864  |
| 35               | 6                | 0              | -0.728191               | -3.561659 | 3.135421  |

|    |    |   |           |           |           |
|----|----|---|-----------|-----------|-----------|
| 36 | 1  | 0 | -1.001718 | -4.549537 | 3.521309  |
| 37 | 1  | 0 | 0.228283  | -3.288698 | 3.592930  |
| 38 | 1  | 0 | -1.483546 | -2.839403 | 3.456459  |
| 39 | 6  | 0 | 0.655626  | -4.369770 | 1.241420  |
| 40 | 1  | 0 | 1.533031  | -3.891064 | 1.688826  |
| 41 | 1  | 0 | 0.612548  | -5.398683 | 1.612132  |
| 42 | 1  | 0 | 0.810116  | -4.398716 | 0.161488  |
| 43 | 5  | 0 | 0.521448  | -0.828925 | -1.852807 |
| 44 | 5  | 0 | 1.036608  | -2.557041 | -1.972818 |
| 45 | 5  | 0 | 0.826510  | -1.642659 | -3.441925 |
| 46 | 5  | 0 | 1.463714  | -0.035204 | -3.161524 |
| 47 | 6  | 0 | 2.050570  | -0.088672 | -1.606174 |
| 48 | 6  | 0 | 1.805827  | -1.518740 | -0.928363 |
| 49 | 5  | 0 | 2.174545  | -2.789447 | -3.294959 |
| 50 | 5  | 0 | 2.759242  | -2.711799 | -1.635480 |
| 51 | 1  | 0 | 0.282266  | -3.362042 | -1.548246 |
| 52 | 5  | 0 | 2.441710  | -1.215197 | -4.038803 |
| 53 | 1  | 0 | -0.083049 | -1.863629 | -4.170582 |
| 54 | 5  | 0 | 3.186244  | -0.172599 | -2.835228 |
| 55 | 1  | 0 | 1.068611  | 0.995334  | -3.588279 |
| 56 | 5  | 0 | 3.386582  | -1.093707 | -1.337981 |
| 57 | 1  | 0 | 1.586724  | -1.523704 | 0.134177  |
| 58 | 5  | 0 | 3.640173  | -1.873888 | -2.906379 |
| 59 | 1  | 0 | 2.195539  | -3.807449 | -3.902385 |
| 60 | 1  | 0 | 3.149681  | -3.586641 | -0.938858 |
| 61 | 1  | 0 | 2.672117  | -1.073327 | -5.193526 |
| 62 | 1  | 0 | 3.894722  | 0.765139  | -2.992698 |
| 63 | 1  | 0 | 4.734450  | -2.202751 | -3.223820 |
| 64 | 77 | 0 | -1.447863 | -0.300206 | -1.077563 |
| 65 | 6  | 0 | -2.694412 | 1.734794  | -2.236565 |
| 66 | 6  | 0 | -3.621720 | -0.783274 | -1.317861 |
| 67 | 6  | 0 | -2.686493 | -1.332338 | -2.344541 |
| 68 | 6  | 0 | -1.715566 | 1.308461  | -3.077359 |
| 69 | 6  | 0 | -4.158649 | 1.447888  | -2.448867 |
| 70 | 1  | 0 | -2.453595 | 2.443263  | -1.450847 |
| 71 | 6  | 0 | -4.707637 | 0.163199  | -1.801420 |
| 72 | 1  | 0 | -4.001823 | -1.589899 | -0.685596 |
| 73 | 6  | 0 | -2.770107 | -0.894564 | -3.804602 |
| 74 | 1  | 0 | -2.518633 | -2.403678 | -2.246725 |
| 75 | 6  | 0 | -1.964388 | 0.356254  | -4.206247 |
| 76 | 1  | 0 | -0.719496 | 1.727554  | -2.978867 |

|     |   |   |           |           |           |
|-----|---|---|-----------|-----------|-----------|
| 77  | 1 | 0 | -4.724742 | 2.305323  | -2.071060 |
| 78  | 1 | 0 | -4.337891 | 1.413363  | -3.531146 |
| 79  | 1 | 0 | -5.362744 | 0.424981  | -0.965675 |
| 80  | 1 | 0 | -5.336796 | -0.381775 | -2.519994 |
| 81  | 1 | 0 | -2.432624 | -1.728639 | -4.427284 |
| 82  | 1 | 0 | -3.831368 | -0.754381 | -4.056506 |
| 83  | 1 | 0 | -2.480979 | 0.875027  | -5.027404 |
| 84  | 1 | 0 | -0.997206 | 0.047772  | -4.611091 |
| 85  | 5 | 0 | -0.344255 | 2.000394  | -0.018977 |
| 86  | 5 | 0 | 0.048087  | 0.786730  | 1.160119  |
| 87  | 8 | 0 | 0.440411  | 2.334151  | -1.100890 |
| 88  | 8 | 0 | -0.844707 | 3.118083  | 0.613967  |
| 89  | 8 | 0 | -0.576122 | 0.591051  | 2.362838  |
| 90  | 6 | 0 | -0.349050 | 4.305816  | -0.071285 |
| 91  | 6 | 0 | 0.804399  | 3.734598  | -0.966543 |
| 92  | 8 | 0 | 1.422207  | 0.708795  | 1.255035  |
| 93  | 6 | 0 | 0.439442  | 0.735821  | 3.397488  |
| 94  | 6 | 0 | 1.776307  | 0.427518  | 2.640789  |
| 95  | 6 | 0 | 0.906150  | 4.337904  | -2.352187 |
| 96  | 1 | 0 | 1.147472  | 5.404579  | -2.295144 |
| 97  | 1 | 0 | 1.703299  | 3.839602  | -2.910767 |
| 98  | 1 | 0 | -0.021061 | 4.223204  | -2.917600 |
| 99  | 6 | 0 | 2.166615  | 3.741083  | -0.282422 |
| 100 | 1 | 0 | 2.885568  | 3.189986  | -0.897040 |
| 101 | 1 | 0 | 2.544721  | 4.758115  | -0.140851 |
| 102 | 1 | 0 | 2.124585  | 3.239863  | 0.689811  |
| 103 | 6 | 0 | 0.103096  | 5.285257  | 0.995728  |
| 104 | 1 | 0 | 0.525428  | 6.187600  | 0.541204  |
| 105 | 1 | 0 | -0.752333 | 5.583804  | 1.608316  |
| 106 | 1 | 0 | 0.855949  | 4.850688  | 1.656959  |
| 107 | 6 | 0 | -1.501927 | 4.906468  | -0.859408 |
| 108 | 1 | 0 | -2.358081 | 5.048630  | -0.193990 |
| 109 | 1 | 0 | -1.225049 | 5.879604  | -1.276534 |
| 110 | 1 | 0 | -1.817909 | 4.265984  | -1.684384 |
| 111 | 1 | 0 | 2.020138  | 0.766922  | -0.944888 |
| 112 | 6 | 0 | 2.204894  | -1.028892 | 2.704647  |
| 113 | 1 | 0 | 3.041188  | -1.190661 | 2.013255  |
| 114 | 1 | 0 | 2.543982  | -1.304154 | 3.708784  |
| 115 | 1 | 0 | 1.382814  | -1.683958 | 2.410676  |
| 116 | 6 | 0 | 2.940558  | 1.330289  | 2.996111  |
| 117 | 1 | 0 | 3.758177  | 1.128789  | 2.299957  |

|     |   |   |           |           |           |
|-----|---|---|-----------|-----------|-----------|
| 118 | 1 | 0 | 2.687994  | 2.389668  | 2.910360  |
| 119 | 1 | 0 | 3.287505  | 1.139154  | 4.017867  |
| 120 | 6 | 0 | 0.134092  | -0.214704 | 4.534401  |
| 121 | 1 | 0 | 0.037234  | -1.241150 | 4.181549  |
| 122 | 1 | 0 | 0.927741  | -0.176007 | 5.288422  |
| 123 | 1 | 0 | -0.802397 | 0.067457  | 5.023339  |
| 124 | 6 | 0 | 0.338507  | 2.179278  | 3.873910  |
| 125 | 1 | 0 | 0.488049  | 2.880768  | 3.046926  |
| 126 | 1 | 0 | -0.662999 | 2.355731  | 4.276138  |
| 127 | 1 | 0 | 1.066443  | 2.398271  | 4.660799  |
| 128 | 5 | 0 | 4.614241  | -0.609245 | -0.305757 |
| 129 | 8 | 0 | 5.666052  | -1.415940 | 0.052374  |
| 130 | 8 | 0 | 4.793209  | 0.702165  | 0.101262  |
| 131 | 6 | 0 | 6.575795  | -0.618526 | 0.857072  |
| 132 | 6 | 0 | 6.206005  | 0.831816  | 0.427939  |
| 133 | 6 | 0 | 6.379436  | 1.888452  | 1.498579  |
| 134 | 1 | 0 | 7.439559  | 2.018413  | 1.741006  |
| 135 | 1 | 0 | 5.996813  | 2.847563  | 1.137450  |
| 136 | 1 | 0 | 5.849319  | 1.639434  | 2.419722  |
| 137 | 6 | 0 | 6.899165  | 1.261511  | -0.858593 |
| 138 | 1 | 0 | 6.434703  | 2.180203  | -1.226519 |
| 139 | 1 | 0 | 7.965542  | 1.450728  | -0.702934 |
| 140 | 1 | 0 | 6.792741  | 0.499029  | -1.636589 |
| 141 | 6 | 0 | 6.254047  | -0.908937 | 2.315670  |
| 142 | 1 | 0 | 6.300716  | -1.987160 | 2.486634  |
| 143 | 1 | 0 | 6.964642  | -0.421885 | 2.990826  |
| 144 | 1 | 0 | 5.246147  | -0.568922 | 2.575569  |
| 145 | 6 | 0 | 7.995677  | -1.034680 | 0.531724  |
| 146 | 1 | 0 | 8.716616  | -0.393532 | 1.050594  |
| 147 | 1 | 0 | 8.167755  | -2.064423 | 0.855017  |
| 148 | 1 | 0 | 8.193508  | -0.982717 | -0.540242 |

---

**TS7u**

---

| Center<br>Number | Atomic<br>Number | Atomic<br>Type | Coordinates (Angstroms) |           |           |
|------------------|------------------|----------------|-------------------------|-----------|-----------|
|                  |                  |                | X                       | Y         | Z         |
| 1                | 5                | 0              | -1.984075               | 0.519273  | -1.758102 |
| 2                | 8                | 0              | -2.178173               | 1.881445  | -1.965757 |
| 3                | 8                | 0              | -3.188260               | -0.165977 | -1.759105 |
| 4                | 6                | 0              | -3.596554               | 2.150753  | -2.089713 |
| 5                | 6                | 0              | -4.226689               | 0.712020  | -2.234827 |
| 6                | 6                | 0              | -4.498783               | 0.307385  | -3.679306 |
| 7                | 1                | 0              | -4.809393               | -0.740849 | -3.706370 |
| 8                | 1                | 0              | -5.290010               | 0.911228  | -4.134672 |
| 9                | 1                | 0              | -3.599426               | 0.401045  | -4.296832 |
| 10               | 6                | 0              | -5.460893               | 0.479246  | -1.384294 |
| 11               | 1                | 0              | -6.282091               | 1.139473  | -1.683682 |
| 12               | 1                | 0              | -5.799347               | -0.555150 | -1.501493 |
| 13               | 1                | 0              | -5.234849               | 0.642581  | -0.329501 |
| 14               | 6                | 0              | -3.779704               | 3.047219  | -3.304204 |
| 15               | 1                | 0              | -4.838364               | 3.274619  | -3.469925 |
| 16               | 1                | 0              | -3.256235               | 3.993460  | -3.136353 |
| 17               | 1                | 0              | -3.378886               | 2.599551  | -4.217087 |
| 18               | 6                | 0              | -4.047759               | 2.893964  | -0.843574 |
| 19               | 1                | 0              | -3.494741               | 3.833166  | -0.760711 |
| 20               | 1                | 0              | -5.116449               | 3.128831  | -0.892446 |
| 21               | 1                | 0              | -3.844470               | 2.313888  | 0.055847  |
| 22               | 5                | 0              | -1.355702               | -1.960144 | -0.488056 |
| 23               | 8                | 0              | -2.213101               | -2.324476 | 0.532527  |
| 24               | 8                | 0              | -1.355284               | -2.913173 | -1.500218 |
| 25               | 6                | 0              | -2.412063               | -3.862662 | -1.241119 |
| 26               | 6                | 0              | -2.654960               | -3.688528 | 0.291745  |
| 27               | 6                | 0              | -1.929106               | -5.240780 | -1.650289 |
| 28               | 1                | 0              | -2.670965               | -6.005974 | -1.396457 |
| 29               | 1                | 0              | -1.772578               | -5.273804 | -2.732015 |
| 30               | 1                | 0              | -0.985930               | -5.498219 | -1.164206 |
| 31               | 6                | 0              | -3.604860               | -3.443811 | -2.090248 |
| 32               | 1                | 0              | -3.299563               | -3.410957 | -3.140789 |
| 33               | 1                | 0              | -4.436079               | -4.150413 | -1.998662 |
| 34               | 1                | 0              | -3.945667               | -2.444441 | -1.810936 |
| 35               | 6                | 0              | -4.110352               | -3.813432 | 0.699860  |

|    |    |   |           |           |           |
|----|----|---|-----------|-----------|-----------|
| 36 | 1  | 0 | -4.503297 | -4.798385 | 0.424007  |
| 37 | 1  | 0 | -4.209634 | -3.713609 | 1.785524  |
| 38 | 1  | 0 | -4.729993 | -3.049170 | 0.224017  |
| 39 | 6  | 0 | -1.797684 | -4.608119 | 1.148141  |
| 40 | 1  | 0 | -1.889082 | -4.318393 | 2.198826  |
| 41 | 1  | 0 | -2.115324 | -5.651340 | 1.051816  |
| 42 | 1  | 0 | -0.740667 | -4.539538 | 0.879777  |
| 43 | 5  | 0 | 0.989870  | -1.110770 | 0.867926  |
| 44 | 5  | 0 | 1.481779  | -2.840300 | 0.769126  |
| 45 | 5  | 0 | 3.216859  | -3.016448 | 1.042827  |
| 46 | 5  | 0 | 2.083092  | -3.408052 | 2.327623  |
| 47 | 1  | 0 | 0.983995  | -3.484484 | -0.091851 |
| 48 | 5  | 0 | 3.888012  | -1.413417 | 1.357597  |
| 49 | 1  | 0 | 2.767704  | -1.437682 | -0.705939 |
| 50 | 5  | 0 | 3.142654  | -0.816277 | 2.838191  |
| 51 | 1  | 0 | 2.671799  | 0.574573  | 0.926721  |
| 52 | 5  | 0 | 2.031958  | -2.042650 | 3.439128  |
| 53 | 1  | 0 | -0.357160 | -2.532378 | 2.549604  |
| 54 | 5  | 0 | 3.573572  | -2.517492 | 2.696886  |
| 55 | 1  | 0 | 3.846052  | -3.742608 | 0.352454  |
| 56 | 1  | 0 | 1.910810  | -4.531460 | 2.668694  |
| 57 | 1  | 0 | 3.717090  | 0.028064  | 3.436920  |
| 58 | 1  | 0 | 1.828966  | -2.160722 | 4.601829  |
| 59 | 1  | 0 | 4.479831  | -2.981584 | 3.303273  |
| 60 | 77 | 0 | -0.234931 | -0.257294 | -0.707137 |
| 61 | 6  | 0 | 0.700588  | 2.072795  | -2.053580 |
| 62 | 6  | 0 | -0.720330 | -0.266450 | -2.910274 |
| 63 | 6  | 0 | 0.504806  | -1.011509 | -2.462023 |
| 64 | 6  | 0 | 1.780617  | 1.448171  | -1.540852 |
| 65 | 6  | 0 | 0.331616  | 2.021920  | -3.507194 |
| 66 | 1  | 0 | 0.109365  | 2.710398  | -1.405158 |
| 67 | 6  | 0 | -0.536438 | 0.826045  | -3.954399 |
| 68 | 1  | 0 | -1.477086 | -0.993565 | -3.216707 |
| 69 | 6  | 0 | 1.890581  | -0.643466 | -2.992325 |
| 70 | 1  | 0 | 0.364730  | -2.090291 | -2.502998 |
| 71 | 6  | 0 | 2.651882  | 0.539119  | -2.347348 |
| 72 | 1  | 0 | 2.049977  | 1.665472  | -0.513259 |
| 73 | 1  | 0 | -0.188912 | 2.950749  | -3.760705 |
| 74 | 1  | 0 | 1.263401  | 2.021000  | -4.088883 |
| 75 | 1  | 0 | -1.519409 | 1.192282  | -4.265506 |
| 76 | 1  | 0 | -0.094600 | 0.361769  | -4.847623 |

|     |   |   |           |           |           |
|-----|---|---|-----------|-----------|-----------|
| 77  | 1 | 0 | 2.525218  | -1.535231 | -2.926458 |
| 78  | 1 | 0 | 1.784964  | -0.461546 | -4.072410 |
| 79  | 1 | 0 | 3.150844  | 1.116060  | -3.140408 |
| 80  | 1 | 0 | 3.469508  | 0.162983  | -1.722732 |
| 81  | 5 | 0 | -0.806710 | 1.848818  | 1.009746  |
| 82  | 5 | 0 | -1.831183 | 0.558758  | 1.568000  |
| 83  | 8 | 0 | 0.537258  | 2.106917  | 1.138748  |
| 84  | 8 | 0 | -1.563186 | 2.998835  | 1.092788  |
| 85  | 8 | 0 | -3.161215 | 0.456502  | 1.250788  |
| 86  | 6 | 0 | -0.690284 | 4.136834  | 1.309604  |
| 87  | 6 | 0 | 0.692565  | 3.464963  | 1.639939  |
| 88  | 8 | 0 | -1.564945 | 0.264531  | 2.879774  |
| 89  | 6 | 0 | -3.894379 | 0.359005  | 2.505834  |
| 90  | 6 | 0 | -2.807719 | -0.127064 | 3.526461  |
| 91  | 6 | 0 | 1.883997  | 4.094663  | 0.945611  |
| 92  | 1 | 0 | 2.025540  | 5.129034  | 1.275816  |
| 93  | 1 | 0 | 2.794820  | 3.539412  | 1.193668  |
| 94  | 1 | 0 | 1.770257  | 4.090398  | -0.141686 |
| 95  | 6 | 0 | 0.959497  | 3.313488  | 3.130520  |
| 96  | 1 | 0 | 1.866968  | 2.720391  | 3.274230  |
| 97  | 1 | 0 | 1.096798  | 4.282076  | 3.620572  |
| 98  | 1 | 0 | 0.142024  | 2.779024  | 3.624356  |
| 99  | 6 | 0 | -1.279205 | 4.949858  | 2.449580  |
| 100 | 1 | 0 | -0.647072 | 5.812752  | 2.684221  |
| 101 | 1 | 0 | -2.265613 | 5.322557  | 2.159837  |
| 102 | 1 | 0 | -1.397882 | 4.353425  | 3.356225  |
| 103 | 6 | 0 | -0.706125 | 4.976032  | 0.039549  |
| 104 | 1 | 0 | -1.726418 | 5.319433  | -0.150453 |
| 105 | 1 | 0 | -0.065670 | 5.857761  | 0.139146  |
| 106 | 1 | 0 | -0.380739 | 4.414468  | -0.838729 |
| 107 | 1 | 0 | 0.874219  | 0.290098  | 3.020317  |
| 108 | 6 | 0 | -2.764798 | -1.633914 | 3.714259  |
| 109 | 1 | 0 | -1.890104 | -1.895574 | 4.315621  |
| 110 | 1 | 0 | -3.660397 | -1.992238 | 4.232897  |
| 111 | 1 | 0 | -2.673789 | -2.139268 | 2.751234  |
| 112 | 6 | 0 | -2.853605 | 0.566397  | 4.875457  |
| 113 | 1 | 0 | -2.036226 | 0.200945  | 5.502013  |
| 114 | 1 | 0 | -2.750170 | 1.650058  | 4.782030  |
| 115 | 1 | 0 | -3.795944 | 0.352787  | 5.391330  |
| 116 | 6 | 0 | -5.049974 | -0.602209 | 2.327953  |
| 117 | 1 | 0 | -4.705087 | -1.556407 | 1.930659  |



|     |   |   |           |           |           |
|-----|---|---|-----------|-----------|-----------|
| 118 | 1 | 0 | -5.554722 | -0.778823 | 3.284050  |
| 119 | 1 | 0 | -5.787706 | -0.189149 | 1.634556  |
| 120 | 6 | 0 | -4.411159 | 1.762849  | 2.795216  |
| 121 | 1 | 0 | -3.591407 | 2.485878  | 2.845581  |
| 122 | 1 | 0 | -5.078424 | 2.074936  | 1.986159  |
| 123 | 1 | 0 | -4.975065 | 1.799757  | 3.732226  |
| 124 | 6 | 0 | 2.550733  | -1.652349 | 0.332572  |
| 125 | 5 | 0 | 1.405502  | -0.649006 | 2.553858  |
| 126 | 5 | 0 | 0.744656  | -2.241614 | 2.239816  |
| 127 | 6 | 0 | 2.510320  | -0.414994 | 1.339724  |
| 128 | 5 | 0 | 5.232050  | -0.769226 | 0.595486  |
| 129 | 8 | 0 | 6.122030  | 0.119771  | 1.145734  |
| 130 | 8 | 0 | 5.458540  | -0.980755 | -0.750352 |
| 131 | 6 | 0 | 6.836263  | 0.739213  | 0.042836  |
| 132 | 6 | 0 | 6.723208  | -0.338188 | -1.076295 |
| 133 | 6 | 0 | 6.639196  | 0.208237  | -2.486444 |
| 134 | 1 | 0 | 7.554926  | 0.749150  | -2.748101 |
| 135 | 1 | 0 | 6.519911  | -0.613045 | -3.198209 |
| 136 | 1 | 0 | 5.792234  | 0.886350  | -2.609933 |
| 137 | 6 | 0 | 7.797532  | -1.410731 | -0.978866 |
| 138 | 1 | 0 | 7.538543  | -2.242200 | -1.638577 |
| 139 | 1 | 0 | 8.777877  | -1.027209 | -1.277575 |
| 140 | 1 | 0 | 7.875574  | -1.800497 | 0.039841  |
| 141 | 6 | 0 | 6.081017  | 2.019774  | -0.290365 |
| 142 | 1 | 0 | 6.006086  | 2.636530  | 0.608836  |
| 143 | 1 | 0 | 6.586956  | 2.601883  | -1.066639 |
| 144 | 1 | 0 | 5.063744  | 1.801636  | -0.636280 |
| 145 | 6 | 0 | 8.249442  | 1.051677  | 0.487927  |
| 146 | 1 | 0 | 8.839670  | 1.450252  | -0.344278 |
| 147 | 1 | 0 | 8.234936  | 1.803928  | 1.280652  |
| 148 | 1 | 0 | 8.753377  | 0.165022  | 0.876216  |

---

**TS8**

---

| Center<br>Number | Atomic<br>Number | Atomic<br>Type | Coordinates (Angstroms) |           |           |
|------------------|------------------|----------------|-------------------------|-----------|-----------|
|                  |                  |                | X                       | Y         | Z         |
| 1                | 5                | 0              | 2.665643                | 1.064153  | 0.241355  |
| 2                | 8                | 0              | 3.806978                | 1.719019  | -0.202809 |
| 3                | 8                | 0              | 2.483107                | 1.264954  | 1.595560  |
| 4                | 6                | 0              | 4.590413                | 2.061145  | 0.968419  |
| 5                | 6                | 0              | 3.498820                | 2.177395  | 2.075255  |
| 6                | 6                | 0              | 2.897958                | 3.572695  | 2.158348  |
| 7                | 1                | 0              | 2.003538                | 3.553459  | 2.787435  |
| 8                | 1                | 0              | 3.609717                | 4.281055  | 2.595232  |
| 9                | 1                | 0              | 2.596972                | 3.927524  | 1.171277  |
| 10               | 6                | 0              | 3.928590                | 1.702349  | 3.450749  |
| 11               | 1                | 0              | 4.786806                | 2.275512  | 3.818847  |
| 12               | 1                | 0              | 3.107434                | 1.836393  | 4.162338  |
| 13               | 1                | 0              | 4.189319                | 0.641297  | 3.437245  |
| 14               | 6                | 0              | 5.357921                | 3.333835  | 0.676640  |
| 15               | 1                | 0              | 5.914197                | 3.667110  | 1.559549  |
| 16               | 1                | 0              | 6.079798                | 3.156481  | -0.126008 |
| 17               | 1                | 0              | 4.694730                | 4.142017  | 0.360953  |
| 18               | 6                | 0              | 5.541601                | 0.898292  | 1.214352  |
| 19               | 1                | 0              | 6.175270                | 0.748319  | 0.334749  |
| 20               | 1                | 0              | 6.194844                | 1.078602  | 2.074098  |
| 21               | 1                | 0              | 4.970084                | -0.018147 | 1.390864  |
| 22               | 5                | 0              | 0.252627                | 1.669763  | -0.534969 |
| 23               | 8                | 0              | -0.861354               | 1.922987  | -1.328856 |
| 24               | 8                | 0              | 0.681202                | 2.834097  | 0.083139  |
| 25               | 6                | 0              | -0.064014               | 3.948354  | -0.470104 |
| 26               | 6                | 0              | -1.338452               | 3.259880  | -1.055854 |
| 27               | 6                | 0              | 0.813090                | 4.582864  | -1.541465 |
| 28               | 1                | 0              | 0.374558                | 5.507674  | -1.929417 |
| 29               | 1                | 0              | 1.792398                | 4.819358  | -1.113138 |
| 30               | 1                | 0              | 0.969735                | 3.903759  | -2.384333 |
| 31               | 6                | 0              | -0.332608               | 4.950593  | 0.635875  |
| 32               | 1                | 0              | 0.607163                | 5.385300  | 0.987954  |
| 33               | 1                | 0              | -0.964136               | 5.768315  | 0.271681  |
| 34               | 1                | 0              | -0.828957               | 4.486861  | 1.490788  |
| 35               | 6                | 0              | -2.482635               | 3.167782  | -0.056196 |

|    |    |   |           |           |           |
|----|----|---|-----------|-----------|-----------|
| 36 | 1  | 0 | -2.923067 | 4.151861  | 0.135815  |
| 37 | 1  | 0 | -3.272433 | 2.518893  | -0.449386 |
| 38 | 1  | 0 | -2.142381 | 2.743853  | 0.889510  |
| 39 | 6  | 0 | -1.847488 | 3.842457  | -2.361644 |
| 40 | 1  | 0 | -2.706316 | 3.259744  | -2.708209 |
| 41 | 1  | 0 | -2.173311 | 4.880042  | -2.230232 |
| 42 | 1  | 0 | -1.089162 | 3.814402  | -3.146901 |
| 43 | 5  | 0 | -1.008494 | -1.290120 | -0.970619 |
| 44 | 5  | 0 | -1.760177 | -0.833101 | -2.530563 |
| 45 | 5  | 0 | -1.060952 | -2.440480 | -2.343166 |
| 46 | 5  | 0 | -1.468289 | -3.008243 | -0.734907 |
| 47 | 6  | 0 | -2.407783 | -1.786721 | -0.104133 |
| 48 | 6  | 0 | -2.563201 | -0.563840 | -1.108028 |
| 49 | 5  | 0 | -2.577468 | -2.229184 | -3.237810 |
| 50 | 5  | 0 | -3.512522 | -0.974868 | -2.426134 |
| 51 | 1  | 0 | -1.361744 | 0.099804  | -3.123737 |
| 52 | 5  | 0 | -2.403901 | -3.580564 | -2.121189 |
| 53 | 1  | 0 | -0.071424 | -2.774030 | -2.899275 |
| 54 | 5  | 0 | -3.229747 | -3.151166 | -0.626746 |
| 55 | 1  | 0 | -0.806248 | -3.637842 | 0.010780  |
| 56 | 5  | 0 | -3.927258 | -1.543146 | -0.814835 |
| 57 | 1  | 0 | -2.599027 | 0.417338  | -0.644898 |
| 58 | 5  | 0 | -3.922296 | -2.670860 | -2.172586 |
| 59 | 1  | 0 | -2.623647 | -2.359976 | -4.415651 |
| 60 | 1  | 0 | -4.188009 | -0.126921 | -2.904732 |
| 61 | 1  | 0 | -2.328033 | -4.708020 | -2.477948 |
| 62 | 1  | 0 | -3.694374 | -3.863830 | 0.195213  |
| 63 | 1  | 0 | -4.947840 | -3.118693 | -2.560429 |
| 64 | 77 | 0 | 1.401447  | -0.089820 | -0.963788 |
| 65 | 6  | 0 | 3.409167  | -1.198050 | -1.763947 |
| 66 | 6  | 0 | 2.321771  | 1.315522  | -2.627371 |
| 67 | 6  | 0 | 1.185761  | 0.734509  | -3.181569 |
| 68 | 6  | 0 | 2.371429  | -1.769093 | -2.471371 |
| 69 | 6  | 0 | 4.382007  | -0.214138 | -2.341912 |
| 70 | 1  | 0 | 3.731228  | -1.684489 | -0.851136 |
| 71 | 6  | 0 | 3.730250  | 0.973582  | -3.061847 |
| 72 | 1  | 0 | 2.211935  | 2.282258  | -2.143626 |
| 73 | 6  | 0 | 1.189785  | -0.350556 | -4.219994 |
| 74 | 1  | 0 | 0.256545  | 1.290992  | -3.097783 |
| 75 | 6  | 0 | 2.166598  | -1.492081 | -3.937768 |
| 76 | 1  | 0 | 1.885008  | -2.637693 | -2.039703 |

|     |   |   |           |           |           |
|-----|---|---|-----------|-----------|-----------|
| 77  | 1 | 0 | 5.013331  | 0.160753  | -1.535149 |
| 78  | 1 | 0 | 5.047991  | -0.750636 | -3.035764 |
| 79  | 1 | 0 | 4.358022  | 1.856651  | -2.913015 |
| 80  | 1 | 0 | 3.706575  | 0.790110  | -4.144222 |
| 81  | 1 | 0 | 0.178676  | -0.759477 | -4.292835 |
| 82  | 1 | 0 | 1.397613  | 0.093321  | -5.206597 |
| 83  | 1 | 0 | 3.142786  | -1.283778 | -4.394148 |
| 84  | 1 | 0 | 1.798109  | -2.403704 | -4.419469 |
| 85  | 5 | 0 | 1.963962  | -1.550969 | 0.547486  |
| 86  | 5 | 0 | -0.096778 | -0.470631 | 0.501062  |
| 87  | 8 | 0 | 1.767891  | -2.863846 | 0.152900  |
| 88  | 8 | 0 | 2.927954  | -1.472958 | 1.548474  |
| 89  | 8 | 0 | -0.940582 | 0.582242  | 1.015526  |
| 90  | 6 | 0 | 3.453680  | -2.802099 | 1.804094  |
| 91  | 6 | 0 | 2.423165  | -3.746660 | 1.088180  |
| 92  | 8 | 0 | 0.036902  | -1.395368 | 1.599672  |
| 93  | 6 | 0 | -1.113420 | 0.517218  | 2.442280  |
| 94  | 6 | 0 | -0.434025 | -0.850958 | 2.846650  |
| 95  | 6 | 0 | 3.047293  | -4.876851 | 0.289271  |
| 96  | 1 | 0 | 3.605035  | -5.560289 | 0.938611  |
| 97  | 1 | 0 | 2.259354  | -5.450467 | -0.206202 |
| 98  | 1 | 0 | 3.723991  | -4.502096 | -0.482627 |
| 99  | 6 | 0 | 1.361417  | -4.304155 | 2.024616  |
| 100 | 1 | 0 | 0.596410  | -4.816722 | 1.436118  |
| 101 | 1 | 0 | 1.788492  | -5.019576 | 2.734847  |
| 102 | 1 | 0 | 0.869344  | -3.502022 | 2.576841  |
| 103 | 6 | 0 | 3.565330  | -3.006148 | 3.305806  |
| 104 | 1 | 0 | 4.010165  | -3.982526 | 3.526782  |
| 105 | 1 | 0 | 4.215551  | -2.236880 | 3.732964  |
| 106 | 1 | 0 | 2.603097  | -2.952356 | 3.813011  |
| 107 | 6 | 0 | 4.865594  | -2.876200 | 1.228364  |
| 108 | 1 | 0 | 5.494995  | -2.121682 | 1.708203  |
| 109 | 1 | 0 | 5.313913  | -3.855601 | 1.420852  |
| 110 | 1 | 0 | 4.902348  | -2.705114 | 0.150429  |
| 111 | 1 | 0 | -2.351004 | -1.530488 | 0.945956  |
| 112 | 6 | 0 | -1.387084 | -1.873944 | 3.459067  |
| 113 | 1 | 0 | -0.849719 | -2.809278 | 3.636677  |
| 114 | 1 | 0 | -1.773865 | -1.524144 | 4.421748  |
| 115 | 1 | 0 | -2.242839 | -2.111167 | 2.821878  |
| 116 | 6 | 0 | 0.754891  | -0.683383 | 3.782351  |
| 117 | 1 | 0 | 1.150671  | -1.668320 | 4.040333  |

|     |   |   |           |           |           |
|-----|---|---|-----------|-----------|-----------|
| 118 | 1 | 0 | 1.554942  | -0.112243 | 3.309881  |
| 119 | 1 | 0 | 0.454988  | -0.196324 | 4.715820  |
| 120 | 6 | 0 | -2.607090 | 0.578096  | 2.736386  |
| 121 | 1 | 0 | -3.178457 | -0.217092 | 2.252442  |
| 122 | 1 | 0 | -2.794698 | 0.522252  | 3.814312  |
| 123 | 1 | 0 | -3.020944 | 1.522225  | 2.370318  |
| 124 | 6 | 0 | -0.446716 | 1.743658  | 3.051970  |
| 125 | 1 | 0 | 0.604076  | 1.797052  | 2.767129  |
| 126 | 1 | 0 | -0.942848 | 2.646372  | 2.681798  |
| 127 | 1 | 0 | -0.533973 | 1.742959  | 4.143338  |
| 128 | 5 | 0 | -5.199260 | -0.796052 | -0.023649 |
| 129 | 8 | 0 | -5.064558 | 0.463372  | 0.523996  |
| 130 | 8 | 0 | -6.484117 | -1.268456 | 0.041489  |
| 131 | 6 | 0 | -6.324850 | 0.780914  | 1.178441  |
| 132 | 6 | 0 | -7.326371 | -0.145217 | 0.423703  |
| 133 | 6 | 0 | -6.175448 | 0.412217  | 2.647301  |
| 134 | 1 | 0 | -5.342433 | 0.969258  | 3.083079  |
| 135 | 1 | 0 | -7.079629 | 0.653374  | 3.214270  |
| 136 | 1 | 0 | -5.969788 | -0.656058 | 2.767357  |
| 137 | 6 | 0 | -6.576757 | 2.266620  | 1.024684  |
| 138 | 1 | 0 | -7.549831 | 2.544215  | 1.443710  |
| 139 | 1 | 0 | -5.806408 | 2.830379  | 1.559529  |
| 140 | 1 | 0 | -6.550040 | 2.573687  | -0.022686 |
| 141 | 6 | 0 | -8.475136 | -0.664286 | 1.262593  |
| 142 | 1 | 0 | -9.089138 | 0.163313  | 1.633975  |
| 143 | 1 | 0 | -9.114829 | -1.312114 | 0.658259  |
| 144 | 1 | 0 | -8.121864 | -1.243990 | 2.117212  |
| 145 | 6 | 0 | -7.839114 | 0.470302  | -0.870194 |
| 146 | 1 | 0 | -8.356056 | -0.295254 | -1.453168 |
| 147 | 1 | 0 | -8.539025 | 1.289385  | -0.678273 |
| 148 | 1 | 0 | -7.014570 | 0.855278  | -1.477992 |

---

**TS8u**

---

| Center<br>Number | Atomic<br>Number | Atomic<br>Type | Coordinates (Angstroms) |           |           |
|------------------|------------------|----------------|-------------------------|-----------|-----------|
|                  |                  |                | X                       | Y         | Z         |
| 1                | 5                | 0              | -2.359085               | 1.125961  | -0.739536 |
| 2                | 8                | 0              | -2.922365               | 1.752205  | -1.842316 |
| 3                | 8                | 0              | -3.108664               | 1.362691  | 0.394741  |
| 4                | 6                | 0              | -3.884256               | 2.717836  | -1.350026 |
| 5                | 6                | 0              | -4.294580               | 2.107821  | 0.024807  |
| 6                | 6                | 0              | -5.455548               | 1.132219  | -0.089584 |
| 7                | 1                | 0              | -5.558684               | 0.572647  | 0.844582  |
| 8                | 1                | 0              | -6.396251               | 1.659350  | -0.280739 |
| 9                | 1                | 0              | -5.278559               | 0.408030  | -0.886095 |
| 10               | 6                | 0              | -4.563447               | 3.127756  | 1.115945  |
| 11               | 1                | 0              | -5.367469               | 3.813097  | 0.825280  |
| 12               | 1                | 0              | -4.875281               | 2.620039  | 2.034252  |
| 13               | 1                | 0              | -3.666385               | 3.710011  | 1.342384  |
| 14               | 6                | 0              | -5.004041               | 2.840084  | -2.362981 |
| 15               | 1                | 0              | -5.789850               | 3.511183  | -1.999333 |
| 16               | 1                | 0              | -4.615819               | 3.255366  | -3.297682 |
| 17               | 1                | 0              | -5.453869               | 1.870416  | -2.586131 |
| 18               | 6                | 0              | -3.142016               | 4.039642  | -1.203760 |
| 19               | 1                | 0              | -2.727981               | 4.335604  | -2.172777 |
| 20               | 1                | 0              | -3.801151               | 4.842797  | -0.858783 |
| 21               | 1                | 0              | -2.316477               | 3.928570  | -0.494108 |
| 22               | 5                | 0              | -2.143757               | -1.454833 | -0.508863 |
| 23               | 8                | 0              | -1.832998               | -2.793717 | -0.634528 |
| 24               | 8                | 0              | -3.505166               | -1.243628 | -0.647998 |
| 25               | 6                | 0              | -4.120386               | -2.495551 | -1.048640 |
| 26               | 6                | 0              | -3.058690               | -3.558766 | -0.616045 |
| 27               | 6                | 0              | -4.319551               | -2.429794 | -2.556563 |
| 28               | 1                | 0              | -4.878176               | -3.293834 | -2.929845 |
| 29               | 1                | 0              | -4.879652               | -1.523238 | -2.807663 |
| 30               | 1                | 0              | -3.362382               | -2.391992 | -3.084986 |
| 31               | 6                | 0              | -5.461596               | -2.617869 | -0.351189 |
| 32               | 1                | 0              | -6.153501               | -1.856577 | -0.722824 |
| 33               | 1                | 0              | -5.909895               | -3.598993 | -0.542132 |
| 34               | 1                | 0              | -5.365260               | -2.485710 | 0.728675  |
| 35               | 6                | 0              | -3.268728               | -4.076814 | 0.797564  |

---

|    |    |   |           |           |           |
|----|----|---|-----------|-----------|-----------|
| 36 | 1  | 0 | -4.146301 | -4.728405 | 0.858614  |
| 37 | 1  | 0 | -2.388488 | -4.647485 | 1.104851  |
| 38 | 1  | 0 | -3.390020 | -3.251116 | 1.499179  |
| 39 | 6  | 0 | -2.891358 | -4.726306 | -1.570977 |
| 40 | 1  | 0 | -2.105142 | -5.389686 | -1.199858 |
| 41 | 1  | 0 | -3.816679 | -5.307863 | -1.646671 |
| 42 | 1  | 0 | -2.605584 | -4.399059 | -2.573098 |
| 43 | 5  | 0 | 0.831101  | -1.639907 | 0.613441  |
| 44 | 5  | 0 | 1.281794  | -3.108665 | -0.316429 |
| 45 | 5  | 0 | 3.045986  | -3.269463 | -0.373933 |
| 46 | 5  | 0 | 2.108011  | -4.279958 | 0.717242  |
| 47 | 1  | 0 | 0.684272  | -3.370996 | -1.296633 |
| 48 | 5  | 0 | 3.759461  | -1.945479 | 0.549960  |
| 49 | 1  | 0 | 2.373153  | -1.094837 | -1.116578 |
| 50 | 5  | 0 | 3.232952  | -2.134445 | 2.213378  |
| 51 | 1  | 0 | 2.472223  | -0.048748 | 1.195121  |
| 52 | 5  | 0 | 2.221185  | -3.576779 | 2.321395  |
| 53 | 1  | 0 | -0.286765 | -3.756892 | 1.624637  |
| 54 | 5  | 0 | 3.637537  | -3.557497 | 1.256187  |
| 55 | 1  | 0 | 3.552476  | -3.557697 | -1.404965 |
| 56 | 1  | 0 | 1.991235  | -5.442626 | 0.519456  |
| 57 | 1  | 0 | 3.870440  | -1.618606 | 3.066897  |
| 58 | 1  | 0 | 4.621327  | -4.183924 | 1.462412  |
| 59 | 77 | 0 | -0.557872 | -0.006178 | -0.801851 |
| 60 | 6  | 0 | 0.376065  | 1.781468  | -2.014116 |
| 61 | 6  | 0 | -1.268724 | -0.305112 | -2.959762 |
| 62 | 6  | 0 | -0.313252 | -1.304602 | -2.702603 |
| 63 | 6  | 0 | 1.378577  | 0.814953  | -1.916990 |
| 64 | 6  | 0 | -0.383845 | 2.078082  | -3.273785 |
| 65 | 1  | 0 | 0.410798  | 2.605951  | -1.310859 |
| 66 | 6  | 0 | -1.013707 | 0.842003  | -3.916611 |
| 67 | 1  | 0 | -2.315996 | -0.570521 | -2.844073 |
| 68 | 6  | 0 | 1.063529  | -1.305857 | -3.307340 |
| 69 | 1  | 0 | -0.683445 | -2.283640 | -2.413338 |
| 70 | 6  | 0 | 1.813189  | 0.016953  | -3.130904 |
| 71 | 1  | 0 | 2.101997  | 0.949388  | -1.115337 |
| 72 | 1  | 0 | -1.166946 | 2.800669  | -3.039301 |
| 73 | 1  | 0 | 0.299080  | 2.575111  | -3.981647 |
| 74 | 1  | 0 | -1.963713 | 1.126882  | -4.377270 |
| 75 | 1  | 0 | -0.377449 | 0.467911  | -4.730710 |
| 76 | 1  | 0 | 1.635665  | -2.126019 | -2.861500 |

|     |   |   |           |           |           |
|-----|---|---|-----------|-----------|-----------|
| 77  | 1 | 0 | 0.991883  | -1.563674 | -4.375976 |
| 78  | 1 | 0 | 1.690247  | 0.646698  | -4.021664 |
| 79  | 1 | 0 | 2.891557  | -0.175659 | -3.065464 |
| 80  | 5 | 0 | -0.046868 | 1.577551  | 0.611629  |
| 81  | 5 | 0 | -0.772995 | -0.505253 | 1.287677  |
| 82  | 8 | 0 | 1.319142  | 1.691199  | 0.840091  |
| 83  | 8 | 0 | -0.695796 | 2.759665  | 0.940251  |
| 84  | 8 | 0 | -1.801873 | -1.361701 | 1.699205  |
| 85  | 6 | 0 | 0.286740  | 3.747559  | 1.352251  |
| 86  | 6 | 0 | 1.590635  | 2.900318  | 1.579972  |
| 87  | 8 | 0 | -0.423608 | 0.311761  | 2.389849  |
| 88  | 6 | 0 | -2.202640 | -1.119119 | 3.063250  |
| 89  | 6 | 0 | -1.384391 | 0.164661  | 3.469446  |
| 90  | 6 | 0 | 2.859409  | 3.499390  | 0.999885  |
| 91  | 1 | 0 | 3.111435  | 4.450363  | 1.481610  |
| 92  | 1 | 0 | 3.688404  | 2.803532  | 1.159098  |
| 93  | 1 | 0 | 2.770433  | 3.666480  | -0.077683 |
| 94  | 6 | 0 | 1.822784  | 2.504024  | 3.030648  |
| 95  | 1 | 0 | 2.648742  | 1.787297  | 3.080271  |
| 96  | 1 | 0 | 2.084030  | 3.368463  | 3.649238  |
| 97  | 1 | 0 | 0.941044  | 2.016582  | 3.447875  |
| 98  | 6 | 0 | -0.226957 | 4.460236  | 2.591214  |
| 99  | 1 | 0 | 0.464627  | 5.255075  | 2.891081  |
| 100 | 1 | 0 | -1.195038 | 4.921054  | 2.373279  |
| 101 | 1 | 0 | -0.356899 | 3.788637  | 3.439401  |
| 102 | 6 | 0 | 0.410994  | 4.781232  | 0.236967  |
| 103 | 1 | 0 | -0.560575 | 5.253371  | 0.067752  |
| 104 | 1 | 0 | 1.123232  | 5.566469  | 0.508094  |
| 105 | 1 | 0 | 0.741121  | 4.350055  | -0.710827 |
| 106 | 1 | 0 | 1.037839  | -1.411588 | 3.182429  |
| 107 | 6 | 0 | -0.635396 | 0.027281  | 4.787163  |
| 108 | 1 | 0 | -0.055421 | 0.933635  | 4.982594  |
| 109 | 1 | 0 | -1.349031 | -0.086202 | 5.610416  |
| 110 | 1 | 0 | 0.047394  | -0.822071 | 4.808883  |
| 111 | 6 | 0 | -2.214594 | 1.438868  | 3.516725  |
| 112 | 1 | 0 | -1.567515 | 2.276232  | 3.787199  |
| 113 | 1 | 0 | -2.656924 | 1.658752  | 2.546327  |
| 114 | 1 | 0 | -2.999778 | 1.370852  | 4.276181  |
| 115 | 6 | 0 | -1.851008 | -2.363002 | 3.867825  |
| 116 | 1 | 0 | -0.783471 | -2.588972 | 3.823901  |
| 117 | 1 | 0 | -2.142560 | -2.253072 | 4.917218  |



|     |   |   |           |           |           |
|-----|---|---|-----------|-----------|-----------|
| 118 | 1 | 0 | -2.385078 | -3.223765 | 3.456887  |
| 119 | 6 | 0 | -3.708986 | -0.906398 | 3.066011  |
| 120 | 1 | 0 | -3.990097 | -0.113896 | 2.368506  |
| 121 | 1 | 0 | -4.215521 | -1.826965 | 2.760507  |
| 122 | 1 | 0 | -4.069075 | -0.651432 | 4.068256  |
| 123 | 6 | 0 | 2.387223  | -1.132393 | 1.159307  |
| 124 | 6 | 0 | 2.290324  | -1.777402 | -0.287712 |
| 125 | 5 | 0 | 1.479197  | -1.983104 | 2.257655  |
| 126 | 5 | 0 | 0.764263  | -3.295509 | 1.339340  |
| 127 | 1 | 0 | 2.176474  | -4.211455 | 3.322099  |
| 128 | 5 | 0 | 5.001858  | -0.943755 | 0.044195  |
| 129 | 8 | 0 | 4.815276  | 0.424525  | -0.041361 |
| 130 | 8 | 0 | 6.249047  | -1.336195 | -0.362825 |
| 131 | 6 | 0 | 5.954427  | 0.957595  | -0.775690 |
| 132 | 6 | 0 | 7.043467  | -0.129899 | -0.529310 |
| 133 | 6 | 0 | 7.802012  | 0.076896  | 0.773695  |
| 134 | 1 | 0 | 8.387764  | -0.818210 | 0.994931  |
| 135 | 1 | 0 | 8.485665  | 0.929170  | 0.712626  |
| 136 | 1 | 0 | 7.115130  | 0.244128  | 1.608592  |
| 137 | 6 | 0 | 8.004206  | -0.336078 | -1.681767 |
| 138 | 1 | 0 | 8.565472  | 0.581931  | -1.887292 |
| 139 | 1 | 0 | 8.723077  | -1.120630 | -1.433105 |
| 140 | 1 | 0 | 7.483590  | -0.635055 | -2.593426 |
| 141 | 6 | 0 | 5.523001  | 1.050276  | -2.231912 |
| 142 | 1 | 0 | 4.621275  | 1.666948  | -2.299341 |
| 143 | 1 | 0 | 6.297148  | 1.504853  | -2.857633 |
| 144 | 1 | 0 | 5.291722  | 0.060327  | -2.638279 |
| 145 | 6 | 0 | 6.299270  | 2.330292  | -0.235624 |
| 146 | 1 | 0 | 7.218676  | 2.705598  | -0.697934 |
| 147 | 1 | 0 | 5.498518  | 3.039465  | -0.462815 |
| 148 | 1 | 0 | 6.441079  | 2.314174  | 0.846989  |

---
